# Supplementary material for: A Comparative BAC Map for the Gilthead Sea Bream (Sparus aurata L.)
Source: Hindawi journal article supplement (doi:10.1155/2011/329025), 2010-10-13
Supplement: f1 [file 329025.f1.xls]

## Sheet: all mapped direct+indirect
RED=paired BAC ends not matching consistency criteria (distance or orientation), low evidence intra-chromosomal rearrangements!		Blue=potential intra-chromosomal rearrangements between stickleback and sea bream, which are covered by two or more sea bream BACs				GREEN= paired BAC ends matching consistency criteria, used for visualization in ensembl browser. Dark green was taken from direct mapping to G.a. genome.
Sparus aurata BAC ES	G.aculeatus chr	identity %	length	missmatches	gaps	BAC ES coord.		G.a. coordinates		e-value	score	REARR.No.		S. aurata BAC clone			distance between ends			BACtigs	Minimum tiling path clones
breambac-68m10.f	Ga_group_01	73.88	134	34	1	75	208	368758	368656	2e-17	93.5			breambac-68m10	2	same	101.538	-1	-
breambac-68m10.r	Ga_group_01	73.88	134	34	1	294	427	368758	368656	3e-17	93.5			breambac-68m10	2	same	101.538	-1	-
breambac-122i24.r	Ga_group_01	82.1	447	69	2	191	637	477954	478288	2e-116	423			breambac-122i24	2	same	2.68854e+07	1	-
breambac-101o11.f	Ga_group_01	66.3	276	93	0	334	609	563941	564152	1e-32	144	1		breambac-101o11	2	same	17452901	1	+
breambac-81b16.f	Ga_group_01	90.11	283	19	1	124	397	564425	564208	2e-91	339	1		breambac-81b16	2	same	1.73718e+07	-1	-
breambac-35g14.r	Ga_group_01	83.81	105	12	2	157	257	582254	582175	2e-12	77.7			breambac-35g14	2	same	7.39813e+06	-1	-
breambac-45m6.f	Ga_group_01	85.71	42	6	0	348	389	612658	612690	0.0007	49.1			breambac-45m6	2	same	2.21353e+07	1	-
breambac-30g22.r	Ga_group_01	86.25	80	10	1	297	375	675420	675481	2e-14	84	1		breambac-30g22	2	same	1.74158e+07	1	-
breambac-127p20.r	Ga_group_01	88.12	160	17	2	62	221	774532	774675	3e-42	175			breambac-127p20	2	same	16896.8	1	-
breambac-127p20.f	Ga_group_01	82.2	354	53	3	236	589	791165	791428	2e-86	323			breambac-127p20	2	same	16896.8	1	-
breambac-111e9.r	Ga_group_01	90	50	5	0	502	551	800163	800125	1e-08	65			breambac-111e9	2	same	1.17252e+07	-1	-
breambac-42f19.r	Ga_group_01	83.07	437	58	2	238	658	814533	814897	4e-115	418			breambac-42f19	2	same	1.86663e+07	1	-
breambac-67k21.r	Ga_group_01	68.68	182	45	3	232	401	850558	850697	2e-09	66.6			breambac-67k21	2	same	44550.9	1	+	Contig Start	breambac-67k21.r
breambac-41a6.f	Ga_group_01	83.33	54	9	0	680	733	852870	852829	9e-07	58.6			breambac-41a6	2	same	393257	-1	-
breambac-67k21.f	Ga_group_01	47.11	225	119	0	372	596	895109	894937	4e-31	139			breambac-67k21	2	same	44550.9	-1	+	Contig End	breambac-67k21.f
breambac-125l6.r	Ga_group_01	85.57	194	20	2	1	187	912273	912421	6e-47	191			breambac-125l6	2	same	63215.5	1	+	Contig Start	breambac-125l6.r
breambac-114g13.f	Ga_group_01	76.37	182	32	4	138	316	919137	919270	1e-20	104			breambac-114g13	2	same	63285.2	1	+	MAX	breambac-114g13.f
breambac-125l6.f	Ga_group_01	72.8	364	82	6	272	634	975489	975222	2e-46	190			breambac-125l6	2	same	63215.5	-1	+		breambac-125l6.f
breambac-114g13.r	Ga_group_01	91.63	215	17	1	225	438	982422	982258	4e-72	275			breambac-114g13	2	same	63285.2	-1	+	Contig End	breambac-114g13.r
breambac-139c18.f	Ga_group_01	71.8	305	64	5	224	519	1.07627e+06	1.0765e+06	8e-31	137			breambac-139c18	2	same	22868	1	+	Contig Start	breambac-139c18.f
breambac-131j18.f	Ga_group_01	73.02	215	48	4	61	265	1.07828e+06	1.07844e+06	1e-22	110			breambac-131j18	2	same	21463.8	1	+
breambac-94m20.r	Ga_group_01	93.47	337	19	2	366	702	1.09789e+06	1.09821e+06	3e-123	445			breambac-94m20	2	same	41718.8	1	+	MAX	breambac-94m20.r
breambac-139c18.r	Ga_group_01	74.42	86	22	0	121	206	1.09914e+06	1.09908e+06	1e-09	68.2			breambac-139c18	2	same	22868	-1	+		breambac-139c18.r
breambac-131j18.r	Ga_group_01	80.24	167	28	1	383	549	1.09974e+06	1.09962e+06	4e-33	145			breambac-131j18	2	same	21463.8	-1	+
breambac-94m20.f	Ga_group_01	72.02	193	46	1	411	595	1.13961e+06	1.13947e+06	5e-24	115			breambac-94m20	2	same	41718.8	-1	+	Contig End	breambac-94m20.f
breambac-14k19.f	Ga_group_01	77.44	164	35	1	355	518	1207949	1.20783e+06	2e-29	133			breambac-14k19	2	same	6809.23	-1	-
breambac-14k19.r	Ga_group_01	81.18	85	16	0	27	111	1.21463e+06	1.21457e+06	3e-15	85.6			breambac-14k19	2	same	6809.23	-1	-
breambac-79p16.f	Ga_group_01	75	140	31	3	222	359	1.22585e+06	1.22575e+06	6e-14	82.4			breambac-79p16	2	same	4.46042e+06	-1	-
breambac-41a6.r	Ga_group_01	87.23	47	6	0	525	571	1.24609e+06	1.24605e+06	2e-06	57.1			breambac-41a6	2	same	393257	-1	-
breambac-126n8.f	Ga_group_01	80.71	197	33	2	307	503	1.27346e+06	1.27361e+06	3e-40	169			breambac-126n8	2	same	3.59026e+06	1	-
breambac-7f24.r	Ga_group_01	77.43	226	48	2	203	427	1.36799e+06	1.36816e+06	2e-42	177			breambac-7f24	2	same	42340.7	1	-
breambac-7f24.f	Ga_group_01	85.71	42	6	0	314	355	1.4103e+06	1.41033e+06	0.0006	49.1			breambac-7f24	2	same	42340.7	1	-
breambac-34m2.r	Ga_group_01	69.87	312	77	7	62	362	1.41374e+06	1.41397e+06	3e-24	115			breambac-34m2	2	same	39992.1	1	+	Contig Start	breambac-34m2.r
breambac-34m2.f	Ga_group_01	74.07	216	50	3	250	461	1.45373e+06	1.45357e+06	2e-29	133			breambac-34m2	2	same	39992.1	-1	+	Contig End	breambac-34m2.f
breambac-141p5.r	Ga_group_01	76.09	138	32	1	39	175	1.46783e+06	1.46794e+06	4e-21	106			breambac-141p5	2	same	26795.3	1	+	Contig Start	breambac-141p5.r
breambac-141p5.f	Ga_group_01	83.12	231	32	1	3	233	1494628	1.49446e+06	6e-57	225			breambac-141p5	2	same	26795.3	-1	+	Contig End	breambac-141p5.f
breambac-11m24.f	Ga_group_01	87.94	141	16	1	365	505	1.49526e+06	1.49536e+06	7e-38	161			breambac-11m24	2	same	39858.5	1	+	Contig Start	breambac-11m24.f
breambac-11m24.r	Ga_group_01	84.76	328	41	3	1	327	1535115	1.53482e+06	6e-87	324			breambac-11m24	2	same	39858.5	-1	+	Contig End	breambac-11m24.r
breambac-30d12.r	Ga_group_01	87.56	201	21	1	508	704	1.55211e+06	1.55226e+06	3e-57	226			breambac-30d12	2	same	54176.3	1	+	Contig Start	breambac-30d12.r
breambac-80b9.r	Ga_group_01	81.35	327	40	7	146	462	1.55911e+06	1559354	1e-60	237			breambac-80b9	2	same	43043.5	1	+
breambac-68f1.r	Ga_group_01	78.92	166	34	1	346	511	1.56287e+06	1.56299e+06	1e-32	144			breambac-68f1	2	same	39006.9	1	+
breambac-130k4.f	Ga_group_01	77.27	198	33	4	2	198	1.57437e+06	1.57451e+06	6e-26	122			breambac-130k4	2	same	27734.3	1	+
breambac-68f1.f	Ga_group_01	84.46	193	30	0	206	398	1601874	1.60173e+06	4e-53	212			breambac-68f1	2	same	39006.9	-1	+
breambac-130k4.r	Ga_group_01	84.62	221	34	0	289	509	1.6021e+06	1.60193e+06	1e-62	244			breambac-130k4	2	same	27734.3	-1	+
breambac-80b9.f	Ga_group_01	74.74	293	73	1	279	570	1.60216e+06	1.60193e+06	1e-63	247			breambac-80b9	2	same	43043.5	-1	+
breambac-30d12.f	Ga_group_01	76.92	182	35	2	231	412	1.60628e+06	1606148	3e-28	129			breambac-30d12	2	same	54176.3	-1	+	Contig End	breambac-30d12.f
breambac-24c6.r	Ga_group_01	82.89	187	31	1	426	612	1.6121e+06	1.61224e+06	2e-45	187			breambac-24c6	2	same	56346.8	1	+	Contig Start	breambac-24c6.r
breambac-16i15.f	Ga_group_01	80.27	294	50	4	310	603	1.6396e+06	1639816	5e-56	221			breambac-16i15	2	same	59950.6	1	+
breambac-94c20.f	Ga_group_01	83.47	121	17	3	392	510	1655988	1656107	7e-20	101			breambac-94c20	2	same	72814	1	+	MAX	breambac-94c20.f
breambac-24c6.f	Ga_group_01	81.95	133	24	0	1	133	1.66845e+06	1.66835e+06	3e-30	136			breambac-24c6	2	same	56346.8	-1	+		breambac-24c6.f
breambac-24e14.f	Ga_group_01	81.89	508	64	5	8	515	1.66847e+06	1.66884e+06	4e-116	421			breambac-24e14	2	same	60675.1	1	+
breambac-31l23.f	Ga_group_01	71.5	214	51	4	326	535	1.67476e+06	1674604	2e-19	99.9			breambac-31l23	2	same	9632290	-1	-
breambac-60h11.f	Ga_group_01	85.19	351	45	3	59	405	1.67579e+06	1.67621e+06	5e-97	358			breambac-60h11	2	same	86417.8	1	+	MAX	breambac-60h11.f
breambac-16i15.r	Ga_group_01	83.5	503	66	4	1	503	1.69955e+06	1.69917e+06	3e-133	478			breambac-16i15	2	same	59950.6	-1	+
breambac-53g2.f	Ga_group_01	81.08	74	13	1	415	487	1.70981e+06	1.70986e+06	3e-08	63.4			breambac-53g2	2	same	50364.6	1	+
breambac-95d10.f	Ga_group_01	81.08	74	13	1	424	496	1.70981e+06	1.70986e+06	3e-08	63.4			breambac-95d10	2	same	52366.9	1	+
breambac-94c20.r	Ga_group_01	77.03	148	27	2	378	524	1728802	1728661	9e-20	101			breambac-94c20	2	same	72814	-1	+		breambac-94c20.r
breambac-24e14.r	Ga_group_01	83.53	346	57	0	344	689	1.72915e+06	1.72888e+06	2e-96	356			breambac-24e14	2	same	60675.1	-1	+
breambac-65m13.r	Ga_group_01	77.92	77	17	0	216	292	1.73733e+06	1.73739e+06	3e-10	69.7			breambac-65m13	2	same	1.96636e+07	1	+
breambac-53g2.r	Ga_group_01	90.8	348	28	3	1	347	1.76017e+06	1.75986e+06	4e-116	421			breambac-53g2	2	same	50364.6	-1	+
breambac-95d10.r	Ga_group_01	72.6	365	74	7	62	411	1.76218e+06	1761904	6e-35	152			breambac-95d10	2	same	52366.9	-1	+
breambac-60h11.r	Ga_group_01	70.44	406	96	9	15	408	1.76221e+06	1761904	5e-33	145			breambac-60h11	2	same	86417.8	-1	+	Contig End	breambac-60h11.r
breambac-21k8.f	Ga_group_01	84.89	139	20	1	506	644	1.76259e+06	1.76271e+06	4e-33	145			breambac-21k8	2	same	63888.9	1	+	Contig Start	breambac-21k8.f
breambac-21k8.r	Ga_group_01	75.62	324	68	3	323	639	1.82648e+06	1.82623e+06	6e-57	225			breambac-21k8	2	same	63888.9	-1	+	Contig End	breambac-21k8.r
breambac-54j3.r	Ga_group_01	88.6	272	28	1	236	507	1.90683e+06	1.90708e+06	1e-84	316			breambac-54j3	2	same	54844.2	1	+	Contig Start	breambac-54j3.r
breambac-71n2.r	Ga_group_01	79.2	399	77	3	1	394	1.90771e+06	1.90806e+06	3e-102	375			breambac-71n2	2	same	69053.8	1	+
breambac-50m19.r	Ga_group_01	82.93	334	53	3	240	573	1.9189e+06	1.91915e+06	1e-85	320			breambac-50m19	2	same	253.077	1	+
breambac-50m19.f	Ga_group_01	81.79	313	53	3	350	662	1.91915e+06	1.91892e+06	2e-75	286			breambac-50m19	2	same	253.077	-1	+
breambac-116h14.f	Ga_group_01	69.7	132	40	0	403	534	1.93102e+06	1.93112e+06	2e-14	84	2		breambac-116h14	2	same	1.77049e+06	1	+
breambac-104i4.f	Ga_group_01	69.7	132	40	0	403	534	1.93102e+06	1.93112e+06	2e-14	84	2		breambac-104i4	2	same	1.79375e+06	1	+
breambac-59e11.r	Ga_group_01	69.7	132	40	0	379	510	1.93102e+06	1.93112e+06	2e-14	84	2		breambac-59e11	2	same	1.80062e+06	1	+
breambac-95a18.r	Ga_group_01	73.91	92	24	0	228	319	1.93369e+06	1.93362e+06	1e-10	71.3			breambac-95a18	2	same	6.57783e+06	-1	-
breambac-49m11.r	Ga_group_01	68.01	272	85	2	417	686	1.93472e+06	1.93452e+06	1e-30	137			breambac-49m11	2	same	6.04579e+06	-1	-
breambac-76j9.f	Ga_group_01	78.32	286	56	4	175	459	1.9397e+06	1.93991e+06	1e-54	217			breambac-76j9	2	same	61515.8	1	+
breambac-56k24.r	Ga_group_01	78.67	286	55	4	132	416	1.9397e+06	1.93991e+06	1e-55	220			breambac-56k24	2	same	98501.2	1	+	MAX	breambac-56k24.r
breambac-54j3.f	Ga_group_01	82.97	323	42	5	53	372	1.96167e+06	1.9614e+06	3e-72	275			breambac-54j3	2	same	54844.2	-1	+		breambac-54j3.f
breambac-49g15.r	Ga_group_01	85.97	335	46	1	124	458	1.96182e+06	1.96208e+06	9e-82	307			breambac-49g15	2	same	79839.5	1	+
breambac-55j20.r	Ga_group_01	88.17	169	20	0	556	724	1.96603e+06	1.96615e+06	1e-51	207			breambac-55j20	2	same	71813.3	1	+
breambac-71n2.f	Ga_group_01	84.07	408	55	2	298	699	1.97676e+06	1.97639e+06	1e-112	410			breambac-71n2	2	same	69053.8	-1	+
breambac-91n10.f	Ga_group_01	83.66	410	55	4	297	698	1.97676e+06	1976392	1e-104	383			breambac-91n10	2	same	1.75193e+07	-1	-
breambac-76j9.r	Ga_group_01	75.1	245	55	2	166	404	2.00121e+06	2.00102e+06	1e-40	171			breambac-76j9	2	same	61515.8	-1	+
breambac-7b20.r	Ga_group_01	84.47	103	14	1	571	673	2.00365e+06	2.00372e+06	4e-20	103			breambac-7b20	2	same	58814.4	1	-
breambac-27i3.r	Ga_group_01	88.96	163	18	0	570	732	2025174	2.02533e+06	1e-48	198			breambac-27i3	2	same	73875.3	1	+
breambac-138k1.r	Ga_group_01	75.74	136	33	0	6	141	2037763	2037898	3e-23	112			breambac-138k1	2	same	88687	1	+	MAX	breambac-138k1.r
breambac-55j20.f	Ga_group_01	77.31	260	48	4	36	292	2.03784e+06	2.03765e+06	1e-42	177			breambac-55j20	2	same	71813.3	-1	+
breambac-56k24.f	Ga_group_01	82.72	301	45	2	14	313	2.0382e+06	2.03797e+06	2e-75	286			breambac-56k24	2	same	98501.2	-1	+		breambac-56k24.f
breambac-49g15.f	Ga_group_01	87.15	249	20	1	313	549	2.04166e+06	2.04144e+06	1e-69	267			breambac-49g15	2	same	79839.5	-1	+
breambac-7b20.f	Ga_group_01	83.44	157	22	1	457	613	2.06217e+06	2.06246e+06	2e-35	153			breambac-7b20	2	same	58814.4	1	-
breambac-135k12.f	Ga_group_01	84.76	328	43	3	1	327	2.07521e+06	2.07555e+06	5e-88	328			breambac-135k12	2	same	81392.7	1	+	MAX	breambac-135k12.f
breambac-70j17.f	Ga_group_01	94.44	126	7	0	1	126	2.07577e+06	2.0759e+06	4e-43	179			breambac-70j17	2	same	58587.2	1	+
breambac-71m7.r	Ga_group_01	79.52	210	34	3	246	455	2076095	2.07625e+06	2e-37	160			breambac-71m7	2	same	153.846	1	+
breambac-71m7.f	Ga_group_01	79.52	210	34	3	278	487	2.07625e+06	2076095	3e-37	160			breambac-71m7	2	same	153.846	-1	+
breambac-35b22.f	Ga_group_01	81.34	343	51	2	158	487	2.08363e+06	2.08394e+06	3e-81	305			breambac-35b22	2	same	67876.7	1	+
breambac-53i9.f	Ga_group_01	73.65	167	39	3	360	525	2.09169e+06	2.09182e+06	8e-17	91.9			breambac-53i9	2	same	18740.3	1	+
breambac-27i3.f	Ga_group_01	78.34	314	52	4	103	401	2.09905e+06	2.09881e+06	1e-57	226			breambac-27i3	2	same	73875.3	-1	+
breambac-53i9.r	Ga_group_01	81.08	333	54	2	13	345	2.11043e+06	2.11017e+06	1e-76	290			breambac-53i9	2	same	18740.3	-1	+
breambac-138k1.f	Ga_group_01	81.63	98	18	0	579	676	2126450	2126353	3e-19	99.9			breambac-138k1	2	same	88687	-1	+		breambac-138k1.f
breambac-70j17.r	Ga_group_01	75.89	141	33	1	34	173	2.13435e+06	2.13424e+06	1e-21	107			breambac-70j17	2	same	58587.2	-1	+
breambac-35b22.r	Ga_group_01	88.46	234	27	0	1	234	2.1515e+06	2.15132e+06	2e-75	286			breambac-35b22	2	same	67876.7	-1	+
breambac-135k12.r	Ga_group_01	84.71	157	24	0	398	554	2.1566e+06	2.15645e+06	1e-41	174			breambac-135k12	2	same	81392.7	-1	+	Contig End	breambac-135k12.r
breambac-79k13.r	Ga_group_01	74.28	416	89	3	16	416	2.15774e+06	2.15806e+06	3e-70	269			breambac-79k13	2	same	43739	1	-
breambac-6m17.f	Ga_group_01	74.25	334	68	3	1	322	2.16022e+06	2.16057e+06	3e-51	206			breambac-6m17	2	same	45110.2	1	+	Contig Start	breambac-6m17.f
breambac-79k13.f	Ga_group_01	77.75	346	71	2	283	628	2.20106e+06	2.20148e+06	1e-73	280			breambac-79k13	2	same	43739	1	-
breambac-6m17.r	Ga_group_01	70.77	349	79	6	182	510	2.20533e+06	2.20506e+06	2e-33	147			breambac-6m17	2	same	45110.2	-1	+	Contig End	breambac-6m17.r
breambac-72d18.r	Ga_group_01	76.74	387	74	6	250	633	2.22978e+06	2.23007e+06	5e-63	245			breambac-72d18	2	same	75363.1	1	+	Contig Start	breambac-72d18.r
breambac-123a22.f	Ga_group_01	79.33	208	34	4	121	328	2.24331e+06	2.24348e+06	2e-34	148			breambac-123a22	2	same	61467.2	1	+
breambac-67m23.f	Ga_group_01	79.17	48	10	0	222	269	2.24483e+06	2.24487e+06	0.005	46			breambac-67m23	2	same	81404.2	1	+
breambac-27g23.r	Ga_group_01	91.6	524	39	3	14	535	2.26149e+06	2.26219e+06	3e-161	572			breambac-27g23	2	same	59285.3	1	+
breambac-83l7.f	Ga_group_01	65.59	340	117	0	3	342	2.26339e+06	2.26369e+06	3e-67	258			breambac-83l7	2	same	44255.3	1	+
breambac-68e13.r	Ga_group_01	80.67	357	50	4	127	477	2263516	2.26382e+06	2e-75	286			breambac-68e13	2	same	57258.1	1	+
breambac-40o14.r	Ga_group_01	88.33	60	6	1	259	317	2292061	2292120	8e-09	65			breambac-40o14	2	same	65695	1	+
breambac-142h10.r	Ga_group_01	79.75	79	16	0	196	274	2296001	2296079	4e-12	76.1			breambac-142h10	2	same	61755	1	+
breambac-27b16.r	Ga_group_01	80.29	137	24	1	113	246	2.29729e+06	2297393	3e-25	120			breambac-27b16	2	same	66495.8	1	+
breambac-79o22.f	Ga_group_01	75.73	103	22	1	233	335	2.29859e+06	2.29867e+06	3e-11	72.9			breambac-79o22	2	same	65190.5	1	+
breambac-127h16.f	Ga_group_01	69.23	208	54	3	362	559	2.29868e+06	2.29872e+06	7e-16	88.8			breambac-127h16	2	same	67432.8	1	+	MAX	breambac-127h16.f
breambac-62p12.f	Ga_group_01	78.13	599	94	6	1	589	2.30462e+06	2.30506e+06	2e-118	429			breambac-62p12	2	same	16155.2	1	+
breambac-123a22.r	Ga_group_01	90.46	461	42	2	1	461	2.30477e+06	2.30442e+06	7e-162	573			breambac-123a22	2	same	61467.2	-1	+
breambac-72d18.f	Ga_group_01	81.67	120	15	3	580	696	2.30514e+06	2.30505e+06	2e-15	87.2			breambac-72d18	2	same	75363.1	-1	+		breambac-72d18.f
breambac-42m18.r	Ga_group_01	73.48	230	47	5	60	279	2.30556e+06	2305735	1e-22	110			breambac-42m18	2	same	60550.7	1	+
breambac-83l7.r	Ga_group_01	81.14	228	39	2	424	651	2.30765e+06	2.30748e+06	1e-50	204			breambac-83l7	2	same	44255.3	-1	+
breambac-31i4.r	Ga_group_01	83.27	281	46	1	315	594	2.30813e+06	2.30835e+06	5e-76	288			breambac-31i4	2	same	58184.4	1	+
breambac-62p12.r	Ga_group_01	80.59	407	61	3	217	606	2.32077e+06	2.32046e+06	9e-93	343			breambac-62p12	2	same	16155.2	-1	+
breambac-68e13.f	Ga_group_01	80.05	411	64	3	251	644	2.32077e+06	2.32046e+06	3e-92	342			breambac-68e13	2	same	57258.1	-1	+
breambac-27g23.f	Ga_group_01	80.2	404	62	3	250	636	2.32077e+06	2.32046e+06	2e-90	336			breambac-27g23	2	same	59285.3	-1	+
breambac-25h15.r	Ga_group_01	90.07	272	23	4	1	270	2323320	2323589	2e-78	296			breambac-25h15	2	same	50302	1	+
breambac-67m23.r	Ga_group_01	77.91	86	18	1	266	351	2.32623e+06	2.32617e+06	8e-10	68.2			breambac-67m23	2	same	81404.2	-1	+
breambac-72f11.r	Ga_group_01	77.53	89	16	2	231	319	2326697	2326781	2e-06	57.1			breambac-72f11	2	same	46925	1	+
breambac-37p21.f	Ga_group_01	80.86	209	29	2	558	757	2.34014e+06	2.3403e+06	1e-41	174			breambac-37p21	2	same	63614	1	+
breambac-70o12.f	Ga_group_01	73.59	587	96	12	1	569	2.34725e+06	2.34767e+06	5e-66	255			breambac-70o12	2	same	52815.5	1	+
breambac-30h17.r	Ga_group_01	73.23	254	58	6	498	748	2.34768e+06	2.34787e+06	1e-26	125			breambac-30h17	2	same	71999.2	1	+	MAX	breambac-30h17.r
breambac-142h10.f	Ga_group_01	72.12	330	79	3	348	671	2357756	2357434	7e-49	198			breambac-142h10	2	same	61755	-1	+
breambac-40o14.f	Ga_group_01	71.23	438	106	5	328	752	2357756	2357326	8e-60	234			breambac-40o14	2	same	65695	-1	+
breambac-53c12.f	Ga_group_01	72.47	523	128	4	1	523	2.35968e+06	2.36007e+06	4e-84	315			breambac-53c12	2	same	57068.2	1	+
breambac-79o22.r	Ga_group_01	78.48	446	91	3	29	473	2.36378e+06	2363408	3e-101	372			breambac-79o22	2	same	65190.5	-1	+
breambac-27b16.f	Ga_group_01	78.25	446	92	3	66	510	2.36378e+06	2363408	2e-100	369			breambac-27b16	2	same	66495.8	-1	+
breambac-42m18.f	Ga_group_01	78.21	179	32	2	488	660	2.36611e+06	2.36598e+06	1e-29	134			breambac-42m18	2	same	60550.7	-1	+
breambac-127h16.r	Ga_group_01	78.21	179	32	2	406	578	2.36611e+06	2.36598e+06	1e-29	134			breambac-127h16	2	same	67432.8	-1	+		breambac-127h16.r
breambac-31i4.f	Ga_group_01	73.45	113	30	0	224	336	2.36632e+06	2.36623e+06	5e-15	85.6			breambac-31i4	2	same	58184.4	-1	+
breambac-73b20.r	Ga_group_01	83.61	415	58	6	14	425	2.36715e+06	2367459	3e-102	375			breambac-73b20	2	same	52536.9	1	+
breambac-72f11.f	Ga_group_01	83.33	48	8	0	359	406	2373622	2373575	6e-05	52.3			breambac-72f11	2	same	46925	-1	+
breambac-25h15.f	Ga_group_01	83.33	48	8	0	327	374	2373622	2373575	5e-05	52.3			breambac-25h15	2	same	50302	-1	+
breambac-140l11.f	Ga_group_01	76.89	662	117	10	1	655	2.39204e+06	2.39252e+06	4e-115	418			breambac-140l11	2	same	65545.2	1	+
breambac-38h17.r	Ga_group_01	79.28	608	89	12	67	666	2.39213e+06	2.39257e+06	7e-110	400			breambac-38h17	2	same	76043.5	1	+
breambac-70o12.r	Ga_group_01	76.74	301	54	5	91	384	2.40007e+06	2.39984e+06	5e-45	185			breambac-70o12	2	same	52815.5	-1	+
breambac-37p21.r	Ga_group_01	84.7	281	37	4	3	282	2.40375e+06	2.40349e+06	3e-70	269			breambac-37p21	2	same	63614	-1	+
breambac-78b16.f	Ga_group_01	81.31	519	74	5	122	634	2.40388e+06	2404264	1e-113	413			breambac-78b16	2	same	77267.5	1	-
breambac-39m4.f	Ga_group_01	85.95	605	59	6	29	614	2.40812e+06	2.4086e+06	2e-170	602			breambac-39m4	2	same	65955.9	1	+	MAX	breambac-39m4.f
breambac-53c12.r	Ga_group_01	73.71	658	154	7	11	652	2.41674e+06	2.41624e+06	5e-97	358			breambac-53c12	2	same	57068.2	-1	+
breambac-91i5.f	Ga_group_01	80.86	162	30	1	2	163	2.4168e+06	2.41692e+06	2e-34	150			breambac-91i5	2	same	50535.9	1	+
breambac-73b20.f	Ga_group_01	87.29	236	24	4	322	557	2.41968e+06	2.41951e+06	4e-61	239			breambac-73b20	2	same	52536.9	-1	+
breambac-30h17.f	Ga_group_01	87.29	236	24	4	317	552	2.41968e+06	2.41951e+06	4e-61	239			breambac-30h17	2	same	71999.2	-1	+		breambac-30h17.f
breambac-72i20.r	Ga_group_01	77.24	413	72	5	265	672	2.42483e+06	2.42513e+06	2e-74	283			breambac-72i20	2	same	71468	1	+
breambac-140l11.r	Ga_group_01	79.81	634	107	7	111	732	2.45758e+06	2.4571e+06	3e-143	511			breambac-140l11	2	same	65545.2	-1	+
breambac-91i5.r	Ga_group_01	72.88	118	29	1	608	722	2.46734e+06	2.46725e+06	6e-13	79.2			breambac-91i5	2	same	50535.9	-1	+
breambac-38h17.f	Ga_group_01	80.71	700	112	11	29	725	2.46817e+06	2.46765e+06	9e-153	543			breambac-38h17	2	same	76043.5	-1	+
breambac-4a10.r	Ga_group_01	73.71	407	95	3	172	573	2.46837e+06	2.46868e+06	8e-69	264			breambac-4a10	2	same	78010.5	1	+	MAX	breambac-4a10.r
breambac-102h22.f	Ga_group_01	73.96	407	94	3	205	606	2.46837e+06	2.46868e+06	9e-70	267			breambac-102h22	2	same	58262.8	1	-
breambac-39m4.r	Ga_group_01	63.69	325	108	3	419	743	2.47407e+06	2.47383e+06	7e-25	118			breambac-39m4	2	same	65955.9	-1	+		breambac-39m4.r
breambac-78b16.r	Ga_group_01	79.07	215	35	5	442	648	2.47924e+06	2.48115e+06	1e-32	144			breambac-78b16	2	same	77267.5	1	-
breambac-72i20.f	Ga_group_01	81.5	600	100	5	1	597	2.4963e+06	2.49579e+06	3e-154	548			breambac-72i20	2	same	71468	-1	+
breambac-27n7.f	Ga_group_01	83.33	42	7	0	46	87	2499116	2499157	0.004	46			breambac-27n7	2	same	57605	1	+
breambac-16i22.f	Ga_group_01	73.47	147	37	2	64	209	2.49926e+06	2.49937e+06	7e-17	91.9			breambac-16i22	2	same	10983.7	1	+
breambac-16i22.r	Ga_group_01	85.71	112	15	1	110	220	2.51025e+06	2.51016e+06	5e-25	118			breambac-16i22	2	same	10983.7	-1	+
breambac-102h22.r	Ga_group_01	76.31	498	105	6	32	527	2.52626e+06	2.52663e+06	8e-93	343			breambac-102h22	2	same	58262.8	1	-
breambac-28c2.f	Ga_group_01	71.91	89	25	0	2	90	2.53578e+06	2.53571e+06	3e-08	63.4			breambac-28c2	2	same	13318.9	-1	-
breambac-76n22.f	Ga_group_01	70.79	89	26	0	2	90	2.53578e+06	2.53571e+06	3e-07	60.2			breambac-76n22	2	same	13318.9	-1	-
breambac-82k18.f	Ga_group_01	73.81	126	30	2	10	132	2.54475e+06	2.54485e+06	5e-12	76.1			breambac-82k18	2	same	27890.7	1	+	MAX	breambac-82k18.f
breambac-4a10.f	Ga_group_01	86.46	192	21	2	278	469	2.54638e+06	2.54624e+06	2e-49	199			breambac-4a10	2	same	78010.5	-1	+		breambac-4a10.f
breambac-28c2.r	Ga_group_01	73.93	257	54	3	224	467	2.54903e+06	2.54884e+06	5e-35	152			breambac-28c2	2	same	13318.9	-1	-
breambac-76n22.r	Ga_group_01	73.93	257	54	3	223	466	2.54903e+06	2.54884e+06	7e-35	152			breambac-76n22	2	same	13318.9	-1	-
breambac-27n7.r	Ga_group_01	82.19	73	13	0	629	701	2556721	2556649	5e-12	76.1			breambac-27n7	2	same	57605	-1	+
breambac-140j8.r	Ga_group_01	80.24	167	22	3	476	641	2.57153e+06	2.57165e+06	2e-25	120			breambac-140j8	2	same	46108.4	1	+	MAX	breambac-140j8.r
breambac-82k18.r	Ga_group_01	69.34	287	77	2	147	430	2.57264e+06	2.57243e+06	9e-39	164			breambac-82k18	2	same	27890.7	-1	+		breambac-82k18.r
breambac-144m5.r	Ga_group_01	75.45	224	53	2	149	371	2.57303e+06	2.5732e+06	1e-38	163			breambac-144m5	2	same	44583	1	+	MAX	breambac-144m5.r
breambac-86b22.f	Ga_group_01	75	100	21	2	265	362	2.58434e+06	2.58427e+06	4e-07	58.6			breambac-86b22	2	same	36857.4	-1	-
breambac-144m5.f	Ga_group_01	78	200	42	1	47	244	2.61761e+06	2.61746e+06	1e-39	168			breambac-144m5	2	same	44583	-1	+	Contig End	breambac-144m5.f
breambac-140j8.f	Ga_group_01	76.17	235	51	2	12	244	2.61764e+06	2.61746e+06	3e-41	172			breambac-140j8	2	same	46108.4	-1	+		breambac-140j8.f
breambac-86b22.r	Ga_group_01	78.33	60	13	0	68	127	2.62108e+06	2.62112e+06	3e-06	55.5			breambac-86b22	2	same	36857.4	1	-
breambac-11f20.f	Ga_group_01	53.37	416	172	6	213	618	2.62843e+06	2.62874e+06	8e-26	122			breambac-11f20	2	same	83856.5	1	+	Contig Start	breambac-11f20.f
breambac-72i6.r	Ga_group_01	53.37	416	172	6	175	580	2.62843e+06	2.62874e+06	7e-26	122			breambac-72i6	2	same	91107.3	1	-
breambac-61d14.r	Ga_group_01	81.08	74	12	1	483	554	2658197	2658270	2e-08	63.4			breambac-61d14	2	same	52644	1	+
breambac-61i7.r	Ga_group_01	80.95	126	23	1	469	594	2.65985e+06	2.65995e+06	5e-24	115			breambac-61i7	2	same	56680.4	1	+	MAX	breambac-61i7.r
breambac-61d14.f	Ga_group_01	75	168	42	0	10	177	2710841	2710674	2e-11	72.9			breambac-61d14	2	same	52644	-1	+
breambac-11f20.r	Ga_group_01	76.38	254	56	2	341	594	2.71229e+06	2.71209e+06	8e-39	164			breambac-11f20	2	same	83856.5	-1	+		breambac-11f20.r
breambac-81p22.f	Ga_group_01	77.5	120	27	0	205	324	2.71296e+06	2.71306e+06	2e-21	106			breambac-81p22	2	same	70895.1	1	+
breambac-66h8.r	Ga_group_01	83.02	53	9	0	333	385	2.7163e+06	2.71626e+06	2e-06	57.1			breambac-66h8	2	same	9.68722e+06	-1	-
breambac-98b7.r	Ga_group_01	89.6	173	18	0	126	298	2.71644e+06	2.71657e+06	7e-55	218			breambac-98b7	2	same	48953.9	1	+
breambac-34i16.r	Ga_group_01	88.44	173	20	0	132	304	2.71644e+06	2.71657e+06	2e-53	212			breambac-34i16	2	same	67421.2	1	+	MAX	breambac-34i16.r
breambac-61i7.f	Ga_group_01	77.1	262	51	2	75	334	2.71653e+06	2.71634e+06	2e-48	196			breambac-61i7	2	same	56680.4	-1	+		breambac-61i7.f
breambac-21g20.r	Ga_group_01	82.13	235	38	1	1	231	2.71928e+06	2.71946e+06	2e-57	226			breambac-21g20	2	same	66365	1	+
breambac-72i6.f	Ga_group_01	81.47	572	70	9	76	618	2.71946e+06	2.71954e+06	2e-119	432			breambac-72i6	2	same	91107.3	1	-
breambac-110j3.f	Ga_group_01	75.64	509	115	5	164	671	2.71968e+06	2.72008e+06	1e-95	353			breambac-110j3	2	same	45570.9	1	+
breambac-137o1.f	Ga_group_01	78.23	124	25	2	3	126	2731047	2.73114e+06	3e-17	93.5			breambac-137o1	2	same	79063	1	+
breambac-29d20.r	Ga_group_01	75.51	196	46	1	503	696	2.73199e+06	2.73214e+06	2e-34	150			breambac-29d20	2	same	39768.2	1	+
breambac-110j3.r	Ga_group_01	90.11	91	9	0	341	431	2.76525e+06	2.76516e+06	2e-24	117			breambac-110j3	2	same	45570.9	-1	+
breambac-98b7.f	Ga_group_01	67.71	319	91	5	175	493	2.76539e+06	2.76528e+06	1e-22	110			breambac-98b7	2	same	48953.9	-1	+
breambac-58f9.f	Ga_group_01	76.56	192	39	6	4	191	2.76968e+06	2.76983e+06	1e-23	114			breambac-58f9	2	same	67905.8	1	+
breambac-29d20.f	Ga_group_01	77.14	140	23	2	348	478	2.77176e+06	2.77166e+06	8e-17	91.9			breambac-29d20	2	same	39768.2	-1	+
breambac-111n10.f	Ga_group_01	85.14	323	40	4	284	603	2.77663e+06	2.7769e+06	1e-84	316			breambac-111n10	2	same	68633.5	1	+
breambac-136e19.r	Ga_group_01	88.46	182	18	2	547	728	2.78125e+06	2.78144e+06	3e-47	193			breambac-136e19	2	same	66071.5	1	+	MAX	breambac-136e19.r
breambac-34i16.f	Ga_group_01	78.65	431	72	7	87	504	2.78386e+06	2783662	3e-81	305			breambac-34i16	2	same	67421.2	-1	+		breambac-34i16.f
breambac-81p22.r	Ga_group_01	78.65	431	72	7	52	469	2.78386e+06	2783662	3e-81	305			breambac-81p22	2	same	70895.1	-1	+
breambac-21g20.f	Ga_group_01	87.71	179	22	0	333	511	2.78564e+06	2.78547e+06	1e-54	217			breambac-21g20	2	same	66365	-1	+
breambac-114h6.f	Ga_group_01	84.53	446	56	2	55	488	2.78571e+06	2.7861e+06	4e-126	454			breambac-114h6	2	same	51937.5	1	+
breambac-95g19.r	Ga_group_01	83.21	399	58	1	310	699	2.80224e+06	2.80258e+06	2e-109	399			breambac-95g19	2	same	76075.8	1	+
breambac-137o1.r	Ga_group_01	77.78	99	21	1	1	98	2810110	2.81003e+06	2e-11	74.5			breambac-137o1	2	same	79063	-1	+
breambac-40k2.fb120_b1.SCF	Ga_group_01	90.14	142	14	0	199	340	2810417	2810558	4e-44	182			breambac-40k2	2	same	81892	1	+	MAX	breambac-40k2.fb120_b1.SCF
breambac-43f14.f	Ga_group_01	85.53	311	32	3	187	497	2.82301e+06	2823270	2e-79	299			breambac-43f14	2	same	55161.2	1	+
breambac-58f9.r	Ga_group_01	78.95	437	68	7	14	436	2837589	2.83726e+06	4e-82	309			breambac-58f9	2	same	67905.8	-1	+
breambac-114h6.r	Ga_group_01	76.56	192	34	5	535	719	2.83765e+06	2.8375e+06	4e-21	106			breambac-114h6	2	same	51937.5	-1	+
breambac-138n20.f	Ga_group_01	77.54	138	24	1	564	694	2837933	2838070	3e-20	103			breambac-138n20	2	same	54359	1	+
breambac-111n10.r	Ga_group_01	81.76	159	29	0	290	448	2845266	2.84514e+06	5e-38	161			breambac-111n10	2	same	68633.5	-1	+
breambac-136e19.f	Ga_group_01	73.29	277	59	5	19	294	2.84732e+06	2.84712e+06	3e-30	136			breambac-136e19	2	same	66071.5	-1	+		breambac-136e19.f
breambac-73h21.f	Ga_group_01	67.7	226	73	0	480	705	2854489	2854714	3e-40	169			breambac-73h21	2	same	139265	1	+	MAX	breambac-73h21.f
breambac-11m18.f	Ga_group_01	78.95	57	12	0	169	225	2859710	2859766	2e-05	53.9			breambac-11m18	2	same	32582	1	+
breambac-43f14.r	Ga_group_01	82.74	168	28	1	196	362	2.87817e+06	2.87804e+06	3e-39	166			breambac-43f14	2	same	55161.2	-1	+
breambac-95g19.f	Ga_group_01	83.7	184	26	2	28	211	2.87831e+06	2.87818e+06	2e-40	169			breambac-95g19	2	same	76075.8	-1	+
breambac-11m18.r	Ga_group_01	81.05	306	44	3	163	467	2892292	2892000	2e-66	256			breambac-11m18	2	same	32582	-1	+
breambac-138n20.r	Ga_group_01	81.05	306	44	3	193	497	2892292	2892000	2e-66	256			breambac-138n20	2	same	54359	-1	+
breambac-40k2.rb120_b1.SCF	Ga_group_01	82.86	105	16	1	479	581	2892309	2892205	2e-19	99			breambac-40k2	2	same	81892	-1	+		breambac-40k2.rb120_b1.SCF
breambac-102h19.r	Ga_group_01	74.16	89	22	1	1	88	2966101	2966189	2e-07	60.2			breambac-102h19	2	same	92940	1	+	MAX	breambac-102h19.r
breambac-73h21.r	Ga_group_01	74.16	267	69	0	294	560	2993754	2993488	8e-53	210			breambac-73h21	2	same	139265	-1	+		breambac-73h21.r
breambac-42i24.r	Ga_group_01	81.03	195	37	0	465	659	3033481	3033675	2e-47	193			breambac-42i24	2	same	10253	1	+
breambac-132c3.r	Ga_group_01	92.68	246	13	4	407	650	3.03561e+06	3.03586e+06	1e-71	274			breambac-132c3	2	same	99215	1	+	MAX	breambac-132c3.r
breambac-42i24.f	Ga_group_01	70.59	136	35	3	47	178	3043734	3043600	7e-07	58.6			breambac-42i24	2	same	10253	-1	+
breambac-102h19.f	Ga_group_01	68.06	335	103	2	57	388	3059041	3058708	5e-41	171			breambac-102h19	2	same	92940	-1	+		breambac-102h19.f
breambac-54f12.r	Ga_group_01	75.6	209	39	2	270	478	3.06382e+06	3.06397e+06	3e-30	136			breambac-54f12	2	same	106926	1	+
breambac-5m13.r	Ga_group_01	74.05	185	48	0	277	461	3.07115e+06	3.07129e+06	4e-32	142			breambac-5m13	2	same	75429.7	1	+
breambac-100n13.f	Ga_group_01	73.67	471	104	6	12	469	3.1121e+06	3.11246e+06	3e-72	275			breambac-100n13	2	same	68223.8	1	+	MAX	breambac-100n13.f
breambac-132c3.f	Ga_group_01	89.39	198	19	1	465	662	3.13483e+06	3.13463e+06	1e-60	237			breambac-132c3	2	same	99215	-1	+		breambac-132c3.f
breambac-139h21.r	Ga_group_01	86.67	120	16	0	366	485	3.13717e+06	3.13726e+06	1e-31	141			breambac-139h21	2	same	80311.4	1	+
breambac-5m13.f	Ga_group_01	85.77	246	32	1	1	246	3.14658e+06	3.14636e+06	9e-70	267			breambac-5m13	2	same	75429.7	-1	+
breambac-144l2.f	Ga_group_01	88.31	556	65	0	1	556	3.14659e+06	3.14715e+06	0	676			breambac-144l2	2	same	70887.8	1	+
breambac-117i15.f	Ga_group_01	88.13	556	66	0	1	556	3.14659e+06	3.14715e+06	0	673			breambac-117i15	2	same	76389.9	1	+
breambac-79j20.f	Ga_group_01	85.02	307	39	2	290	595	3.15476e+06	3.15503e+06	4e-84	315			breambac-79j20	2	same	62714.3	1	+
breambac-13g18.f	Ga_group_01	82.26	124	22	0	191	314	3.158e+06	3.15809e+06	7e-28	128			breambac-13g18	2	same	65331.4	1	+
breambac-91j15.r	Ga_group_01	87.14	210	24	1	429	638	3.16565e+06	3.16585e+06	1e-60	237			breambac-91j15	2	same	51823.9	1	+
breambac-62h4.f	Ga_group_01	87.14	210	24	1	471	680	3.16565e+06	3.16585e+06	3e-60	236			breambac-62h4	2	same	111289	1	+	MAX	breambac-62h4.f
breambac-54f12.f	Ga_group_01	92.51	494	34	3	143	636	3.17074e+06	3.17034e+06	0	638			breambac-54f12	2	same	106926	-1	+
breambac-100n13.r	Ga_group_01	76.55	226	38	5	292	516	3.18033e+06	3.18017e+06	6e-28	128			breambac-100n13	2	same	68223.8	-1	+		breambac-100n13.r
breambac-79j20.r	Ga_group_01	73.67	338	75	6	44	373	3.21747e+06	3.21722e+06	7e-45	185			breambac-79j20	2	same	62714.3	-1	+
breambac-91j15.f	Ga_group_01	74.9	259	59	3	377	631	3217477	3.21728e+06	1e-40	171			breambac-91j15	2	same	51823.9	-1	+
breambac-144l2.r	Ga_group_01	73.55	344	77	6	352	687	3217477	3.21722e+06	7e-46	188			breambac-144l2	2	same	70887.8	-1	+
breambac-139h21.f	Ga_group_01	73.55	344	77	6	74	409	3217477	3.21722e+06	7e-46	188			breambac-139h21	2	same	80311.4	-1	+
breambac-20b9.r	Ga_group_01	73.94	426	101	9	194	615	3.2175e+06	3.21782e+06	1e-60	237			breambac-20b9	2	same	89289	1	+
breambac-47p22.r	Ga_group_01	73.24	142	33	3	208	344	3.22013e+06	3.22024e+06	1e-11	74.5			breambac-47p22	2	same	56841.2	1	+
breambac-117i15.r	Ga_group_01	89.06	128	13	1	349	475	3.22298e+06	3.22288e+06	2e-34	150			breambac-117i15	2	same	76389.9	-1	+
breambac-13g18.r	Ga_group_01	82.56	430	65	3	29	450	3.22333e+06	3.22298e+06	6e-110	400			breambac-13g18	2	same	65331.4	-1	+
breambac-33n16.f	Ga_group_01	80	105	20	1	2	106	3.24963e+06	3249711	8e-17	91.9			breambac-33n16	2	same	66199.6	1	+
breambac-144j22.f	Ga_group_01	81.18	356	57	6	317	669	3.25055e+06	3.25082e+06	2e-76	290			breambac-144j22	2	same	91127.5	1	+	MAX	breambac-144j22.f
breambac-62h4.r	Ga_group_01	82.73	440	61	5	2	428	3.27694e+06	3.27661e+06	3e-103	378			breambac-62h4	2	same	111289	-1	+		breambac-62h4.r
breambac-47p22.f	Ga_group_01	82.77	476	68	4	1	464	3276970	3.27661e+06	2e-117	426			breambac-47p22	2	same	56841.2	-1	+
breambac-29k24.f	Ga_group_01	80.56	72	14	0	136	207	3.30014e+06	3.30008e+06	1e-10	71.3			breambac-29k24	2	same	1.63314e+07	-1	-
breambac-20b9.f	Ga_group_01	84.98	406	49	3	253	653	3.30679e+06	3.30646e+06	9e-112	407			breambac-20b9	2	same	89289	-1	+
breambac-33n16.r	Ga_group_01	76.81	207	38	5	1	199	3.31583e+06	3.31567e+06	6e-25	118			breambac-33n16	2	same	66199.6	-1	+
breambac-75o6.f	Ga_group_01	81.97	355	54	5	1	354	3.33051e+06	3.33077e+06	3e-81	305			breambac-75o6	2	same	10052.5	1	+
breambac-75o6.r	Ga_group_01	78.34	674	110	13	10	673	3.34056e+06	3.34001e+06	2e-120	435			breambac-75o6	2	same	10052.5	-1	+
breambac-144j22.r	Ga_group_01	81.07	449	67	3	1	431	3.34168e+06	3.34129e+06	3e-107	391			breambac-144j22	2	same	91127.5	-1	+	Contig End	breambac-144j22.r
breambac-103h5.r	Ga_group_01	76.01	396	81	3	291	674	3.35766e+06	3.35796e+06	1e-72	277			breambac-103h5	2	same	66490.2	1	+	Contig Start	breambac-103h5.r
breambac-7c23.r	Ga_group_01	88.39	353	38	3	37	389	3.36411e+06	3.36444e+06	3e-111	405			breambac-7c23	2	same	49733.5	1	+
breambac-135a19.f	Ga_group_01	75	108	27	0	3	110	3.37949e+06	3.37957e+06	1e-15	87.2			breambac-135a19	2	same	99150	1	+
breambac-32l12.r	Ga_group_01	77.52	427	85	7	2	419	3.38857e+06	3388935	1e-81	307			breambac-32l12	2	same	103942	1	+
breambac-7c23.f	Ga_group_01	82.42	182	31	1	32	213	3.41385e+06	3.41371e+06	5e-43	179			breambac-7c23	2	same	49733.5	-1	+
breambac-62f7.r	Ga_group_01	94.01	217	5	1	409	625	3.41845e+06	3.41867e+06	2e-69	266			breambac-62f7	2	same	92838.1	1	+	MAX	breambac-62f7.r
breambac-103h5.f	Ga_group_01	85.65	216	31	0	440	655	3.42415e+06	3.42399e+06	4e-63	245			breambac-103h5	2	same	66490.2	-1	+		breambac-103h5.f
breambac-19p6.r	Ga_group_01	97.26	73	2	0	359	431	3.42663e+06	3.42668e+06	9e-23	110			breambac-19p6	2	same	85279.6	1	+
breambac-39j24.f	Ga_group_01	89.98	429	39	3	210	638	3.42729e+06	3.4277e+06	3e-144	515			breambac-39j24	2	same	78424.6	1	+
breambac-2e5.r	Ga_group_01	87.63	493	51	5	201	692	3.42729e+06	3.42774e+06	4e-146	521			breambac-2e5	2	same	84619.4	1	+
breambac-111e15.r	Ga_group_01	88.65	326	33	3	212	537	3.42729e+06	3.42757e+06	6e-101	370			breambac-111e15	2	same	125195	1	+	MAX	breambac-111e15.r
breambac-123e16.r	Ga_group_01	94.39	214	11	1	359	572	3.44397e+06	3.44419e+06	2e-77	293			breambac-123e16	2	same	92325.1	1	+
breambac-79f8.f	Ga_group_01	85.71	175	19	3	155	326	3.46598e+06	3.46611e+06	3e-39	166			breambac-79f8	2	same	68502.5	1	+
breambac-52h10.r	Ga_group_01	86.34	183	20	3	515	697	3.46631e+06	3.46645e+06	1e-40	171			breambac-52h10	2	same	75055.8	1	+
breambac-135a19.r	Ga_group_01	82.84	746	97	8	1	736	3.47864e+06	3477907	0	646			breambac-135a19	2	same	99150	-1	+
breambac-16a4.f	Ga_group_01	84.95	432	49	3	201	632	3.47872e+06	3.47827e+06	5e-118	427	3		breambac-16a4	2	same	1.06098e+07	-1	-
breambac-26g16.f	Ga_group_01	85	400	37	3	327	715	3.47889e+06	3479214	4e-105	385			breambac-26g16	2	same	70395.8	1	+
breambac-32l12.f	Ga_group_01	87.8	254	16	3	410	662	3.49251e+06	3.4923e+06	6e-67	258			breambac-32l12	2	same	103942	-1	+
breambac-24b21.f	Ga_group_01	73.49	83	22	0	651	733	3.50347e+06	3.50341e+06	3e-08	63.4	3		breambac-24b21	2	same	1.05847e+07	-1	-
breambac-142p5.r	Ga_group_01	75.82	637	128	8	3	625	3.5052e+06	3.50472e+06	5e-117	424	3		breambac-142p5	2	same	1.05833e+07	-1	-
breambac-39j24.r	Ga_group_01	79.32	730	113	7	38	734	3.50571e+06	3.50516e+06	2e-160	569			breambac-39j24	2	same	78424.6	-1	+
breambac-62f7.f	Ga_group_01	84.76	210	28	2	1	209	3.51129e+06	3511102	4e-52	209			breambac-62f7	2	same	92838.1	-1	+		breambac-62f7.f
breambac-19p6.f	Ga_group_01	86.96	46	6	0	1	46	3.51191e+06	3.51187e+06	7e-06	55.5			breambac-19p6	2	same	85279.6	-1	+
breambac-2e5.f	Ga_group_01	87.23	47	6	0	8	54	3.51191e+06	3.51187e+06	2e-06	57.1			breambac-2e5	2	same	84619.4	-1	+
breambac-133g1.r	Ga_group_01	77.97	286	60	3	210	495	3.52149e+06	3521703	4e-64	248			breambac-133g1	2	same	65471.2	1	+	MAX	breambac-133g1.r
breambac-79f8.r	Ga_group_01	72.06	204	55	2	696	899	3.53448e+06	3.53432e+06	1e-26	125			breambac-79f8	2	same	68502.5	-1	+
breambac-123e16.f	Ga_group_01	84.08	358	49	3	3	353	3.53629e+06	3.53597e+06	2e-95	351			breambac-123e16	2	same	92325.1	-1	+
breambac-52h10.f	Ga_group_01	70.49	515	109	12	1	503	3.54137e+06	3.541e+06	4e-41	172			breambac-52h10	2	same	75055.8	-1	+
breambac-26g16.r	Ga_group_01	85.93	391	41	3	1	377	3.54929e+06	3.54891e+06	4e-110	400			breambac-26g16	2	same	70395.8	-1	+
breambac-111e15.f	Ga_group_01	71.62	451	95	10	52	498	3.55248e+06	3.55216e+06	3e-43	179			breambac-111e15	2	same	125195	-1	+		breambac-111e15.f
breambac-50n21.r	Ga_group_01	86.22	196	25	1	386	581	3.56715e+06	3.5673e+06	5e-54	215			breambac-50n21	2	same	57074.2	1	+	MAX	breambac-50n21.r
breambac-133g1.f	Ga_group_01	78.12	521	91	11	214	718	3.58696e+06	3.58656e+06	1e-92	343			breambac-133g1	2	same	65471.2	-1	+		breambac-133g1.f
breambac-72f7.r	Ga_group_01	85.12	168	24	1	678	844	3.59657e+06	3.5967e+06	6e-43	179			breambac-72f7	2	same	70653.2	1	+
breambac-74f21.r	Ga_group_01	72.16	370	86	6	60	428	3605255	3605608	1e-45	187			breambac-74f21	2	same	63942	1	+
breambac-25j6.r	Ga_group_01	86.14	368	47	3	97	464	3.6202e+06	3.62054e+06	1e-107	393			breambac-25j6	2	same	78458.2	1	+	MAX	breambac-25j6.r
breambac-50n21.f	Ga_group_01	73.39	233	57	3	33	264	3.62422e+06	3.62405e+06	3e-29	133			breambac-50n21	2	same	57074.2	-1	+		breambac-50n21.f
breambac-105c16.r	Ga_group_01	78.38	370	77	2	1	369	3624267	3.62455e+06	2e-73	278			breambac-105c16	2	same	86305.8	1	+
breambac-76j4.f	Ga_group_01	79.71	138	20	2	83	213	3.63815e+06	3.63805e+06	4e-20	103			breambac-76j4	2	same	2.33772e+07	-1	-
breambac-124f19.f	Ga_group_01	84.33	702	92	5	69	758	3656864	3.65742e+06	0	686			breambac-124f19	2	same	64429.2	1	+	MAX	breambac-124f19.f
breambac-72f7.f	Ga_group_01	84.87	152	13	1	493	644	3667221	3.66711e+06	1e-29	134			breambac-72f7	2	same	70653.2	-1	+
breambac-74f21.f	Ga_group_01	75.35	142	29	3	504	641	3669197	3669058	4e-14	82.4			breambac-74f21	2	same	63942	-1	+
breambac-25j6.f	Ga_group_01	80.71	534	74	9	1	533	3.69866e+06	3.69824e+06	2e-108	396			breambac-25j6	2	same	78458.2	-1	+		breambac-25j6.f
breambac-109l3.r	Ga_group_01	91.69	301	25	0	68	368	3.70066e+06	3.70094e+06	5e-91	337			breambac-109l3	2	same	67177.3	1	+
breambac-116h14.r	Ga_group_01	90.99	333	30	0	187	519	3.7015e+06	3.70125e+06	1e-118	429	2		breambac-116h14	2	same	1.77049e+06	-1	+
breambac-44m22.f	Ga_group_01	86.45	273	36	1	484	756	3702158	3.70237e+06	4e-82	309			breambac-44m22	2	same	74022.2	1	+
breambac-105c16.f	Ga_group_01	79.38	548	79	9	1	548	3.71057e+06	3.71009e+06	2e-100	369			breambac-105c16	2	same	86305.8	-1	+
breambac-129e22.f	Ga_group_01	93.72	414	24	1	128	541	3.71875e+06	3719147	1e-159	565			breambac-129e22	2	same	86414.3	1	+	MAX	breambac-129e22.f
breambac-124f19.r	Ga_group_01	86.56	558	53	5	9	556	3.72129e+06	3.72084e+06	5e-158	561			breambac-124f19	2	same	64429.2	-1	+		breambac-124f19.r
breambac-104i4.r	Ga_group_01	83.75	480	54	3	275	741	3.72477e+06	3.72433e+06	1e-123	446	2		breambac-104i4	2	same	1.79375e+06	-1	+
breambac-59e11.f	Ga_group_01	78.18	165	33	1	1	162	3.73163e+06	3.73151e+06	3e-30	136	2		breambac-59e11	2	same	1.80062e+06	-1	+
breambac-109l3.f	Ga_group_01	75.38	260	62	1	331	588	3.76784e+06	3.76764e+06	7e-47	191			breambac-109l3	2	same	67177.3	-1	+
breambac-44m22.r	Ga_group_01	93.06	533	31	2	156	688	3.77618e+06	3775668	0	703			breambac-44m22	2	same	74022.2	-1	+
breambac-8f10.f	Ga_group_01	76.92	286	54	4	442	720	3.78903e+06	3.78947e+06	8e-48	194			breambac-8f10	2	same	67753.7	1	+
breambac-35j14.f	Ga_group_01	80.29	624	104	6	1	620	3.79005e+06	3790555	1e-146	523			breambac-35j14	2	same	71190.8	1	+	MAX	breambac-35j14.f
breambac-121e8.r	Ga_group_01	83.67	294	30	2	40	327	3.79871e+06	3.79893e+06	1e-70	271			breambac-121e8	2	same	62547.7	1	+
breambac-129e22.r	Ga_group_01	78.38	555	97	6	84	622	3.80516e+06	3.80474e+06	1e-114	416			breambac-129e22	2	same	86414.3	-1	+		breambac-129e22.r
breambac-42f7.f	Ga_group_01	72.83	622	145	5	4	606	3.83582e+06	3.83654e+06	5e-118	427			breambac-42f7	2	same	95793.4	1	+	MAX	breambac-42f7.f
breambac-143g20.f	Ga_group_01	77.87	253	42	3	387	638	3.84933e+06	3.84952e+06	4e-43	179			breambac-143g20	2	same	67498.9	1	+
breambac-44b4.f	Ga_group_01	91.67	276	22	1	1	276	3.85559e+06	3.85586e+06	2e-96	356			breambac-44b4	2	same	60821.5	1	+
breambac-8f10.r	Ga_group_01	91.18	431	33	5	308	737	3.85678e+06	3.85639e+06	1e-144	516			breambac-8f10	2	same	67753.7	-1	+
breambac-35j14.r	Ga_group_01	77.22	698	129	10	100	781	3.86125e+06	3.86072e+06	1e-132	477			breambac-35j14	2	same	71190.8	-1	+		breambac-35j14.r
breambac-121e8.f	Ga_group_01	75.72	626	120	12	90	699	3.86126e+06	3.86079e+06	2e-99	366			breambac-121e8	2	same	62547.7	-1	+
breambac-123i11.r	Ga_group_01	85.64	369	48	2	274	637	3.86454e+06	3.86486e+06	6e-108	394			breambac-123i11	2	same	67079.2	1	+
breambac-115n18.f	Ga_group_01	85.11	188	24	3	1	187	3.86756e+06	3.86771e+06	1e-43	180			breambac-115n18	2	same	82120.5	1	+
breambac-74m1.r	Ga_group_01	76.36	165	36	3	1	164	3867581	3.86771e+06	2e-22	110			breambac-74m1	2	same	88943.2	1	+	MAX	breambac-74m1.r
breambac-33l3.f	Ga_group_01	83.95	162	22	3	1	161	3.86758e+06	3.86771e+06	5e-33	145			breambac-33l3	2	same	88940.1	1	+
breambac-44b4.r	Ga_group_01	84.52	633	87	7	16	645	3.91641e+06	3.91593e+06	3e-174	614			breambac-44b4	2	same	60821.5	-1	+
breambac-143g20.r	Ga_group_01	75.44	285	51	7	174	447	3.91683e+06	3.91662e+06	5e-33	145			breambac-143g20	2	same	67498.9	-1	+
breambac-123i11.f	Ga_group_01	79.46	297	55	4	316	606	3.93162e+06	3.93139e+06	9e-61	237			breambac-123i11	2	same	67079.2	-1	+
breambac-42f7.r	Ga_group_01	79.1	512	89	7	270	764	3.93162e+06	3931223	2e-106	389			breambac-42f7	2	same	95793.4	-1	+		breambac-42f7.r
breambac-138i24.f	Ga_group_01	78.04	378	58	6	11	376	3.94527e+06	3.94555e+06	2e-59	232			breambac-138i24	2	same	61875.9	1	+	MAX	breambac-138i24.f
breambac-115n18.r	Ga_group_01	82.9	269	27	5	1	269	3.94968e+06	3.94946e+06	2e-53	212			breambac-115n18	2	same	82120.5	-1	+
breambac-33l3.r	Ga_group_01	80.83	433	53	7	262	680	3.95652e+06	3.9562e+06	5e-86	321			breambac-33l3	2	same	88940.1	-1	+
breambac-74m1.f	Ga_group_01	72.11	294	53	6	293	572	3.95652e+06	3.95631e+06	1e-23	114			breambac-74m1	2	same	88943.2	-1	+		breambac-74m1.f
breambac-69e15.f	Ga_group_01	78.22	450	85	4	284	729	3.99129e+06	3.99167e+06	3e-100	369			breambac-69e15	2	same	67472	1	+	MAX	breambac-69e15.f
breambac-138i24.r	Ga_group_01	88.89	342	30	2	2	335	4.00715e+06	4.00688e+06	2e-110	402			breambac-138i24	2	same	61875.9	-1	+		breambac-138i24.r
breambac-80k8.f	Ga_group_01	82.63	167	26	1	476	642	4.0124e+06	4.01252e+06	8e-38	161			breambac-80k8	2	same	64958.9	1	+
breambac-123k24.r	Ga_group_01	85.71	238	33	1	332	569	4.02657e+06	4.02675e+06	6e-68	261			breambac-123k24	2	same	51017.9	1	+
breambac-29m18.f	Ga_group_01	83.91	460	57	5	32	476	4.04657e+06	4.04694e+06	2e-118	429			breambac-29m18	2	same	75909.4	1	+	MAX	breambac-29m18.f
breambac-69e15.r	Ga_group_01	74.89	219	45	3	237	445	4.05876e+06	4.05859e+06	1e-29	134			breambac-69e15	2	same	67472	-1	+		breambac-69e15.r
breambac-103d11.f	Ga_group_01	75.34	292	69	1	32	323	4.05929e+06	4.05951e+06	2e-58	229			breambac-103d11	2	same	80915	1	+
breambac-132i13.f	Ga_group_01	78.34	217	44	1	29	245	4059303	4059516	1e-44	183			breambac-132i13	2	same	79420	1	+
breambac-80k8.r	Ga_group_01	72.05	229	56	2	370	590	4.07736e+06	4.07718e+06	3e-29	133			breambac-80k8	2	same	64958.9	-1	+
breambac-123k24.f	Ga_group_01	78.74	174	30	1	1	174	4.07759e+06	4.07746e+06	1e-31	141			breambac-123k24	2	same	51017.9	-1	+
breambac-96o6.f	Ga_group_01	86.1	223	21	3	356	573	4.07864e+06	4.07881e+06	1e-54	217			breambac-96o6	2	same	61056	1	+
breambac-85k19.r	Ga_group_01	81.94	216	28	1	12	227	4.10622e+06	4.1064e+06	8e-48	194			breambac-85k19	2	same	60477.8	1	+	MAX	breambac-85k19.r
breambac-29m18.r	Ga_group_01	88.83	197	22	0	276	472	4.12248e+06	4122298	1e-62	244			breambac-29m18	2	same	75909.4	-1	+		breambac-29m18.r
breambac-132i13.r	Ga_group_01	71.72	99	25	2	14	111	4138723	4138627	0.0005	49.1			breambac-132i13	2	same	79420	-1	+
breambac-96o6.r	Ga_group_01	88.87	728	67	9	1	723	4.1397e+06	4.13915e+06	0	795			breambac-96o6	2	same	61056	-1	+
breambac-103d11.r	Ga_group_01	91.9	642	49	1	1	642	4.1402e+06	4.13971e+06	0	841			breambac-103d11	2	same	80915	-1	+
breambac-29d22.r	Ga_group_01	91.78	730	60	0	1	730	4.14415e+06	4.14472e+06	0	969			breambac-29d22	2	same	78666.8	1	+	MAX	breambac-29d22.r
breambac-143e9.r	Ga_group_01	89.16	286	30	1	16	300	4.15108e+06	4.1513e+06	2e-93	347			breambac-143e9	2	same	59128.2	1	+
breambac-140f22.r	Ga_group_01	89.47	285	30	0	4	288	4151085	4.1513e+06	6e-97	358			breambac-140f22	2	same	61523.8	1	+
breambac-85k19.f	Ga_group_01	83.08	721	86	9	1	700	4.16669e+06	4.16596e+06	1e-176	622			breambac-85k19	2	same	60477.8	-1	+		breambac-85k19.f
breambac-58d1.r	Ga_group_01	77.97	413	82	4	7	418	4.16828e+06	4.16873e+06	5e-86	321			breambac-58d1	2	same	105926	1	+
breambac-37d18.r	Ga_group_01	75.31	567	100	9	175	721	4174244	4174664	2e-86	323			breambac-37d18	2	same	1.63038e+07	1	+
breambac-122f7.f	Ga_group_01	83.23	316	47	2	35	345	4.17796e+06	4.17825e+06	4e-82	309			breambac-122f7	2	same	106491	1	+
breambac-143e9.f	Ga_group_01	84.68	124	19	0	230	353	4.21021e+06	4.21012e+06	1e-30	137			breambac-143e9	2	same	59128.2	-1	+
breambac-140f22.f	Ga_group_01	85.28	231	29	2	8	237	4.21261e+06	4212408	3e-60	236			breambac-140f22	2	same	61523.8	-1	+
breambac-92l18.f	Ga_group_01	75.68	329	66	7	302	623	4.21913e+06	4219381	7e-47	191			breambac-92l18	2	same	74564.5	1	+	MAX	breambac-92l18.f
breambac-29d22.f	Ga_group_01	78.59	383	72	3	234	608	4.22282e+06	4.22253e+06	3e-82	309			breambac-29d22	2	same	78666.8	-1	+		breambac-29d22.f
breambac-58d1.f	Ga_group_01	84.42	308	47	1	414	720	4.2742e+06	4.27397e+06	7e-88	328			breambac-58d1	2	same	105926	-1	+
breambac-133m9.f	Ga_group_01	86.89	61	8	0	7	67	4.27452e+06	4.27456e+06	4e-11	72.9			breambac-133m9	2	same	66588.3	1	+	MAX	breambac-133m9.f
breambac-122f7.r	Ga_group_01	83.27	257	43	0	269	525	4.28445e+06	4.28425e+06	4e-71	272			breambac-122f7	2	same	106491	-1	+
breambac-92l18.r	Ga_group_01	78.45	413	71	5	359	755	4.2937e+06	4.29336e+06	4e-81	305			breambac-92l18	2	same	74564.5	-1	+		breambac-92l18.r
breambac-43c22.r	Ga_group_01	87.7	309	37	1	1	309	4.3339e+06	4.33416e+06	7e-98	361			breambac-43c22	2	same	73325	1	+	MAX	breambac-43c22.r
breambac-133m9.r	Ga_group_01	89.33	328	33	2	163	488	4.3411e+06	4.34078e+06	6e-107	391			breambac-133m9	2	same	66588.3	-1	+		breambac-133m9.r
breambac-86o9.f	Ga_group_01	82.87	251	24	6	1	250	4.34857e+06	4.34878e+06	4e-45	185			breambac-86o9	2	same	79435.7	1	+
breambac-80g7.r	Ga_group_01	79.67	182	37	0	214	395	4.34884e+06	4348975	3e-39	166			breambac-80g7	2	same	86062.2	1	+
breambac-41d6.r	Ga_group_01	85.77	239	26	2	446	676	4.38321e+06	4.38339e+06	1e-62	244			breambac-41d6	2	same	88936.9	1	+	MAX	breambac-41d6.r
breambac-58i12.f	Ga_group_01	87.98	341	30	2	3	332	4.39426e+06	4394584	3e-103	378			breambac-58i12	2	same	1.3069e+07	1	+
breambac-43c22.f	Ga_group_01	74.58	118	28	2	369	485	4.40722e+06	4.40713e+06	2e-11	74.5			breambac-43c22	2	same	73325	-1	+		breambac-43c22.f
breambac-86o9.r	Ga_group_01	84.64	371	52	2	113	478	4.42801e+06	4427721	3e-105	385			breambac-86o9	2	same	79435.7	-1	+
breambac-54f10.r	Ga_group_01	76.58	316	69	3	116	431	4.4294e+06	4.42967e+06	3e-60	236			breambac-54f10	2	same	42747.2	1	+	MAX	breambac-54f10.r
breambac-80g7.f	Ga_group_01	81	100	18	1	1	100	4434898	4.43482e+06	2e-16	90.3			breambac-80g7	2	same	86062.2	-1	+
breambac-54f10.f	Ga_group_01	79.33	450	81	4	93	533	4472146	4.47176e+06	2e-98	362			breambac-54f10	2	same	42747.2	-1	+	Contig End	breambac-54f10.f
breambac-41d6.f	Ga_group_01	78.54	508	95	5	87	585	4472146	4.47172e+06	2e-107	393			breambac-41d6	2	same	88936.9	-1	+		breambac-41d6.f
breambac-127k18.r	Ga_group_01	81.88	425	71	4	114	534	4.47221e+06	4.4726e+06	1e-106	389			breambac-127k18	2	same	58617.8	1	+	Contig Start	breambac-127k18.r
breambac-71g22.f	Ga_group_01	75	304	67	3	142	439	4.52869e+06	4.52913e+06	1e-50	204			breambac-71g22	2	same	75345.2	1	+	MAX	breambac-71g22.f
breambac-127k18.f	Ga_group_01	79.49	156	31	1	562	717	4.53083e+06	4.53071e+06	2e-25	120			breambac-127k18	2	same	58617.8	-1	+		breambac-127k18.f
breambac-143g17.r	Ga_group_01	72.79	136	33	2	2	134	4.5315e+06	4.5316e+06	2e-12	77.7			breambac-143g17	2	same	1.63886e+07	1	-
breambac-16b5.r	Ga_group_01	88.75	80	9	0	329	408	4.53238e+06	4.53244e+06	3e-19	99.9			breambac-16b5	2	same	54866.3	1	+
breambac-115i15.r	Ga_group_01	81.59	402	66	4	132	530	4.55059e+06	4.55092e+06	2e-97	359			breambac-115i15	2	same	48191.4	1	+
breambac-7b4.r	Ga_group_01	76.15	239	49	2	108	341	4.55378e+06	4.55396e+06	8e-41	171			breambac-7b4	2	same	1.96717e+06	1	-
breambac-49d6.r	Ga_group_01	80.45	179	35	0	175	353	4.56583e+06	4.56597e+06	1e-41	174			breambac-49d6	2	same	62092.8	1	+	MAX	breambac-49d6.r
breambac-16b5.f	Ga_group_01	91.67	156	13	0	113	268	4.58725e+06	4.5871e+06	1e-51	207			breambac-16b5	2	same	54866.3	-1	+
breambac-115i15.f	Ga_group_01	84.4	141	19	3	455	594	4.59878e+06	4.59865e+06	7e-28	128			breambac-115i15	2	same	48191.4	-1	+
breambac-71g22.r	Ga_group_01	71.9	395	93	6	91	475	4.60403e+06	4.60374e+06	2e-49	199			breambac-71g22	2	same	75345.2	-1	+		breambac-71g22.r
breambac-49d6.f	Ga_group_01	87.61	452	47	2	190	638	4627921	4627522	7e-141	504			breambac-49d6	2	same	62092.8	-1	+	Contig End	breambac-49d6.f
breambac-11f5.f	Ga_group_01	81.1	688	98	9	59	733	4.63016e+06	4.63072e+06	1e-155	553			breambac-11f5	2	same	66417.8	1	+	Contig Start	breambac-11f5.f
breambac-11f5.r	Ga_group_01	73.01	226	53	1	1	218	4.69658e+06	4.69641e+06	4e-33	145			breambac-11f5	2	same	66417.8	-1	+	Contig End	breambac-11f5.r
breambac-19f21.f	Ga_group_01	75.54	139	33	1	358	495	4.7152e+06	4715309	9e-21	104			breambac-19f21	2	same	47704.1	1	+	Contig Start	breambac-19f21.f
breambac-119j18.r	Ga_group_01	83.39	283	32	4	302	584	4.7184e+06	4718609	3e-60	236			breambac-119j18	2	same	65346.6	1	+
breambac-62a16.f	Ga_group_01	83.39	283	32	4	305	587	4.7184e+06	4718609	3e-60	236			breambac-62a16	2	same	78919.2	1	+
breambac-99d16.r	Ga_group_01	83.8	216	30	3	454	665	4.7223e+06	4.72249e+06	1e-49	201			breambac-99d16	2	same	76257.3	1	+	MAX	breambac-99d16.r
breambac-19f21.r	Ga_group_01	80.88	434	70	5	184	617	4.76291e+06	4.76258e+06	2e-99	366			breambac-19f21	2	same	47704.1	-1	+		breambac-19f21.r
breambac-119j18.f	Ga_group_01	85.92	284	23	4	134	401	4.78375e+06	4.78353e+06	3e-69	266			breambac-119j18	2	same	65346.6	-1	+
breambac-86g9.f	Ga_group_01	73.23	269	63	5	220	482	4.78468e+06	4.78489e+06	1e-32	144			breambac-86g9	2	same	51129.5	1	+	MAX	breambac-86g9.f
breambac-62a16.r	Ga_group_01	80.11	176	30	3	93	267	4.79732e+06	4.79719e+06	7e-31	137			breambac-62a16	2	same	78919.2	-1	+
breambac-99d16.f	Ga_group_01	89.2	250	27	0	124	373	4.79856e+06	4.7983e+06	4e-83	312			breambac-99d16	2	same	76257.3	-1	+		breambac-99d16.f
breambac-86g9.r	Ga_group_01	71.88	192	41	5	147	328	4.83581e+06	4.83567e+06	2e-11	74.5			breambac-86g9	2	same	51129.5	-1	+	Contig End	breambac-86g9.r
breambac-60a11.r	Ga_group_01	80.31	325	52	1	20	344	4.83679e+06	4.83703e+06	1e-75	286			breambac-60a11	2	same	72469.5	1	+	Contig Start	breambac-60a11.r
breambac-1c3.f	Ga_group_01	81.19	319	48	2	39	357	4.8368e+06	4.83703e+06	4e-74	282			breambac-1c3	2	same	53819.8	1	+
breambac-126n8.r	Ga_group_01	83.6	189	30	1	333	520	4.86358e+06	4863721	2e-47	193			breambac-126n8	2	same	3.59026e+06	1	-
breambac-15k12.f	Ga_group_01	87.1	217	28	0	12	228	4.88626e+06	4.88643e+06	2e-66	256			breambac-15k12	2	same	51668.7	1	+
breambac-1c3.r	Ga_group_01	82.73	220	36	2	220	437	4.89062e+06	4.89045e+06	1e-52	210			breambac-1c3	2	same	53819.8	-1	+
breambac-140f6.r	Ga_group_01	95.98	373	14	1	47	419	4.89863e+06	4.89899e+06	2e-150	535			breambac-140f6	2	same	65280.8	1	+	MAX	breambac-140f6.r
breambac-76l4.r	Ga_group_01	80.36	224	43	1	1	223	4.90451e+06	4.90469e+06	1e-51	207			breambac-76l4	2	same	33414.3	1	+
breambac-60a11.f	Ga_group_01	92.06	126	10	0	225	350	4.90926e+06	4.90917e+06	3e-40	169			breambac-60a11	2	same	72469.5	-1	+		breambac-60a11.f
breambac-12n18.f	Ga_group_01	85.34	648	60	12	1	627	4.92298e+06	4.92355e+06	2e-150	535			breambac-12n18	2	same	58219.5	1	+
breambac-78n6.r	Ga_group_01	84.85	660	65	12	1	639	4.92306e+06	4.92359e+06	2e-151	538			breambac-78n6	2	same	58153.2	1	+
breambac-11c19.r	Ga_group_01	94.74	304	15	1	475	778	4.92384e+06	4.92409e+06	2e-116	423			breambac-11c19	2	same	63397.2	1	+	MAX	breambac-11c19.r
breambac-76l4.f	Ga_group_01	91.8	244	16	3	421	664	4.93793e+06	4.93771e+06	7e-78	294			breambac-76l4	2	same	33414.3	-1	+
breambac-15k12.r	Ga_group_01	91.8	244	16	3	394	637	4.93793e+06	4.93771e+06	7e-78	294			breambac-15k12	2	same	51668.7	-1	+
breambac-140f6.f	Ga_group_01	84.34	83	12	1	439	521	4.96391e+06	4.96385e+06	6e-14	82.4			breambac-140f6	2	same	65280.8	-1	+		breambac-140f6.f
breambac-117a4.f	Ga_group_01	69.39	294	77	5	175	460	4.97825e+06	4.97852e+06	7e-26	122			breambac-117a4	2	same	34800.8	1	+	MAX	breambac-117a4.f
breambac-12n18.r	Ga_group_01	84.76	269	34	3	4	271	4.9812e+06	4.98096e+06	2e-68	263			breambac-12n18	2	same	58219.5	-1	+
breambac-78n6.f	Ga_group_01	85.71	287	35	2	1	287	4.98121e+06	4.98096e+06	4e-80	301			breambac-78n6	2	same	58153.2	-1	+
breambac-11c19.f	Ga_group_01	76.13	222	43	3	520	737	4.98724e+06	4.98707e+06	5e-33	145			breambac-11c19	2	same	63397.2	-1	+		breambac-11c19.f
breambac-117a4.r	Ga_group_01	75	336	74	3	15	344	5.01305e+06	5.01279e+06	6e-58	228			breambac-117a4	2	same	34800.8	-1	+	Contig End	breambac-117a4.r
breambac-107i2.r	Ga_group_01	79.11	359	61	5	309	661	5.01494e+06	5.01524e+06	9e-71	271			breambac-107i2	2	same	49781.9	1	+	Contig Start	breambac-107i2.r
breambac-68j20.r	Ga_group_01	66.67	375	102	7	35	399	5.04206e+06	5.04234e+06	9e-22	107			breambac-68j20	2	same	48717.7	1	+	MAX	breambac-68j20.r
breambac-107i2.f	Ga_group_01	71.03	397	88	10	2	392	5064724	5.06445e+06	7e-31	137			breambac-107i2	2	same	49781.9	-1	+		breambac-107i2.f
breambac-44i10.r	Ga_group_01	76.13	662	121	14	108	739	5.07027e+06	5.07053e+06	3e-100	369			breambac-44i10	2	same	106443	1	+	MAX	breambac-44i10.r
breambac-68j20.f	Ga_group_01	72.75	499	112	8	109	602	5.09078e+06	5.09041e+06	2e-67	259			breambac-68j20	2	same	48717.7	-1	+		breambac-68j20.f
breambac-37j20.r	Ga_group_01	78.46	130	27	1	1	130	5.10519e+06	5.10532e+06	2e-22	109			breambac-37j20	2	same	120232	1	+	MAX	breambac-37j20.r
breambac-114l13.f	Ga_group_01	91.94	310	19	2	353	662	5106864	5.10615e+06	5e-106	388			breambac-114l13	2	same	77090.8	-1	-
breambac-121k13.r	Ga_group_01	89.34	244	26	0	102	345	5.11477e+06	5.11498e+06	8e-79	297			breambac-121k13	2	same	62957.8	1	+
breambac-38f6.f	Ga_group_01	74.53	534	114	10	203	721	5.12671e+06	5.12712e+06	6e-76	288			breambac-38f6	2	same	82023.1	1	+
breambac-19e18.f	Ga_group_01	67.79	267	70	6	79	340	5.15346e+06	5.15366e+06	3e-13	79.2			breambac-19e18	2	same	57727.2	1	+
breambac-44i10.f	Ga_group_01	71.78	241	58	4	256	492	5.17671e+06	5.17653e+06	2e-25	120			breambac-44i10	2	same	106443	-1	+		breambac-44i10.f
breambac-121k13.f	Ga_group_01	82.56	172	21	4	253	416	5.17773e+06	5.17759e+06	3e-29	133			breambac-121k13	2	same	62957.8	-1	+
breambac-108b15.rb120_b1.SCF	Ga_group_01	83.72	86	12	1	216	299	5180174	5180259	4e-14	82			breambac-108b15	2	same	49824	1	+
breambac-114l13.r	Ga_group_01	74.85	171	40	3	2	172	5.18324e+06	5.18311e+06	1e-21	107			breambac-114l13	2	same	77090.8	-1	-
breambac-38f6.r	Ga_group_01	78.72	188	32	3	440	620	5.20873e+06	5.20859e+06	3e-30	136			breambac-38f6	2	same	82023.1	-1	+
breambac-54n7.r	Ga_group_01	83.03	218	34	2	344	561	5210033	5.2102e+06	4e-52	209			breambac-54n7	2	same	41557	1	+	MAX	breambac-54n7.r
breambac-19e18.r	Ga_group_01	75.22	343	64	8	44	373	5.21119e+06	5.21093e+06	3e-43	179			breambac-19e18	2	same	57727.2	-1	+
breambac-105p7.f	Ga_group_01	91.67	60	5	0	1	60	5.22073e+06	5.22077e+06	1e-13	80.8			breambac-105p7	2	same	32700.5	1	-
breambac-37j20.f	Ga_group_01	70.07	147	41	2	59	202	5.22542e+06	5.22531e+06	9e-12	74.5			breambac-37j20	2	same	120232	-1	+		breambac-37j20.f
breambac-108b15.fb120_b1.SCF	Ga_group_01	86.49	37	5	0	2	38	5229998	5229962	0.013	44			breambac-108b15	2	same	49824	-1	+
breambac-112m12.f	Ga_group_01	82.29	96	16	1	335	429	5.24479e+06	5.24471e+06	3e-16	90.3			breambac-112m12	2	same	1.42116e+07	-1	-
breambac-105p7.r	Ga_group_01	78.98	709	115	8	6	691	5.25158e+06	5.25343e+06	2e-150	535			breambac-105p7	2	same	32700.5	1	-
breambac-54n7.f	Ga_group_01	82.28	508	76	4	1	497	5251590	5.2512e+06	5e-130	467			breambac-54n7	2	same	41557	-1	+	Contig End	breambac-54n7.f
breambac-91i7.f	Ga_group_01	85.71	280	38	2	1	280	5.25161e+06	5.25182e+06	3e-79	299			breambac-91i7	2	same	50035.7	1	+	Contig Start	breambac-91i7.f
breambac-132f7.r	Ga_group_01	85.71	252	34	2	2	253	5.25163e+06	5.25182e+06	9e-70	267			breambac-132f7	2	same	36021.7	1	+
breambac-132f7.f	Ga_group_01	76.85	501	99	7	2	494	5.28765e+06	5287237	3e-93	345			breambac-132f7	2	same	36021.7	-1	+
breambac-91i7.r	Ga_group_01	71.7	371	82	7	366	714	5.30164e+06	5.30136e+06	1e-38	164			breambac-91i7	2	same	50035.7	-1	+	Contig End	breambac-91i7.r
breambac-72m5.f	Ga_group_01	83.94	249	37	3	260	508	5.3397e+06	5.33989e+06	1e-61	240			breambac-72m5	2	same	82146.1	1	+	Contig Start	breambac-72m5.f
breambac-37g17.f	Ga_group_01	82.2	236	40	2	65	298	5.34105e+06	5.34123e+06	2e-56	223			breambac-37g17	2	same	53162.5	1	+
breambac-122n24.f	Ga_group_01	82.2	236	40	2	65	298	5.34105e+06	5.34123e+06	2e-56	223			breambac-122n24	2	same	73875.8	1	+
breambac-21p17.f	Ga_group_01	79.72	143	24	2	499	641	5.37924e+06	5.37935e+06	1e-21	107			breambac-21p17	2	same	8.72968e+06	1	+
breambac-37g17.r	Ga_group_01	87.5	112	14	0	1	112	5.39422e+06	5.39417e+06	1e-29	134			breambac-37g17	2	same	53162.5	-1	+
breambac-136c3.f	Ga_group_01	86.19	420	45	3	33	444	5.39432e+06	5.39466e+06	3e-111	405			breambac-136c3	2	same	63345.2	1	+
breambac-110j23.r	Ga_group_01	87.63	372	41	2	17	388	5.39432e+06	5.39462e+06	9e-106	386			breambac-110j23	2	same	91645.2	1	+
breambac-122n24.r	Ga_group_01	87.46	327	25	6	3	328	5.41493e+06	5.41465e+06	3e-81	305			breambac-122n24	2	same	73875.8	-1	+
breambac-41o13.f	Ga_group_01	89.15	341	29	2	1	333	5.41956e+06	5.41993e+06	6e-109	397			breambac-41o13	2	same	82043.3	1	+	MAX	breambac-41o13.f
breambac-72m5.r	Ga_group_01	69.89	186	51	2	612	792	5.42185e+06	5.4217e+06	1e-17	95.1			breambac-72m5	2	same	82146.1	-1	+		breambac-72m5.r
breambac-76j7.r	Ga_group_01	84.34	613	80	4	1	613	5.42215e+06	5.42265e+06	0	668			breambac-76j7	2	same	88959.5	1	+
breambac-110g19.r	Ga_group_01	85.34	348	42	4	2	349	5.44428e+06	5.44462e+06	2e-93	345			breambac-110g19	2	same	90483.4	1	+
breambac-26m1.r	Ga_group_01	86.22	341	37	5	1	340	5.44429e+06	5.44462e+06	6e-91	337			breambac-26m1	2	same	100937	1	+	MAX	breambac-26m1.r
breambac-136c3.r	Ga_group_01	84.08	289	35	1	561	838	5.45767e+06	5.45745e+06	7e-76	288			breambac-136c3	2	same	63345.2	-1	+
breambac-110j23.f	Ga_group_01	89.39	179	18	1	61	238	5.48597e+06	5.4858e+06	5e-54	215			breambac-110j23	2	same	91645.2	-1	+
breambac-41o13.r	Ga_group_01	83.64	55	9	0	397	451	5.5016e+06	5.50156e+06	2e-07	60.2			breambac-41o13	2	same	82043.3	-1	+		breambac-41o13.r
breambac-76j7.f	Ga_group_01	77.92	308	67	1	369	676	5.51111e+06	5.51084e+06	7e-68	261			breambac-76j7	2	same	88959.5	-1	+
breambac-61j18.f	Ga_group_01	77.07	484	60	8	1	452	5.52296e+06	5.52332e+06	3e-71	272			breambac-61j18	2	same	67050.5	1	+
breambac-110g19.f	Ga_group_01	75.16	306	60	3	1	306	5.53477e+06	5.53452e+06	3e-48	196			breambac-110g19	2	same	90483.4	-1	+
breambac-139b5.r	Ga_group_01	82.89	187	32	0	356	542	5.5352e+06	5535374	3e-48	196			breambac-139b5	2	same	57087	1	+	MAX	breambac-139b5.r
breambac-26m1.f	Ga_group_01	77.68	448	97	3	4	449	5.54522e+06	5.54474e+06	2e-99	366			breambac-26m1	2	same	100937	-1	+		breambac-26m1.f
breambac-32c9.r	Ga_group_01	96.7	182	6	0	538	719	5.57645e+06	5.57667e+06	1e-70	271			breambac-32c9	2	same	89369.5	1	+
breambac-123d16.r	Ga_group_01	77.54	748	143	10	1	730	5.58169e+06	5582379	9e-153	543			breambac-123d16	2	same	65823.5	1	+
breambac-75j7.f	Ga_group_01	82.42	165	25	1	303	463	5.58978e+06	5.58888e+06	2e-36	156			breambac-75j7	2	same	61448.3	-1	-
breambac-61j18.r	Ga_group_01	85.71	42	6	0	5	46	5.59002e+06	5.58998e+06	0.0003	49.1			breambac-61j18	2	same	67050.5	-1	+
breambac-14b23.r	Ga_group_01	88.54	96	11	0	377	472	5.59161e+06	5.59168e+06	4e-25	118			breambac-14b23	2	same	74211.4	1	+
breambac-30n1.r	Ga_group_01	85.83	254	35	1	390	643	5.59161e+06	5591839	2e-73	280			breambac-30n1	2	same	74211.4	1	+	MAX	breambac-30n1.r
breambac-139b5.f	Ga_group_01	83.56	219	22	3	594	800	5.59229e+06	5.59209e+06	5e-43	179			breambac-139b5	2	same	57087	-1	+		breambac-139b5.f
breambac-129b12.r	Ga_group_01	79.85	526	84	4	226	737	5.5925e+06	5.59289e+06	6e-118	427			breambac-129b12	2	same	55017.2	1	+
breambac-144j3.r	Ga_group_01	81.17	462	69	2	233	684	5.5925e+06	5.59285e+06	1e-111	407			breambac-144j3	2	same	55017.2	1	+
breambac-79e20.r	Ga_group_01	80.26	542	85	4	82	609	5.5925e+06	5.59291e+06	3e-124	448			breambac-79e20	2	same	56628.8	1	+
breambac-15p19.f	Ga_group_01	91.36	81	7	0	264	344	5.5925e+06	5.59256e+06	6e-22	107			breambac-15p19	2	same	73325.3	1	+
breambac-114k7.f	Ga_group_01	78.86	402	67	2	259	650	5.5925e+06	5.5928e+06	5e-86	321			breambac-114k7	2	same	88930.8	1	+	MAX	breambac-114k7.f
breambac-115g12.f	Ga_group_01	84.15	328	40	3	91	408	5.59604e+06	5.59633e+06	1e-83	313			breambac-115g12	2	same	78957.4	1	+
breambac-129b12.f	Ga_group_01	76.57	367	65	8	62	421	5.64751e+06	5.64724e+06	9e-54	213			breambac-129b12	2	same	55017.2	-1	+
breambac-144j3.f	Ga_group_01	78.42	482	79	9	240	717	5.64751e+06	5647160	1e-83	313			breambac-144j3	2	same	55017.2	-1	+
breambac-123d16.f	Ga_group_01	77.14	398	69	7	240	633	5.64751e+06	5.64722e+06	1e-64	250			breambac-123d16	2	same	65823.5	-1	+
breambac-79e20.f	Ga_group_01	80	165	28	1	230	394	5.64913e+06	5.649e+06	4e-32	142			breambac-79e20	2	same	56628.8	-1	+
breambac-75j7.r	Ga_group_01	80.18	222	42	2	466	686	5.65033e+06	5.65016e+06	8e-48	194			breambac-75j7	2	same	61448.3	-1	-
breambac-101l19.r	Ga_group_01	87.47	407	36	2	323	721	5.65174e+06	5.65205e+06	8e-121	437			breambac-101l19	2	same	1.526e+06	1	-
breambac-60c6.f	Ga_group_01	81.36	59	11	0	192	250	5.65522e+06	5.65526e+06	3e-07	60.2			breambac-60c6	2	same	3500	1	+
breambac-60c6.r	Ga_group_01	82.52	349	48	3	1	337	5.65872e+06	5.65845e+06	1e-84	316			breambac-60c6	2	same	3500	-1	+
breambac-15p19.r	Ga_group_01	80.77	208	37	2	253	457	5.66582e+06	5.66566e+06	2e-44	183			breambac-15p19	2	same	73325.3	-1	+
breambac-14b23.f	Ga_group_01	79.33	208	40	2	278	482	5.66582e+06	5.66566e+06	8e-42	174			breambac-14b23	2	same	74211.4	-1	+
breambac-30n1.f	Ga_group_01	80.77	208	37	2	278	482	5.66582e+06	5.66566e+06	2e-44	183			breambac-30n1	2	same	74211.4	-1	+		breambac-30n1.f
breambac-32c9.f	Ga_group_01	80.77	208	37	2	275	479	5.66582e+06	5.66566e+06	2e-44	183			breambac-32c9	2	same	89369.5	-1	+
breambac-50p14.r	Ga_group_01	89.69	543	49	6	130	665	5.67202e+06	5.67248e+06	1e-177	626			breambac-50p14	2	same	59643.4	1	+	MAX	breambac-50p14.r
breambac-115g12.r	Ga_group_01	89.94	467	39	5	246	706	5.675e+06	5.67443e+06	8e-152	540			breambac-115g12	2	same	78957.4	-1	+
breambac-114k7.r	Ga_group_01	84.5	342	50	2	355	693	5.68143e+06	5.68112e+06	2e-96	356			breambac-114k7	2	same	88930.8	-1	+		breambac-114k7.r
breambac-79p16.r	Ga_group_01	84.21	171	27	0	594	764	5.68617e+06	5.68604e+06	2e-45	187			breambac-79p16	2	same	4.46042e+06	-1	-
breambac-126n7.r	Ga_group_01	86.35	249	33	1	473	721	5.70151e+06	5.7017e+06	4e-73	278			breambac-126n7	2	same	58569.8	1	+	MAX	breambac-126n7.r
breambac-50p14.f	Ga_group_01	93.61	657	31	7	1	647	5.73166e+06	5.73102e+06	0	778			breambac-50p14	2	same	59643.4	-1	+		breambac-50p14.f
breambac-126n7.f	Ga_group_01	88.3	171	20	0	55	225	5.76008e+06	5.75995e+06	2e-52	209			breambac-126n7	2	same	58569.8	-1	+	Contig End	breambac-126n7.f
breambac-127a10.r	Ga_group_01	85.41	569	81	2	145	711	5864817	5.86541e+06	4e-176	621			breambac-127a10	2	same	79544.2	1	+	Contig Start	breambac-127a10.r
breambac-17a15.f	Ga_group_01	86.28	576	78	1	155	729	5864817	5.86542e+06	0	654			breambac-17a15	2	same	86738.3	1	+	MAX	breambac-17a15.f
breambac-133p16.r	Ga_group_01	85.29	170	21	2	329	498	5.8767e+06	5.87683e+06	3e-40	169			breambac-133p16	2	same	67656.8	1	+
breambac-127g2.f	Ga_group_01	74.14	58	15	0	467	524	5.88177e+06	5.88173e+06	0.006	46			breambac-127g2	2	same	1.65752e+07	-1	-
breambac-133p16.f	Ga_group_01	83.57	213	35	0	1	213	5.94436e+06	5.94415e+06	8e-58	228			breambac-133p16	2	same	67656.8	-1	+
breambac-127a10.f	Ga_group_01	83.57	213	35	0	1	213	5.94436e+06	5.94415e+06	8e-58	228			breambac-127a10	2	same	79544.2	-1	+		breambac-127a10.f
breambac-17a15.r	Ga_group_01	84.88	172	25	1	45	215	5.95156e+06	5.9514e+06	4e-44	182			breambac-17a15	2	same	86738.3	-1	+	Contig End	breambac-17a15.r
breambac-142m9.f	Ga_group_01	91.79	329	25	2	1	329	5.98629e+06	5.98662e+06	3e-112	408			breambac-142m9	2	same	73608.4	1	+	Contig Start	breambac-142m9.f
breambac-55a9.f	Ga_group_01	90.16	254	25	0	513	766	6008783	6009036	6e-67	258			breambac-55a9	2	same	68020	1	+
breambac-13m20.f	Ga_group_01	85.35	314	38	5	286	593	6.01572e+06	6.01603e+06	2e-80	302			breambac-13m20	2	same	61568.2	1	+
breambac-63c7.r	Ga_group_01	81.63	147	20	3	529	674	6.05966e+06	6.05976e+06	2e-23	114			breambac-63c7	2	same	61072.8	1	+
breambac-42l12.r	Ga_group_01	80.99	121	17	2	545	665	6.05966e+06	6.05974e+06	8e-18	95.1			breambac-42l12	2	same	67778.1	1	+	MAX	breambac-42l12.r
breambac-142m9.r	Ga_group_01	82.05	351	45	2	13	363	6.0599e+06	6.05964e+06	3e-80	302			breambac-142m9	2	same	73608.4	-1	+		breambac-142m9.r
breambac-55a9.r	Ga_group_01	86.47	170	16	3	556	722	6076803	6076638	2e-38	163			breambac-55a9	2	same	68020	-1	+
breambac-13m20.r	Ga_group_01	74.29	280	47	5	2	274	6077288	6.077e+06	1e-30	137			breambac-13m20	2	same	61568.2	-1	+
breambac-10k13.r	Ga_group_01	73.24	142	38	0	88	229	6.10344e+06	6.10355e+06	2e-21	106			breambac-10k13	2	same	877739	1	-
breambac-63c7.f	Ga_group_01	74.89	219	49	3	227	440	6.12073e+06	6.12056e+06	1e-31	141			breambac-63c7	2	same	61072.8	-1	+
breambac-10e10.f	Ga_group_01	89.41	85	9	0	611	695	6.1214e+06	6.12146e+06	5e-22	109			breambac-10e10	2	same	70494.2	1	+	MAX	breambac-10e10.f
breambac-42l12.f	Ga_group_01	80.05	366	63	4	6	361	6.12743e+06	6.12706e+06	8e-80	301			breambac-42l12	2	same	67778.1	-1	+		breambac-42l12.f
breambac-36o7.r	Ga_group_01	74.49	247	61	2	3	247	6.12748e+06	6.1277e+06	4e-42	175			breambac-36o7	2	same	64411.2	1	+
breambac-28f17.f	Ga_group_01	75.38	524	89	8	7	501	6.14851e+06	6.1489e+06	5e-76	288			breambac-28f17	2	same	78756.6	1	+	MAX	breambac-28f17.f
breambac-138n21.r	Ga_group_01	80.3	203	38	2	528	728	6.14968e+06	6149835	5e-43	179			breambac-138n21	2	same	62492.6	1	+
breambac-36o7.f	Ga_group_01	79.92	239	35	3	209	447	6.19189e+06	6.19172e+06	2e-44	183			breambac-36o7	2	same	64411.2	-1	+
breambac-10e10.r	Ga_group_01	79.92	239	35	3	188	426	6.19189e+06	6.19172e+06	2e-44	183			breambac-10e10	2	same	70494.2	-1	+		breambac-10e10.r
breambac-138n21.f	Ga_group_01	81.94	144	19	3	1	137	6.21217e+06	6.21206e+06	5e-23	112			breambac-138n21	2	same	62492.6	-1	+
breambac-28f17.r	Ga_group_01	77.45	337	60	8	140	470	6.22726e+06	6.22701e+06	3e-51	206			breambac-28f17	2	same	78756.6	-1	+	Contig End	breambac-28f17.r
breambac-78o10.r	Ga_group_01	82.23	619	84	11	102	701	6.22938e+06	6.22997e+06	2e-141	505			breambac-78o10	2	same	56429.2	1	+	Contig Start	breambac-78o10.r
breambac-90e20.f	Ga_group_01	80.84	689	107	11	130	801	6.22938e+06	6.23002e+06	4e-154	548			breambac-90e20	2	same	83152.9	1	+
breambac-49p8.r	Ga_group_01	77.17	219	44	1	65	283	6261558	6261770	3e-41	172			breambac-49p8	2	same	59733	1	+	MAX	breambac-49p8.r
breambac-78o10.f	Ga_group_01	82.95	129	14	2	54	182	6.28581e+06	6.28572e+06	3e-20	103			breambac-78o10	2	same	56429.2	-1	+		breambac-78o10.f
breambac-26p4.r	Ga_group_01	69.7	231	70	0	155	385	6286343	6286573	5e-40	168			breambac-26p4	2	same	71395	1	+	MAX	breambac-26p4.r
breambac-90e20.r	Ga_group_01	79.67	123	21	2	335	453	6.31254e+06	6.31244e+06	1e-17	95.1			breambac-90e20	2	same	83152.9	-1	+
breambac-49p8.f	Ga_group_01	83.54	79	13	0	1	79	6321291	6321213	3e-08	63.4			breambac-49p8	2	same	59733	-1	+		breambac-49p8.f
breambac-144o14.f	Ga_group_01	90.52	232	16	1	397	628	6.32403e+06	6.3242e+06	4e-74	282			breambac-144o14	2	same	120908	1	+	MAX	breambac-144o14.f
breambac-42n12.f	Ga_group_01	76.33	283	56	4	177	451	6.34359e+06	6.34381e+06	2e-44	183			breambac-42n12	2	same	54148.2	1	+
breambac-53m11.r	Ga_group_01	90.34	176	17	0	518	693	6.35191e+06	6.35205e+06	7e-58	228			breambac-53m11	2	same	67868.4	1	+
breambac-67d22.r	Ga_group_01	85.34	232	31	3	293	523	6.35759e+06	6.35776e+06	2e-57	226			breambac-67d22	2	same	73529.1	1	+
breambac-26p4.f	Ga_group_01	86.72	369	49	0	197	565	6357738	6357370	2e-103	378			breambac-26p4	2	same	71395	-1	+		breambac-26p4.f
breambac-58c14.r	Ga_group_01	82.12	179	31	1	1	179	6.37094e+06	6.37088e+06	8e-42	174			breambac-58c14	2	same	52195.8	-1	-
breambac-4b16.f	Ga_group_01	81.56	244	40	5	210	450	6.37145e+06	6.37163e+06	2e-47	193			breambac-4b16	2	same	51629.1	1	+
breambac-137h4.f	Ga_group_01	82.97	505	76	7	3	501	6.39733e+06	6.39774e+06	1e-124	450			breambac-137h4	2	same	47608	1	+
breambac-105d3.f	Ga_group_01	82.97	505	76	7	3	501	6.39733e+06	6.39774e+06	1e-124	450			breambac-105d3	2	same	76283.7	1	+
breambac-42n12.r	Ga_group_01	84.01	444	64	5	233	671	6.39774e+06	6.39737e+06	5e-116	421			breambac-42n12	2	same	54148.2	-1	+
breambac-44p3.r	Ga_group_01	86.63	344	38	6	2	339	6.41497e+06	6.41466e+06	2e-88	329			breambac-44p3	2	same	4.91345e+06	-1	-
breambac-53m11.f	Ga_group_01	82.8	314	45	3	384	694	6.41978e+06	6.41954e+06	5e-76	288			breambac-53m11	2	same	67868.4	-1	+
breambac-4b16.r	Ga_group_01	89.47	114	12	0	462	575	6.42308e+06	6.42299e+06	4e-33	145			breambac-4b16	2	same	51629.1	-1	+
breambac-58c14.f	Ga_group_01	89.08	119	12	1	484	602	6.42308e+06	6.42299e+06	3e-31	139			breambac-58c14	2	same	52195.8	-1	-
breambac-67d22.f	Ga_group_01	75.43	411	74	7	2	390	6.43111e+06	6.4308e+06	5e-60	234			breambac-67d22	2	same	73529.1	-1	+
breambac-95j8.r	Ga_group_01	84.72	144	21	1	479	621	6.44168e+06	6.44179e+06	2e-34	150			breambac-95j8	2	same	54686.4	1	+	MAX	breambac-95j8.r
breambac-137h4.r	Ga_group_01	92.86	70	5	0	39	108	6.44493e+06	6444880	3e-18	96.7			breambac-137h4	2	same	47608	-1	+
breambac-144o14.r	Ga_group_01	90.14	71	7	0	17	87	6.44494e+06	6.44488e+06	8e-17	91.9			breambac-144o14	2	same	120908	-1	+		breambac-144o14.r
breambac-126b16.f	Ga_group_01	89.53	172	18	0	412	583	6.45953e+06	6.45969e+06	2e-54	217			breambac-126b16	2	same	55357.6	1	+
breambac-105d3.r	Ga_group_01	66.53	242	68	4	123	360	6.47361e+06	6.47343e+06	1e-14	84			breambac-105d3	2	same	76283.7	-1	+
breambac-77c4.r	Ga_group_01	79.42	481	94	3	1	480	6.47591e+06	6.4763e+06	4e-115	418			breambac-77c4	2	same	2437.54	1	+
breambac-77c4.f	Ga_group_01	77.4	469	81	5	20	467	6.47834e+06	6.47799e+06	5e-79	297			breambac-77c4	2	same	2437.54	-1	+
breambac-61l21.r	Ga_group_01	70.62	177	51	1	43	218	6481368	6481544	5e-22	107			breambac-61l21	2	same	56773	1	+
breambac-108c22.r	Ga_group_01	74.43	219	41	3	340	546	6481613	6481828	2e-26	123			breambac-108c22	2	same	56528	1	+	MAX	breambac-108c22.r
breambac-95j8.f	Ga_group_01	77.87	235	40	2	20	252	6.49637e+06	6.4962e+06	2e-37	160			breambac-95j8	2	same	54686.4	-1	+		breambac-95j8.f
breambac-40n7.r	Ga_group_01	90.52	116	11	0	98	213	6510617	6.51053e+06	1e-34	150	4		breambac-40n7	2	same	6.22161e+06	-1	-
breambac-52g11.r	Ga_group_01	88.79	116	13	0	43	158	6510617	6.51053e+06	7e-33	144	4		breambac-52g11	2	same	6.23649e+06	-1	-
breambac-10c22.f	Ga_group_01	90.52	116	11	0	98	213	6510617	6.51053e+06	1e-34	150	4		breambac-10c22	2	same	6.25631e+06	-1	-
breambac-126b16.r	Ga_group_01	80.49	364	60	2	55	407	6.51489e+06	6.51461e+06	2e-85	320			breambac-126b16	2	same	55357.6	-1	+
breambac-60f24.f	Ga_group_01	86.28	277	36	2	160	436	6.51948e+06	6519722	3e-80	302			breambac-60f24	2	same	54879.1	1	+	MAX	breambac-60f24.f
breambac-7b4.f	Ga_group_01	68.02	172	53	2	12	182	6520812	6.52094e+06	2e-13	80.8			breambac-7b4	2	same	1.96717e+06	1	-
breambac-108c22.f	Ga_group_01	68.22	107	34	0	263	369	6538141	6538035	3e-08	63.4			breambac-108c22	2	same	56528	-1	+		breambac-108c22.f
breambac-61l21.f	Ga_group_01	68.22	107	34	0	263	369	6538141	6538035	2e-08	63.4			breambac-61l21	2	same	56773	-1	+
breambac-52h6.f	Ga_group_01	79.1	488	82	6	265	734	6.56918e+06	6.56955e+06	1e-93	347			breambac-52h6	2	same	63892	1	+	MAX	breambac-52h6.f
breambac-10l22.f	Ga_group_01	85.09	114	17	0	84	197	6.57121e+06	6.57129e+06	6e-28	128			breambac-10l22	2	same	58040.2	1	+
breambac-60f24.r	Ga_group_01	75.9	361	81	4	60	414	6.57436e+06	6.57409e+06	5e-55	218			breambac-60f24	2	same	54879.1	-1	+		breambac-60f24.r
breambac-137c5.r	Ga_group_01	84.62	52	8	0	759	810	6.59039e+06	6.59043e+06	1e-06	58.6			breambac-137c5	2	same	42713.2	1	+
breambac-128i24.f	Ga_group_01	75.34	219	50	2	521	738	6.59199e+06	6.59215e+06	7e-36	155			breambac-128i24	2	same	41095.6	1	+
breambac-83l8.f	Ga_group_01	69.37	333	91	2	182	513	6.60291e+06	6.60316e+06	2e-34	150			breambac-83l8	2	same	56387.8	1	+	MAX	breambac-83l8.f
breambac-10l22.r	Ga_group_01	90.09	111	11	0	354	464	6.62925e+06	6.62914e+06	7e-20	101			breambac-10l22	2	same	58040.2	-1	+
breambac-52h6.r	Ga_group_01	73.88	601	119	12	1	577	6.63307e+06	6.63262e+06	5e-75	285			breambac-52h6	2	same	63892	-1	+		breambac-52h6.r
breambac-128i24.r	Ga_group_01	74.23	617	120	13	4	595	6.63308e+06	6.63262e+06	7e-78	294			breambac-128i24	2	same	41095.6	-1	+
breambac-137c5.f	Ga_group_01	74.53	644	126	12	10	629	6.6331e+06	6.63262e+06	8e-89	331			breambac-137c5	2	same	42713.2	-1	+
breambac-57d14.f	Ga_group_01	85.53	159	18	1	203	356	6.64911e+06	6.64923e+06	6e-39	164			breambac-57d14	2	same	65257.1	1	+	MAX	breambac-57d14.f
breambac-83l8.r	Ga_group_01	76.52	132	26	2	3	129	6.6593e+06	6.65919e+06	8e-16	88.8			breambac-83l8	2	same	56387.8	-1	+		breambac-83l8.r
breambac-131p22.f	Ga_group_01	77.59	232	50	2	1	230	6659302	6659533	4e-45	185			breambac-131p22	2	same	61117	1	+
breambac-119i10.r	Ga_group_01	89.32	309	27	2	6	309	6.65935e+06	6.65962e+06	6e-98	361			breambac-119i10	2	same	79085.3	1	+
breambac-12j17.r	Ga_group_01	88.1	84	10	0	595	678	6683330	6683413	3e-20	103			breambac-12j17	2	same	55017	1	+
breambac-137b13.f	Ga_group_01	86.69	323	36	3	1	317	6.71003e+06	6.71028e+06	1e-82	310			breambac-137b13	2	same	51967.7	1	+	MAX	breambac-137b13.f
breambac-57d14.r	Ga_group_01	80.29	137	21	2	66	196	6.71437e+06	6.71426e+06	7e-22	107			breambac-57d14	2	same	65257.1	-1	+		breambac-57d14.r
breambac-23m9.f	Ga_group_01	92.16	51	4	0	336	386	6.71875e+06	6.71872e+06	2e-10	69.7	5		breambac-23m9	2	same	1.19805e+07	-1	-
breambac-131p22.r	Ga_group_01	85.59	118	16	1	96	213	6720419	6720303	6e-27	125			breambac-131p22	2	same	61117	-1	+
breambac-12j17.f	Ga_group_01	76.92	65	15	0	441	505	6738347	6738283	2e-06	57.1			breambac-12j17	2	same	55017	-1	+
breambac-119i10.f	Ga_group_01	78.15	238	37	4	39	273	6.73844e+06	6.73826e+06	7e-37	158			breambac-119i10	2	same	79085.3	-1	+
breambac-126a21.f	Ga_group_01	91.73	508	30	2	223	720	6.75359e+06	6.7541e+06	0	638			breambac-126a21	2	same	59647.8	1	+	MAX	breambac-126a21.f
breambac-137b13.r	Ga_group_01	91.44	187	15	1	224	410	6.762e+06	6.76186e+06	1e-60	237			breambac-137b13	2	same	51967.7	-1	+		breambac-137b13.r
breambac-135h4.f	Ga_group_01	91.02	167	15	0	465	631	6.77587e+06	6.77604e+06	2e-55	220			breambac-135h4	2	same	64936.2	1	+
breambac-110m6.r	Ga_group_01	75.21	242	53	3	368	609	6799455	6799689	3e-32	142			breambac-110m6	2	same	105653	1	+	MAX	breambac-110m6.r
breambac-99i1.r	Ga_group_01	82.27	141	22	2	371	508	6.81075e+06	6810645	8e-27	125	5		breambac-99i1	2	same	1.19187e+07	-1	-
breambac-126a21.r	Ga_group_01	70.16	248	70	4	323	566	6.81324e+06	6.81305e+06	7e-26	122			breambac-126a21	2	same	59647.8	-1	+		breambac-126a21.r
breambac-49i13.f	Ga_group_01	77.89	407	82	4	350	749	6.81558e+06	6.81589e+06	2e-84	316			breambac-49i13	2	same	83110.7	1	+
breambac-54h22.f	Ga_group_01	77.95	381	76	4	344	717	6.81558e+06	6.81587e+06	7e-78	294			breambac-54h22	2	same	83110.7	1	+
breambac-54a18.f	Ga_group_01	80.56	108	16	1	3	110	6.83499e+06	6.83507e+06	2e-15	87.2			breambac-54a18	2	same	92970.7	1	+
breambac-135h4.r	Ga_group_01	82.15	521	81	4	5	524	6.84081e+06	6.84035e+06	3e-134	481			breambac-135h4	2	same	64936.2	-1	+
breambac-45m18.f	Ga_group_01	78.52	270	46	4	250	515	6.85114e+06	6.85136e+06	8e-48	194			breambac-45m18	2	same	64436.3	1	+
breambac-103n23.r	Ga_group_01	78.52	270	46	4	119	384	6.85114e+06	6.85136e+06	6e-48	194			breambac-103n23	2	same	76821.9	1	+
breambac-107e7.f	Ga_group_01	76	150	31	2	375	524	6.87806e+06	6.87817e+06	3e-19	99.9			breambac-107e7	2	same	75350.3	1	+
breambac-46d10.f	Ga_group_01	69.27	524	124	9	180	697	6.89714e+06	6.89753e+06	4e-62	242			breambac-46d10	2	same	109871	1	+	MAX	breambac-46d10.f
breambac-49i13.r	Ga_group_01	81.12	625	105	8	11	632	6898686	6.89816e+06	1e-146	523			breambac-49i13	2	same	83110.7	-1	+
breambac-54h22.r	Ga_group_01	81.92	625	100	8	41	662	6898686	6.89816e+06	2e-151	538			breambac-54h22	2	same	83110.7	-1	+
breambac-110m6.f	Ga_group_01	79.79	193	39	0	81	273	6905108	6904916	2e-44	183			breambac-110m6	2	same	105653	-1	+		breambac-110m6.f
breambac-124j22.f	Ga_group_01	84.4	391	41	3	31	415	6.90521e+06	6.9055e+06	1e-71	274			breambac-124j22	2	same	76981.5	1	+
breambac-45m18.r	Ga_group_01	71.96	189	42	4	424	608	6.91558e+06	6.91544e+06	6e-13	79.2			breambac-45m18	2	same	64436.3	-1	+
breambac-103n23.f	Ga_group_01	81.88	160	21	3	284	443	6.92796e+06	6.92785e+06	2e-27	126			breambac-103n23	2	same	76821.9	-1	+
breambac-54a18.r	Ga_group_01	81.88	160	21	3	273	432	6.92796e+06	6.92785e+06	2e-27	126			breambac-54a18	2	same	92970.7	-1	+
breambac-107e7.r	Ga_group_01	82.03	128	22	1	540	666	6.95341e+06	6.95331e+06	7e-26	122			breambac-107e7	2	same	75350.3	-1	+
breambac-129c8.r	Ga_group_01	86.12	317	40	2	122	435	6.95523e+06	6.95551e+06	4e-92	342			breambac-129c8	2	same	80563.4	1	+
breambac-120i10.r	Ga_group_01	86.03	315	40	2	126	437	6.95523e+06	6.95551e+06	3e-91	339			breambac-120i10	2	same	63181.8	1	+
breambac-96k9.r	Ga_group_01	91.49	235	20	0	220	454	6.96768e+06	6.9679e+06	1e-82	310			breambac-96k9	2	same	62958.6	1	+
breambac-10k13.f	Ga_group_01	82.07	474	73	2	34	501	6.98072e+06	6.98118e+06	2e-124	448			breambac-10k13	2	same	877739	1	-
breambac-124j22.r	Ga_group_01	84.82	764	114	2	2	763	6.98219e+06	6.98147e+06	0	825			breambac-124j22	2	same	76981.5	-1	+
breambac-23h4.f	Ga_group_01	78.02	373	65	4	3	358	6.98223e+06	6.98252e+06	8e-72	274			breambac-23h4	2	same	64966.2	1	+	MAX	breambac-23h4.f
breambac-46d10.r	Ga_group_01	70.89	292	67	5	263	552	7.00701e+06	7.0068e+06	3e-27	126			breambac-46d10	2	same	109871	-1	+		breambac-46d10.r
breambac-120i10.f	Ga_group_01	80.41	194	30	4	436	625	7.01841e+06	7.01827e+06	1e-32	144			breambac-120i10	2	same	63181.8	-1	+
breambac-96k9.f	Ga_group_01	84.8	204	31	0	231	434	7.03063e+06	7.03044e+06	2e-57	226			breambac-96k9	2	same	62958.6	-1	+
breambac-129c8.f	Ga_group_01	84.1	195	24	3	203	391	7.03579e+06	7.03563e+06	7e-43	177			breambac-129c8	2	same	80563.4	-1	+
breambac-23h4.r	Ga_group_01	85.37	123	18	0	24	146	7.0472e+06	7047103	2e-31	139			breambac-23h4	2	same	64966.2	-1	+	Contig End	breambac-23h4.r
breambac-23b8.f	Ga_group_01	78.46	130	27	1	148	277	7.04754e+06	7.04764e+06	4e-22	109			breambac-23b8	2	same	53512.3	1	+	Contig Start	breambac-23b8.f
breambac-33a12.f	Ga_group_01	76.07	117	27	1	352	467	7.06943e+06	7069522	8e-16	88.8			breambac-33a12	2	same	55860.3	1	+
breambac-19i2.r	Ga_group_01	83.76	271	25	6	433	703	7.08582e+06	7.08608e+06	3e-48	196			breambac-19i2	2	same	77422.9	1	+	MAX	breambac-19i2.r
breambac-23b8.r	Ga_group_01	79.62	314	46	5	265	578	7.10105e+06	7.10082e+06	9e-50	201			breambac-23b8	2	same	53512.3	-1	+		breambac-23b8.r
breambac-33a12.r	Ga_group_01	75.16	153	31	3	122	269	7.12529e+06	7.12518e+06	7e-16	88.8			breambac-33a12	2	same	55860.3	-1	+
breambac-106l13.f	Ga_group_01	79.3	372	67	3	86	450	7.1393e+06	7139580	9e-82	307			breambac-106l13	2	same	65477.1	1	+
breambac-14g6.r	Ga_group_01	76.59	205	40	3	86	286	7.14531e+06	7.14515e+06	6e-31	137			breambac-14g6	2	same	1.57998e+07	-1	-
breambac-111p6.r	Ga_group_01	79	100	21	0	328	427	7.1486e+06	7.14867e+06	2e-17	93.5			breambac-111p6	2	same	54036.4	1	+
breambac-139a1.f	Ga_group_01	78.33	360	58	4	363	708	7.15034e+06	7.15395e+06	8e-68	261			breambac-139a1	2	same	62642.2	1	+	MAX	breambac-139a1.f
breambac-19i2.f	Ga_group_01	82.92	404	52	3	4	390	7.16325e+06	7.1629e+06	3e-101	372			breambac-19i2	2	same	77422.9	-1	+		breambac-19i2.f
breambac-101l19.f	Ga_group_01	70.35	199	58	1	1	198	7.1776e+06	7.17775e+06	2e-25	120			breambac-101l19	2	same	1.526e+06	1	-
breambac-111p6.f	Ga_group_01	80.54	298	52	3	144	441	7.20263e+06	7.20241e+06	5e-66	255			breambac-111p6	2	same	54036.4	-1	+
breambac-26l7.f	Ga_group_01	76	125	30	0	44	168	7.20374e+06	7.20384e+06	1e-20	104			breambac-26l7	2	same	77958.8	1	+	MAX	breambac-26l7.f
breambac-106l13.r	Ga_group_01	87.78	90	11	0	1	90	7204774	7.20471e+06	5e-22	109			breambac-106l13	2	same	65477.1	-1	+
breambac-139a1.r	Ga_group_01	46.07	356	192	0	200	555	7.21298e+06	7.21271e+06	4e-13	79.2			breambac-139a1	2	same	62642.2	-1	+		breambac-139a1.r
breambac-126g7.r	Ga_group_01	81.3	385	50	7	341	713	7.21386e+06	7.21417e+06	4e-73	278			breambac-126g7	2	same	766187	1	+
breambac-99k3.f	Ga_group_01	69.14	431	101	9	204	611	7.21791e+06	7.21823e+06	1e-31	141			breambac-99k3	2	same	44022.4	1	+
breambac-41e3.r	Ga_group_01	79.52	459	78	7	70	527	7.22005e+06	7.22043e+06	1e-94	350			breambac-41e3	2	same	51690.1	1	+
breambac-13n9.f	Ga_group_01	79.3	459	79	7	93	550	7.22005e+06	7.22043e+06	1e-93	347			breambac-13n9	2	same	55125.8	1	+
breambac-115m2.f	Ga_group_01	78.92	370	69	6	1	369	7.22011e+06	7.22043e+06	4e-73	278			breambac-115m2	2	same	55062.7	1	+
breambac-109l4.f	Ga_group_01	79.19	370	68	6	1	369	7.22011e+06	7.22043e+06	5e-74	282			breambac-109l4	2	same	55737.8	1	+
breambac-54h8.r	Ga_group_01	77.85	325	63	6	19	342	7.22014e+06	7.22043e+06	1e-57	226			breambac-54h8	2	same	61612.5	1	+
breambac-129n8.r	Ga_group_01	72.57	175	37	2	68	232	7.23231e+06	7.23244e+06	3e-17	93.5			breambac-129n8	2	same	49109.1	1	+
breambac-120l24.f	Ga_group_01	80	380	66	4	37	415	7.24991e+06	7.2502e+06	7e-84	313			breambac-120l24	2	same	41708.5	1	+
breambac-120n18.f	Ga_group_01	78.41	565	102	8	113	672	7.24991e+06	7.25034e+06	4e-114	415			breambac-120n18	2	same	41708.5	1	+
breambac-139m23.f	Ga_group_01	69.86	730	168	11	15	714	7.25491e+06	7.25548e+06	2e-89	332			breambac-139m23	2	same	58306.6	1	+	MAX	breambac-139m23.f
breambac-99k3.r	Ga_group_01	86.76	136	15	1	38	170	7261932	7.26183e+06	2e-33	147			breambac-99k3	2	same	44022.4	-1	+
breambac-41e3.f	Ga_group_01	82.79	122	21	0	273	394	7.27174e+06	7.27164e+06	2e-28	129			breambac-41e3	2	same	51690.1	-1	+
breambac-115m2.r	Ga_group_01	80.49	205	33	4	2	204	7.27517e+06	7.27502e+06	2e-36	156			breambac-115m2	2	same	55062.7	-1	+
breambac-13n9.r	Ga_group_01	81.46	205	31	4	2	204	7.27517e+06	7.27502e+06	2e-38	163			breambac-13n9	2	same	55125.8	-1	+
breambac-109l4.r	Ga_group_01	72.94	218	44	4	305	508	7.27585e+06	7.27568e+06	3e-19	99.9			breambac-109l4	2	same	55737.8	-1	+
breambac-129n8.f	Ga_group_01	80.72	83	16	0	9	91	7.28141e+06	7.28135e+06	3e-14	82.4			breambac-129n8	2	same	49109.1	-1	+
breambac-26l7.r	Ga_group_01	83.41	458	68	2	1	450	7.2817e+06	7.28135e+06	3e-127	458			breambac-26l7	2	same	77958.8	-1	+		breambac-26l7.r
breambac-54h8.f	Ga_group_01	86.55	528	61	3	5	523	7.28176e+06	7.28135e+06	7e-162	573			breambac-54h8	2	same	61612.5	-1	+
breambac-117c7.r	Ga_group_01	82.92	445	65	5	163	599	7.28209e+06	7.28243e+06	2e-107	393			breambac-117c7	2	same	42676.6	1	+
breambac-24o13.r	Ga_group_01	79.08	153	29	2	60	212	7.28729e+06	7.28741e+06	7e-26	122			breambac-24o13	2	same	67525.4	1	+
breambac-120l24.r	Ga_group_01	77.19	285	58	3	281	565	7.29162e+06	7.29141e+06	4e-43	179			breambac-120l24	2	same	41708.5	-1	+
breambac-120n18.r	Ga_group_01	78.95	285	53	3	306	590	7.29162e+06	7.29141e+06	3e-48	196			breambac-120n18	2	same	41708.5	-1	+
breambac-25k7.f	Ga_group_01	74	427	74	6	168	569	7.29206e+06	7.29241e+06	2e-55	220			breambac-25k7	2	same	64371.8	1	+
breambac-77b12.r	Ga_group_01	81.29	433	62	4	165	584	7.29396e+06	7.29431e+06	6e-99	364			breambac-77b12	2	same	62575.2	1	+	MAX	breambac-77b12.r
breambac-71h4.f	Ga_group_01	86.6	306	38	2	5	309	7.29687e+06	7.29716e+06	3e-90	336			breambac-71h4	2	same	59651.2	1	+
breambac-139m23.r	Ga_group_01	76.92	78	18	0	411	488	7.31321e+06	7.31316e+06	5e-12	76.1			breambac-139m23	2	same	58306.6	-1	+		breambac-139m23.r
breambac-117c7.f	Ga_group_01	72.16	194	44	1	499	692	7.32476e+06	7.32462e+06	2e-23	114			breambac-117c7	2	same	42676.6	-1	+
breambac-32j19.f	Ga_group_01	82.69	52	9	0	522	573	7.32885e+06	7.32889e+06	7e-06	55.5			breambac-32j19	2	same	58587.7	1	+	MAX	breambac-32j19.f
breambac-61l14.f	Ga_group_01	77.68	327	64	3	264	584	7.33085e+06	7.33109e+06	1e-64	250			breambac-61l14	2	same	45661.5	1	+
breambac-24o13.f	Ga_group_01	81.73	405	65	5	147	548	7.35482e+06	7.35451e+06	1e-94	350			breambac-24o13	2	same	67525.4	-1	+
breambac-25k7.r	Ga_group_01	84.68	235	35	1	68	302	7.35643e+06	7.35626e+06	1e-64	250			breambac-25k7	2	same	64371.8	-1	+
breambac-71h4.r	Ga_group_01	76.15	348	78	2	3	346	7.35652e+06	7.35626e+06	2e-69	266			breambac-71h4	2	same	59651.2	-1	+
breambac-77b12.f	Ga_group_01	75.62	361	83	2	22	378	7.35653e+06	7.35626e+06	6e-71	271			breambac-77b12	2	same	62575.2	-1	+		breambac-77b12.f
breambac-59k18.r	Ga_group_01	87.16	109	14	0	535	643	7.36695e+06	7.36704e+06	3e-28	129			breambac-59k18	2	same	43858.2	1	+
breambac-125k19.f	Ga_group_01	85.32	109	16	0	563	671	7.36695e+06	7.36704e+06	8e-27	125			breambac-125k19	2	same	50788.1	1	+	MAX	breambac-125k19.f
breambac-10f8.f	Ga_group_01	80	200	30	3	18	213	7.37487e+06	7375019	4e-32	142	6		breambac-10f8	2	same	423254	1	-
breambac-61l14.r	Ga_group_01	83.72	215	32	3	1	214	7.37651e+06	7.37634e+06	4e-50	202			breambac-61l14	2	same	45661.5	-1	+
breambac-111d9.r	Ga_group_01	74.21	221	52	3	79	294	7.38339e+06	7.38356e+06	4e-31	139	6		breambac-111d9	2	same	395361	1	-
breambac-32j19.r	Ga_group_01	74.45	137	29	2	408	543	7.38744e+06	7.38734e+06	6e-14	82.4			breambac-32j19	2	same	58587.7	-1	+		breambac-32j19.r
breambac-125h17.r	Ga_group_01	78.04	214	44	1	270	480	7.39726e+06	7.39742e+06	3e-43	179	6		breambac-125h17	2	same	389709	1	-
breambac-85p9.r	Ga_group_01	86.1	223	30	1	439	660	7.40351e+06	7.40479e+06	1e-63	247			breambac-85p9	2	same	5.7594e+06	1	-
breambac-59k18.f	Ga_group_01	83.51	97	14	1	423	519	7.41081e+06	7.41074e+06	3e-17	93.5			breambac-59k18	2	same	43858.2	-1	+
breambac-110j6.f	Ga_group_01	82.38	210	36	1	1	209	7411276	7.41088e+06	3e-48	196	6		breambac-110j6	2	same	355879	-1	-
breambac-125k19.r	Ga_group_01	76.33	469	97	5	122	589	7.41774e+06	7.41735e+06	7e-89	331			breambac-125k19	2	same	50788.1	-1	+	Contig End	breambac-125k19.r
breambac-47f4.f	Ga_group_01	82.47	291	47	1	93	383	7.46772e+06	7.4675e+06	2e-75	286	6		breambac-47f4	2	same	385062	-1	-
breambac-58a16.r	Ga_group_01	86.01	143	17	1	564	706	7.46816e+06	7466856	6e-35	152			breambac-58a16	2	same	60046.5	-1	-
breambac-63k16.r	Ga_group_01	74.73	277	57	6	5	270	7.47604e+06	7.47582e+06	2e-34	150	6		breambac-63k16	2	same	352613	-1	-
breambac-101h8.f	Ga_group_01	82.35	391	56	6	22	401	7.49365e+06	7.49335e+06	7e-90	334	6		breambac-101h8	2	same	312788	-1	-
breambac-126d17.r	Ga_group_01	77.71	175	32	2	270	437	7.50435e+06	7.50448e+06	9e-28	128			breambac-126d17	2	same	66587.3	1	+	Contig Start	breambac-126d17.r
breambac-112g10.r	Ga_group_01	77.48	404	67	7	45	441	7.50841e+06	7.50871e+06	5e-65	252			breambac-112g10	2	same	67849.8	1	+
breambac-47g22.r	Ga_group_01	83.74	246	40	0	368	613	7.5201e+06	7520287	8e-69	264			breambac-47g22	2	same	74455	1	+
breambac-40d17.f	Ga_group_01	83.74	246	40	0	414	659	7.5201e+06	7520287	9e-69	264			breambac-40d17	2	same	75893.8	1	+	MAX	breambac-40d17.f
breambac-58a16.f	Ga_group_01	88.46	182	21	0	135	316	7.5269e+06	7.52673e+06	2e-56	223			breambac-58a16	2	same	60046.5	-1	-
breambac-126d17.f	Ga_group_01	87.95	498	58	2	148	644	7570935	7.57042e+06	3e-164	581			breambac-126d17	2	same	66587.3	-1	+		breambac-126d17.f
breambac-98f13.r	Ga_group_01	87.5	296	37	0	3	298	7.57498e+06	7.5753e+06	2e-95	353			breambac-98f13	2	same	50245.1	1	+	MAX	breambac-98f13.r
breambac-112g10.f	Ga_group_01	82.35	204	33	1	657	860	7.57626e+06	7.57607e+06	1e-48	198			breambac-112g10	2	same	67849.8	-1	+
breambac-47g22.f	Ga_group_01	88.59	263	30	0	69	331	7.59455e+06	7.5943e+06	2e-86	323			breambac-47g22	2	same	74455	-1	+
breambac-40d17.r	Ga_group_01	72.29	433	92	4	252	671	7.59599e+06	7.59565e+06	3e-59	232			breambac-40d17	2	same	75893.8	-1	+		breambac-40d17.r
breambac-55e15.f	Ga_group_01	82.05	273	49	0	388	660	7.62282e+06	7.62308e+06	4e-73	278			breambac-55e15	2	same	71022.5	1	+	MAX	breambac-55e15.f
breambac-98f13.f	Ga_group_01	82.35	272	41	1	2	273	7.62522e+06	7.6243e+06	7e-68	261			breambac-98f13	2	same	50245.1	-1	+		breambac-98f13.f
breambac-103n13.r	Ga_group_01	80.9	267	48	3	1	267	7.63049e+06	7.6308e+06	2e-57	226			breambac-103n13	2	same	56983.9	1	+
breambac-124h9.r	Ga_group_01	78.19	408	78	7	298	700	7.67062e+06	7.67115e+06	7e-78	294			breambac-124h9	2	same	45889.9	1	+
breambac-21o11.r	Ga_group_01	78.6	299	59	4	298	596	7.67062e+06	7.67106e+06	8e-60	234			breambac-21o11	2	same	67159.7	1	+
breambac-103n13.f	Ga_group_01	76.7	545	86	11	1	524	7.68747e+06	7.68707e+06	1e-82	310			breambac-103n13	2	same	56983.9	-1	+
breambac-115i23.r	Ga_group_01	82.32	198	33	2	148	345	7.6888e+06	7.68896e+06	3e-45	185			breambac-115i23	2	same	51899.5	1	+	MAX	breambac-115i23.r
breambac-55e15.r	Ga_group_01	78.77	325	54	5	406	718	7.69384e+06	7.6936e+06	9e-60	234			breambac-55e15	2	same	71022.5	-1	+		breambac-55e15.r
breambac-124h9.f	Ga_group_01	74.89	235	45	6	10	244	7.71651e+06	7.71634e+06	2e-24	117			breambac-124h9	2	same	45889.9	-1	+
breambac-21o11.f	Ga_group_01	82.22	90	16	0	61	150	7.73778e+06	7.73771e+06	3e-17	93.5			breambac-21o11	2	same	67159.7	-1	+
breambac-115i23.f	Ga_group_01	71.03	252	64	2	358	601	7.7407e+06	7.74051e+06	4e-31	139			breambac-115i23	2	same	51899.5	-1	+	Contig End	breambac-115i23.f
breambac-110j6.r	Ga_group_01	79.35	92	13	1	34	119	7.76669e+06	7.76676e+06	4e-10	69.7	6		breambac-110j6	2	same	355879	1	-
breambac-111d9.f	Ga_group_01	74.42	86	21	1	99	184	7.77868e+06	7.77875e+06	9e-07	58.6	6		breambac-111d9	2	same	395361	1	-
breambac-125h17.f	Ga_group_01	85.29	204	23	2	233	436	7.78682e+06	7.78697e+06	4e-50	202	6		breambac-125h17	2	same	389709	1	-
breambac-10f8.r	Ga_group_01	78.21	280	44	3	216	494	7.7979e+06	7.79812e+06	1e-49	201	6		breambac-10f8	2	same	423254	1	-
breambac-101h8.r	Ga_group_01	78.14	462	84	5	138	582	7.80597e+06	7.80614e+06	1e-93	347	6		breambac-101h8	2	same	312788	1	-
breambac-66h7.f	Ga_group_01	86.34	410	52	3	48	457	7.82779e+06	7.8281e+06	7e-123	443			breambac-66h7	2	same	66314.8	1	+	Contig Start	breambac-66h7.f
breambac-63k16.f	Ga_group_01	89.51	162	16	1	543	704	7.82844e+06	7.82831e+06	8e-48	194	6		breambac-63k16	2	same	352613	-1	-
breambac-47f4.r	Ga_group_01	82.25	417	71	2	178	591	7.85256e+06	7.85222e+06	9e-112	407	6		breambac-47f4	2	same	385062	-1	-
breambac-69n10.r	Ga_group_01	75.45	167	27	4	436	588	7.86872e+06	7.86885e+06	5e-14	82.4			breambac-69n10	2	same	59458.5	1	+
breambac-139d12.f	Ga_group_01	79.75	484	84	7	16	496	7.87294e+06	7.87337e+06	8e-104	380			breambac-139d12	2	same	55240.9	1	+
breambac-66l18.f	Ga_group_01	79.55	484	85	7	16	496	7.87294e+06	7.87337e+06	8e-103	377			breambac-66l18	2	same	57552.5	1	+	MAX	breambac-66l18.f
breambac-66h7.r	Ga_group_01	78.4	162	31	1	94	255	7.89411e+06	7.89399e+06	3e-29	133			breambac-66h7	2	same	66314.8	-1	+		breambac-66h7.r
breambac-139d12.r	Ga_group_01	76.35	203	43	4	17	219	7.92818e+06	7.92803e+06	1e-28	131			breambac-139d12	2	same	55240.9	-1	+
breambac-69n10.f	Ga_group_01	76.35	203	43	4	36	238	7.92818e+06	7.92803e+06	9e-29	131			breambac-69n10	2	same	59458.5	-1	+
breambac-66l18.r	Ga_group_01	72.73	66	18	0	114	179	7.93049e+06	7.93044e+06	0.0005	49.1			breambac-66l18	2	same	57552.5	-1	+	Contig End	breambac-66l18.r
breambac-32n12.f	Ga_group_01	85.63	348	43	4	3	345	7.97815e+06	7.97845e+06	4e-95	351			breambac-32n12	2	same	80652.8	1	+	Contig Start	breambac-32n12.f
breambac-105o21.rb120_b1.SCF	Ga_group_01	79.07	258	49	2	78	331	7978210	7978466	2e-54	215			breambac-105o21	2	same	60344	1	+
breambac-126g7.f	Ga_group_01	67.27	110	36	0	372	481	7.98005e+06	7.97996e+06	9e-08	61.8			breambac-126g7	2	same	766187	-1	+
breambac-38m20.r	Ga_group_01	65.45	110	38	0	479	588	7.98005e+06	7.97996e+06	2e-06	57.1			breambac-38m20	2	same	1.15773e+07	-1	-
breambac-49m11.f	Ga_group_01	65.5	200	68	1	1	199	7.98031e+06	7.98015e+06	3e-16	90.3			breambac-49m11	2	same	6.04579e+06	-1	-
breambac-35g14.f	Ga_group_01	65.02	203	69	2	1	201	7.98031e+06	7.98015e+06	6e-13	79.2			breambac-35g14	2	same	7.39813e+06	-1	-
breambac-43n11.f	Ga_group_01	69.1	233	71	1	47	278	7.98033e+06	7.98015e+06	3e-29	133			breambac-43n11	2	same	7.80678e+06	-1	-
breambac-112d21.f	Ga_group_01	89.41	803	76	2	1	794	8.00438e+06	8.00534e+06	0	912			breambac-112d21	2	same	91391.8	1	+
breambac-11g24.r	Ga_group_01	89.97	728	71	2	5	730	8.01842e+06	8.01912e+06	0	906			breambac-11g24	2	same	67723.4	1	+
breambac-105o21.fb120_b1.SCF	Ga_group_01	79.55	44	9	0	472	515	8038554	8038511	0.035	42			breambac-105o21	2	same	60344	-1	+
breambac-47o5.f	Ga_group_01	78.11	201	39	3	85	281	8.03926e+06	8.03953e+06	5e-34	148			breambac-47o5	2	same	56580	1	+
breambac-41n1.f	Ga_group_01	83.33	174	15	3	437	610	8.05601e+06	8.05613e+06	8e-28	128			breambac-41n1	2	same	75998.8	1	+	MAX	breambac-41n1.f
breambac-32n12.r	Ga_group_01	78.44	691	120	10	4	687	8.05881e+06	8058234	7e-141	504			breambac-32n12	2	same	80652.8	-1	+		breambac-32n12.r
breambac-54n6.r	Ga_group_01	77.56	156	35	0	1	156	8.0765e+06	8.07662e+06	2e-38	163			breambac-54n6	2	same	69185.5	1	+
breambac-11g24.f	Ga_group_01	85.71	357	48	2	484	839	8.08614e+06	8.08585e+06	5e-105	385			breambac-11g24	2	same	67723.4	-1	+
breambac-112d21.r	Ga_group_01	86.05	631	77	8	18	645	8.09578e+06	8.09527e+06	0	645			breambac-112d21	2	same	91391.8	-1	+
breambac-47o5.r	Ga_group_01	84.07	226	33	3	479	703	8.09584e+06	8.09567e+06	4e-53	212			breambac-47o5	2	same	56580	-1	+
breambac-110a19.f	Ga_group_01	87.02	208	23	2	237	444	8.10403e+06	8.10418e+06	2e-56	223			breambac-110a19	2	same	70291.2	1	+
breambac-40j9.r	Ga_group_01	78.85	156	24	4	605	751	8.12218e+06	8.1223e+06	1e-19	101			breambac-40j9	2	same	102004	1	+	MAX	breambac-40j9.r
breambac-63c20.f	Ga_group_01	77.65	528	81	10	1	526	8.1271e+06	8.12749e+06	4e-86	321			breambac-63c20	2	same	85906.2	1	+
breambac-59p7.f	Ga_group_01	82.05	78	14	0	1	78	8127107	8127184	1e-13	80.8			breambac-59p7	2	same	55040	1	+
breambac-41n1.r	Ga_group_01	81.72	268	43	4	226	489	8.13201e+06	8131779	2e-58	229			breambac-41n1	2	same	75998.8	-1	+		breambac-41n1.r
breambac-54n6.f	Ga_group_01	78.77	405	78	4	224	623	8.14568e+06	8.14542e+06	2e-87	326			breambac-54n6	2	same	69185.5	-1	+
breambac-110a19.r	Ga_group_01	75.67	337	65	5	86	415	8.17432e+06	8.16055e+06	4e-52	209			breambac-110a19	2	same	70291.2	-1	+
breambac-59p7.r	Ga_group_01	84.13	126	20	0	10	135	8182147	8182022	9e-31	137			breambac-59p7	2	same	55040	-1	+
breambac-2g2.r	Ga_group_01	81.69	284	39	13	466	742	8210409	8.21062e+06	1e-40	171			breambac-2g2	2	same	40876.1	1	+	MAX	breambac-2g2.r
breambac-63c20.r	Ga_group_01	83.84	198	29	2	18	215	8213009	8.21286e+06	1e-47	193			breambac-63c20	2	same	85906.2	-1	+
breambac-40j9.f	Ga_group_01	84.31	274	35	1	266	531	8224182	8.22393e+06	4e-73	278			breambac-40j9	2	same	102004	-1	+		breambac-40j9.f
breambac-2g2.f	Ga_group_01	75.55	319	65	6	183	498	8.25129e+06	8.25105e+06	5e-45	185			breambac-2g2	2	same	40876.1	-1	+	Contig End	breambac-2g2.f
breambac-72i7.f	Ga_group_01	82.61	92	16	0	708	799	8.25166e+06	8.25062e+06	3e-18	96.7			breambac-72i7	2	same	52186.5	-1	-
breambac-101m22.r	Ga_group_01	77.99	259	53	3	283	540	8.27817e+06	8.27837e+06	9e-50	201			breambac-101m22	2	same	47019.3	1	+	Contig Start	breambac-101m22.r
breambac-72i7.r	Ga_group_01	79.55	132	27	0	200	331	8.30281e+06	8.30271e+06	4e-27	125			breambac-72i7	2	same	52186.5	-1	-
breambac-101m22.f	Ga_group_01	86.61	224	14	2	148	371	8.32519e+06	8.32494e+06	7e-53	210			breambac-101m22	2	same	47019.3	-1	+	Contig End	breambac-101m22.f
breambac-22a10.f	Ga_group_01	84.24	552	66	6	154	694	8.32772e+06	8.32826e+06	3e-144	515			breambac-22a10	2	same	61428.2	1	+	Contig Start	breambac-22a10.f
breambac-122j10.f	Ga_group_01	86.88	343	43	2	364	706	8339550	8.33985e+06	4e-105	385			breambac-122j10	2	same	99090.6	1	+
breambac-78f4.f	Ga_group_01	82.84	204	29	3	393	590	8.34424e+06	8.3444e+06	1e-43	180			breambac-78f4	2	same	52403.6	1	+
breambac-41g8.r	Ga_group_01	71.88	128	35	1	22	148	8.3586e+06	8.35869e+06	7e-16	88.8			breambac-41g8	2	same	80148.5	1	+
breambac-109c5.r	Ga_group_01	72.19	169	46	1	168	335	8368702	8.36855e+06	7e-23	110			breambac-109c5	2	same	6.97042e+06	-1	-
breambac-76k20.f	Ga_group_01	75.28	178	42	1	1	176	8.37779e+06	8.37792e+06	3e-29	133			breambac-76k20	2	same	68215.1	1	+
breambac-132b21.r	Ga_group_01	78.97	195	30	4	262	456	8.37804e+06	8.37818e+06	1e-28	131			breambac-132b21	2	same	73015.2	1	+
breambac-9p9.r	Ga_group_01	85	220	29	2	79	295	8.3866e+06	8.38677e+06	4e-55	218			breambac-9p9	2	same	101754	1	+	MAX	breambac-9p9.r
breambac-75f14.r	Ga_group_01	88.61	202	21	1	515	714	8.3884e+06	8.38856e+06	1e-60	237			breambac-75f14	2	same	87726.1	1	+
breambac-22a10.r	Ga_group_01	86.57	201	24	1	85	282	8.38915e+06	8.38896e+06	4e-56	221			breambac-22a10	2	same	61428.2	-1	+		breambac-22a10.r
breambac-126i13.f	Ga_group_01	86.44	435	42	7	273	692	8.38925e+06	8.38968e+06	5e-116	421			breambac-126i13	2	same	86869	1	+
breambac-78f4.r	Ga_group_01	76.24	425	82	7	272	688	8.39664e+06	8.39633e+06	3e-69	266			breambac-78f4	2	same	52403.6	-1	+
breambac-64n23.r	Ga_group_01	87.95	83	10	0	463	545	8.3974e+06	8.39747e+06	1e-19	101			breambac-64n23	2	same	81073.8	1	+
breambac-23i22.f	Ga_group_01	68.42	152	47	1	351	502	8.40048e+06	8.40057e+06	2e-13	80.8			breambac-23i22	2	same	7.41604e+06	1	+
breambac-122j10.r	Ga_group_01	80.22	733	116	7	83	790	8.43864e+06	8.438e+06	6e-169	597			breambac-122j10	2	same	99090.6	-1	+
breambac-41g8.f	Ga_group_01	77.55	695	123	7	1	667	8.43874e+06	8.43814e+06	2e-138	496			breambac-41g8	2	same	80148.5	-1	+
breambac-76k20.r	Ga_group_01	88.03	117	14	0	622	738	8.446e+06	8.44591e+06	2e-32	144			breambac-76k20	2	same	68215.1	-1	+
breambac-132b21.f	Ga_group_01	85.05	281	39	1	367	644	8.45105e+06	8.45079e+06	3e-80	302			breambac-132b21	2	same	73015.2	-1	+
breambac-126i13.r	Ga_group_01	85.64	731	80	12	12	725	8.47612e+06	8.47547e+06	0	694			breambac-126i13	2	same	86869	-1	+
breambac-75f14.f	Ga_group_01	83.69	466	56	8	24	474	8.47613e+06	8.47578e+06	5e-111	404			breambac-75f14	2	same	87726.1	-1	+
breambac-64n23.f	Ga_group_01	71.71	661	146	14	40	677	8.47848e+06	8.47798e+06	4e-73	278			breambac-64n23	2	same	81073.8	-1	+
breambac-9p9.f	Ga_group_01	84.46	148	21	2	524	671	8488356	8.48824e+06	1e-32	144			breambac-9p9	2	same	101754	-1	+	Contig End	breambac-9p9.f
breambac-95a18.f	Ga_group_01	72.92	192	45	4	45	229	8.5113e+06	8.51145e+06	5e-19	98.3			breambac-95a18	2	same	6.57783e+06	1	-
breambac-119k20.r	Ga_group_01	75.78	161	37	2	62	222	8.54258e+06	8.54271e+06	1e-21	107			breambac-119k20	2	same	71268.2	1	+	Contig Start	breambac-119k20.r
breambac-57a5.r	Ga_group_01	84.73	131	18	1	306	436	8555285	8.55538e+06	6e-30	134			breambac-57a5	2	same	58781.5	1	+
breambac-123k8.f	Ga_group_01	79.53	342	50	6	1	327	8.56557e+06	8.56583e+06	9e-61	237			breambac-123k8	2	same	74310.7	1	+	MAX	breambac-123k8.f
breambac-117b11.f	Ga_group_01	80.43	276	42	6	23	289	8.56586e+06	8.56607e+06	9e-50	201			breambac-117b11	2	same	57878.4	1	+
breambac-28k23.r	Ga_group_01	80.15	262	40	5	3	254	8.56587e+06	8.56607e+06	2e-47	193			breambac-28k23	2	same	74036.8	1	+
breambac-28d2.r	Ga_group_01	82.33	215	27	3	225	431	8.56914e+06	8.56896e+06	2e-43	180			breambac-28d2	2	same	1.75492e+07	-1	-
breambac-119k20.f	Ga_group_01	80.98	205	33	2	329	532	8.61385e+06	8.6137e+06	1e-42	177			breambac-119k20	2	same	71268.2	-1	+		breambac-119k20.f
breambac-57a5.f	Ga_group_01	78.85	208	37	3	79	284	8.61407e+06	8.61391e+06	1e-36	156			breambac-57a5	2	same	58781.5	-1	+
breambac-117b11.r	Ga_group_01	79.61	466	60	6	14	462	8.62374e+06	8.6234e+06	3e-90	336			breambac-117b11	2	same	57878.4	-1	+
breambac-120l15.r	Ga_group_01	88.98	254	27	1	393	646	8.63759e+06	8.63783e+06	3e-81	305			breambac-120l15	2	same	112127	1	+	MAX	breambac-120l15.r
breambac-13g14.r	Ga_group_01	78.23	294	53	3	24	311	8.63792e+06	8.63824e+06	1e-54	217			breambac-13g14	2	same	100562	1	+
breambac-123k8.r	Ga_group_01	78.54	741	109	9	15	720	8.63988e+06	8.63925e+06	1e-144	516			breambac-123k8	2	same	74310.7	-1	+		breambac-123k8.r
breambac-28k23.f	Ga_group_01	79.17	504	83	4	1	497	8.63991e+06	8.6395e+06	1e-108	396			breambac-28k23	2	same	74036.8	-1	+
breambac-59f17.f	Ga_group_01	80.38	469	84	3	33	499	8.67202e+06	8672413	4e-118	427			breambac-59f17	2	same	106459	1	+	MAX	breambac-59f17.f
breambac-13g14.f	Ga_group_01	92.57	377	18	3	208	583	8.73848e+06	8.73811e+06	6e-131	470			breambac-13g14	2	same	100562	-1	+
breambac-120l15.f	Ga_group_01	79.74	385	69	5	150	532	8.74972e+06	8.74939e+06	2e-78	296			breambac-120l15	2	same	112127	-1	+		breambac-120l15.f
breambac-142d6.r	Ga_group_01	87.84	74	9	0	547	620	8.75662e+06	8.75667e+06	2e-16	90.3			breambac-142d6	2	same	71503.5	1	+
breambac-41j16.r	Ga_group_01	77.04	135	23	1	17	151	8775065	8775191	2e-18	96.7			breambac-41j16	2	same	87985	1	+	MAX	breambac-41j16.r
breambac-59f17.r	Ga_group_01	92.07	353	18	3	1	352	8.77848e+06	8777954	9e-119	429			breambac-59f17	2	same	106459	-1	+		breambac-59f17.r
breambac-132h7.f	Ga_group_01	83.06	608	75	6	1	583	8.77853e+06	8.77907e+06	1e-147	526			breambac-132h7	2	same	72420.8	1	+
breambac-105d16.r	Ga_group_01	96.32	163	3	3	1	160	8.80161e+06	8.80173e+06	3e-53	212			breambac-105d16	2	same	86025.1	1	+
breambac-142d6.f	Ga_group_01	79.74	681	102	13	3	669	8.82812e+06	8.82756e+06	1e-134	483			breambac-142d6	2	same	71503.5	-1	+
breambac-132h7.r	Ga_group_01	88.93	298	22	1	1	298	8.85095e+06	8.85066e+06	2e-78	296			breambac-132h7	2	same	72420.8	-1	+
breambac-95l12.r	Ga_group_01	78.88	251	30	4	388	625	8.85191e+06	8.85209e+06	3e-38	163			breambac-95l12	2	same	74715	1	+	MAX	breambac-95l12.r
breambac-41j16.f	Ga_group_01	90.51	274	25	1	3	275	8863050	8862777	7e-91	337			breambac-41j16	2	same	87985	-1	+		breambac-41j16.f
breambac-105d16.f	Ga_group_01	80.6	67	12	1	1	67	8.88763e+06	8.88758e+06	2e-06	57.1			breambac-105d16	2	same	86025.1	-1	+
breambac-6a10.f	Ga_group_01	75.16	318	61	4	442	758	8894568	8894868	7e-48	194			breambac-6a10	2	same	93280	1	+	MAX	breambac-6a10.f
breambac-95l12.f	Ga_group_01	76.75	271	59	3	274	542	8.92662e+06	8926398	8e-49	198			breambac-95l12	2	same	74715	-1	+		breambac-95l12.f
breambac-6a10.r	Ga_group_01	74.62	130	31	2	554	683	8987848	8987721	2e-14	84			breambac-6a10	2	same	93280	-1	+	Contig End	breambac-6a10.r
breambac-2c9.f	Ga_group_01	74.14	116	30	0	507	622	9069355	9069470	2e-16	90.3			breambac-2c9	2	same	70074	1	+	Contig Start	breambac-2c9.f
breambac-44d22.r	Ga_group_01	76.6	94	22	0	383	476	9.07804e+06	9.07797e+06	2e-13	80.8			breambac-44d22	2	same	3.2771e+06	-1	-
breambac-71o21.f	Ga_group_01	76.77	198	41	2	151	347	9.0815e+06	9.08164e+06	5e-33	145			breambac-71o21	2	same	84093.8	1	+
breambac-109o6.f	Ga_group_01	81.57	369	61	1	124	485	9.1021e+06	9.10241e+06	2e-97	359			breambac-109o6	2	same	62639.2	1	+
breambac-14a4.r	Ga_group_01	88.47	321	30	1	130	443	9.10214e+06	9.10241e+06	7e-102	374			breambac-14a4	2	same	57396.1	1	+
breambac-52g14.f	Ga_group_01	88.47	321	30	1	161	474	9.10214e+06	9.10241e+06	8e-102	374			breambac-52g14	2	same	79490.7	1	+	MAX	breambac-52g14.f
breambac-2c9.r	Ga_group_01	81.25	160	23	3	152	304	9139429	9139270	6e-27	125			breambac-2c9	2	same	70074	-1	+		breambac-2c9.r
breambac-14a4.f	Ga_group_01	75.36	69	17	0	430	498	9.15953e+06	9.15948e+06	2e-06	57.1			breambac-14a4	2	same	57396.1	-1	+
breambac-13h20.f	Ga_group_01	84.44	45	7	0	51	95	9.16152e+06	9.16156e+06	0.0002	50.7			breambac-13h20	2	same	67654.5	1	+
breambac-109o6.r	Ga_group_01	74.67	150	34	2	340	485	9.16474e+06	9.16463e+06	3e-18	96.7			breambac-109o6	2	same	62639.2	-1	+
breambac-71o21.r	Ga_group_01	82.34	419	44	8	217	619	9.16559e+06	9.16528e+06	3e-82	309			breambac-71o21	2	same	84093.8	-1	+
breambac-71g19.r	Ga_group_01	77.04	196	36	4	346	540	9.17506e+06	9.1752e+06	2e-26	123			breambac-71g19	2	same	76751.8	1	+
breambac-99g9.r	Ga_group_01	79.03	248	44	4	441	684	9.17555e+06	9.17574e+06	6e-45	185			breambac-99g9	2	same	86482.8	1	+	MAX	breambac-99g9.r
breambac-52g14.r	Ga_group_01	92.31	91	5	2	2	91	9.18163e+06	9.18153e+06	1e-20	104			breambac-52g14	2	same	79490.7	-1	+		breambac-52g14.r
breambac-13m16.f	Ga_group_01	71.79	475	109	6	6	465	9.18167e+06	9.18193e+06	3e-62	242			breambac-13m16	2	same	124966	1	+
breambac-65j3.f	Ga_group_01	92.24	116	9	0	434	549	9196180	9196295	1e-36	156			breambac-65j3	2	same	99371	1	+
breambac-119m21.r	Ga_group_01	86.96	276	26	4	288	557	9.21728e+06	9.21752e+06	1e-72	277			breambac-119m21	2	same	79075.2	1	+
breambac-13h20.r	Ga_group_01	97.64	423	10	0	185	607	9229178	9.22878e+06	3e-143	511			breambac-13h20	2	same	67654.5	-1	+
breambac-3k9.f	Ga_group_01	84.64	345	38	6	1	336	9.22939e+06	9.22974e+06	9e-57	223			breambac-3k9	2	same	18765.2	1	+
breambac-76f22.f	Ga_group_01	84.35	345	38	7	1	335	9.22939e+06	9.22974e+06	6e-53	210			breambac-76f22	2	same	77244.2	1	+
breambac-3k9.r	Ga_group_01	78.91	588	73	21	109	667	9.24816e+06	9.24762e+06	2e-75	286			breambac-3k9	2	same	18765.2	-1	+
breambac-20b10.r	Ga_group_01	84.74	249	34	2	224	469	9.24912e+06	9.24935e+06	2e-65	253			breambac-20b10	2	same	81699.6	1	+	MAX	breambac-20b10.r
breambac-71g19.f	Ga_group_01	92.47	186	14	0	1	186	9.25181e+06	9.25163e+06	3e-65	252			breambac-71g19	2	same	76751.8	-1	+
breambac-99g9.f	Ga_group_01	94.18	705	38	3	1	702	9.26203e+06	9261493	0	960			breambac-99g9	2	same	86482.8	-1	+		breambac-99g9.f
breambac-60m5.f	Ga_group_01	93.53	618	40	0	1	618	9.26204e+06	9.26305e+06	0	855			breambac-60m5	2	same	73269.8	1	+
breambac-124p8.f	Ga_group_01	83.7	227	32	4	1	223	9.27319e+06	9.27337e+06	7e-51	204			breambac-124p8	2	same	62210.9	1	+
breambac-36l23.r	Ga_group_01	86.05	258	27	3	215	464	9.27713e+06	9.27733e+06	6e-67	258			breambac-36l23	2	same	76526.9	1	+
breambac-65j3.r	Ga_group_01	71.56	109	31	0	1	109	9295551	9295443	2e-12	76.1			breambac-65j3	2	same	99371	-1	+
breambac-119m21.f	Ga_group_01	83.75	160	24	1	241	398	9.29636e+06	9.29545e+06	8e-38	161			breambac-119m21	2	same	79075.2	-1	+
breambac-133k12.f	Ga_group_01	81.89	359	45	5	34	392	9.30207e+06	9302356	1e-70	271			breambac-133k12	2	same	76948.4	1	+
breambac-76f22.r	Ga_group_01	83.72	129	20	1	319	447	9.30664e+06	9306540	3e-28	129			breambac-76f22	2	same	77244.2	-1	+
breambac-13m16.r	Ga_group_01	83.72	129	20	1	320	448	9.30664e+06	9306540	2e-28	129			breambac-13m16	2	same	124966	-1	+
breambac-133i12.r	Ga_group_01	81.94	144	25	1	256	399	9.30728e+06	9.30739e+06	1e-30	137			breambac-133i12	2	same	62634.5	1	+
breambac-40d3.f	Ga_group_01	88.94	208	21	2	494	701	9.32222e+06	9.32241e+06	1e-61	240			breambac-40d3	2	same	95943.9	1	+	MAX	breambac-40d3.f
breambac-20b10.f	Ga_group_01	88.52	305	30	2	6	309	9.33082e+06	9330497	1e-94	350			breambac-20b10	2	same	81699.6	-1	+		breambac-20b10.f
breambac-60m5.r	Ga_group_01	91.84	196	14	2	1	195	9.33531e+06	9.3351e+06	3e-62	242			breambac-60m5	2	same	73269.8	-1	+
breambac-124p8.r	Ga_group_01	80.85	47	9	0	656	702	9.33541e+06	9.33537e+06	0.0006	49.1			breambac-124p8	2	same	62210.9	-1	+
breambac-36l23.f	Ga_group_01	81.76	170	31	0	35	204	9.35366e+06	9.35328e+06	7e-39	164			breambac-36l23	2	same	76526.9	-1	+
breambac-133i12.f	Ga_group_01	73.42	158	41	1	518	674	9.36991e+06	9.36979e+06	5e-22	109			breambac-133i12	2	same	62634.5	-1	+
breambac-133k12.r	Ga_group_01	72.92	528	116	8	113	631	9.37901e+06	9.37862e+06	4e-73	278			breambac-133k12	2	same	76948.4	-1	+
breambac-52p22.r	Ga_group_01	87.5	352	41	2	73	424	9.37902e+06	9.37935e+06	2e-109	399	7		breambac-52p22	2	same	1.66337e+07	1	+
breambac-103c18.f	Ga_group_01	88.69	442	34	7	165	600	9.39898e+06	9.39932e+06	2e-128	462	7		breambac-103c18	2	same	1.66135e+07	1	+
breambac-40d3.r	Ga_group_01	67.5	160	50	1	5	164	9.41817e+06	9.41805e+06	5e-13	79.2			breambac-40d3	2	same	95943.9	-1	+	Contig End	breambac-40d3.r
breambac-110e22.r	Ga_group_01	74.77	107	25	1	179	285	9.46904e+06	9.46912e+06	1e-11	74.5			breambac-110e22	2	same	49742.3	1	+	Contig Start	breambac-110e22.r
breambac-140i23.f	Ga_group_01	70.15	479	129	4	156	626	9.49892e+06	9.49928e+06	9e-92	340			breambac-140i23	2	same	80914.2	1	+	MAX	breambac-140i23.f
breambac-118l24.f	Ga_group_01	77.3	423	75	4	1	403	9.51173e+06	9.51206e+06	2e-80	302			breambac-118l24	2	same	48269.1	1	+
breambac-110e22.f	Ga_group_01	79.28	362	63	3	144	499	9.51878e+06	9.51849e+06	2e-78	296			breambac-110e22	2	same	49742.3	-1	+		breambac-110e22.f
breambac-117k21.f	Ga_group_01	87.31	457	57	1	1	456	9.53135e+06	9.53181e+06	1e-149	532			breambac-117k21	2	same	80351.5	1	+	MAX	breambac-117k21.f
breambac-52j10.r	Ga_group_01	85.11	47	7	0	103	149	9552990	9.55303e+06	1e-05	53.9			breambac-52j10	2	same	587298	1	-
breambac-118l24.r	Ga_group_01	90.43	324	24	3	1	318	9.56e+06	9.55974e+06	3e-104	381			breambac-118l24	2	same	48269.1	-1	+
breambac-140i23.r	Ga_group_01	85.55	256	37	0	12	267	9.57983e+06	9.57955e+06	2e-76	290			breambac-140i23	2	same	80914.2	-1	+		breambac-140i23.r
breambac-33c5.r	Ga_group_01	84.64	332	46	3	1	328	9590121	9.5904e+06	9e-90	334			breambac-33c5	2	same	84042	1	+	MAX	breambac-33c5.r
breambac-117k21.r	Ga_group_01	78.12	361	77	2	328	686	9.6117e+06	9611417	9e-81	304			breambac-117k21	2	same	80351.5	-1	+		breambac-117k21.r
breambac-12o7.f	Ga_group_01	72.03	261	68	3	390	646	9.62566e+06	9.62597e+06	2e-35	153			breambac-12o7	2	same	76413.4	1	+	MAX	breambac-12o7.f
breambac-125i14.f	Ga_group_01	82.31	537	78	7	2	527	9.63091e+06	9.63137e+06	2e-130	469			breambac-125i14	2	same	60846.4	1	+
breambac-33c5.f	Ga_group_01	87.8	123	15	0	541	663	9674163	9.67404e+06	2e-36	156			breambac-33c5	2	same	84042	-1	+		breambac-33c5.f
breambac-125i14.r	Ga_group_01	88.02	384	45	1	267	649	9.69175e+06	9.69146e+06	4e-126	454			breambac-125i14	2	same	60846.4	-1	+
breambac-86g19.f	Ga_group_01	79.79	94	19	0	43	136	9.69247e+06	9.69254e+06	2e-16	90.3			breambac-86g19	2	same	47121.8	1	+	MAX	breambac-86g19.f
breambac-12o7.r	Ga_group_01	81.57	217	36	2	212	425	9.70208e+06	9.7019e+06	2e-48	196			breambac-12o7	2	same	76413.4	-1	+		breambac-12o7.r
breambac-97e12.r	Ga_group_01	85.27	224	26	1	459	675	9.71308e+06	9.71326e+06	3e-39	166			breambac-97e12	2	same	52078.8	1	+	MAX	breambac-97e12.r
breambac-86g19.r	Ga_group_01	87.61	113	11	2	124	236	9.73959e+06	9.7395e+06	5e-24	115			breambac-86g19	2	same	47121.8	-1	+		breambac-86g19.r
breambac-54b22.f	Ga_group_01	83.49	109	17	1	418	525	9.74284e+06	9742751	1e-21	107			breambac-54b22	2	same	65335.7	-1	-
breambac-97e12.f	Ga_group_01	78.06	465	80	5	4	449	9.76516e+06	9.76481e+06	7e-92	340			breambac-97e12	2	same	52078.8	-1	+	Contig End	breambac-97e12.f
breambac-122d3.r	Ga_group_01	76.55	226	46	2	364	585	9.79094e+06	9.79189e+06	1e-38	164			breambac-122d3	2	same	57040.8	1	+	Contig Start	breambac-122d3.r
breambac-16d22.f	Ga_group_01	76.04	217	45	2	384	596	9.79094e+06	9.79188e+06	2e-35	153			breambac-16d22	2	same	63275.8	1	+
breambac-54b22.r	Ga_group_01	87.31	134	17	0	329	462	9.80809e+06	9.80796e+06	2e-37	160			breambac-54b22	2	same	65335.7	-1	-
breambac-143p12.r	Ga_group_01	91.63	227	19	0	384	610	9.8086e+06	9.80877e+06	1e-79	301			breambac-143p12	2	same	98738.5	1	+	MAX	breambac-143p12.r
breambac-135o10.r	Ga_group_01	80.98	326	42	3	16	322	9.80933e+06	9.80961e+06	2e-69	266			breambac-135o10	2	same	93705	1	+
breambac-122d3.f	Ga_group_01	89.03	383	42	0	367	749	9.84798e+06	9847648	3e-132	475			breambac-122d3	2	same	57040.8	-1	+		breambac-122d3.f
breambac-48f15.r	Ga_group_01	90.4	656	47	4	6	648	9.85077e+06	9.85139e+06	0	787			breambac-48f15	2	same	6984.38	1	+
breambac-26b5.r	Ga_group_01	95.41	305	11	2	1	305	9.8509e+06	9.85121e+06	6e-116	420			breambac-26b5	2	same	75950.3	1	+	MAX	breambac-26b5.r
breambac-16d22.r	Ga_group_01	88.89	549	55	3	21	569	9.85422e+06	9.85372e+06	1e-175	619			breambac-16d22	2	same	63275.8	-1	+
breambac-48f15.f	Ga_group_01	76.22	143	31	2	482	624	9.85775e+06	9.85764e+06	3e-19	99.9			breambac-48f15	2	same	6984.38	-1	+
breambac-135o10.f	Ga_group_01	91.1	697	41	7	1	689	9.90304e+06	9.90248e+06	0	816			breambac-135o10	2	same	93705	-1	+
breambac-143p12.f	Ga_group_01	80.15	267	43	1	109	365	9.90734e+06	9.90702e+06	2e-59	232			breambac-143p12	2	same	98738.5	-1	+		breambac-143p12.f
breambac-26b5.f	Ga_group_01	80.5	282	36	6	221	496	9.92685e+06	9.92664e+06	3e-48	196			breambac-26b5	2	same	75950.3	-1	+	Contig End	breambac-26b5.f
breambac-44i3.r	Ga_group_01	88.62	123	14	0	641	763	9.9522e+06	9.95231e+06	2e-35	153			breambac-44i3	2	same	55815.5	1	+	Contig Start	breambac-44i3.r
breambac-76b7.f	Ga_group_01	80.2	293	43	7	31	310	9.96701e+06	9.96723e+06	1e-50	202			breambac-76b7	2	same	64376.2	1	+
breambac-96c14.r	Ga_group_01	80.2	293	43	7	10	289	9.96701e+06	9.96723e+06	1e-50	202			breambac-96c14	2	same	80754.9	1	+	MAX	breambac-96c14.r
breambac-44i3.f	Ga_group_01	78.86	123	22	1	9	131	1.0008e+07	1.00079e+07	3e-19	99.9			breambac-44i3	2	same	55815.5	-1	+		breambac-44i3.f
breambac-12g3.r	Ga_group_01	87.02	262	30	3	1	261	1.00294e+07	1.00296e+07	4e-73	278			breambac-12g3	2	same	74966.7	1	+	MAX	breambac-12g3.r
breambac-76b7.r	Ga_group_01	84.93	73	9	2	550	620	1.00314e+07	1.00313e+07	3e-08	63.4			breambac-76b7	2	same	64376.2	-1	+
breambac-96c14.f	Ga_group_01	78.48	237	26	7	18	254	1.00478e+07	1.00476e+07	2e-25	120			breambac-96c14	2	same	80754.9	-1	+		breambac-96c14.f
breambac-140h22.f	Ga_group_01	85.71	651	74	5	1	632	1.00824e+07	1.0083e+07	0	668			breambac-140h22	2	same	67167.8	1	+	MAX	breambac-140h22.f
breambac-12g3.f	Ga_group_01	74.79	702	141	9	7	686	1.01044e+07	1.01038e+07	2e-116	423			breambac-12g3	2	same	74966.7	-1	+		breambac-12g3.f
breambac-62g17.r	Ga_group_01	76	300	65	2	183	477	1.01259e+07	1.01261e+07	6e-56	221			breambac-62g17	2	same	72900.1	1	+	MAX	breambac-62g17.r
breambac-52j10.f	Ga_group_01	82	400	46	4	36	411	10139964	10140288	2e-89	332			breambac-52j10	2	same	587298	1	-
breambac-140h22.r	Ga_group_01	85.71	210	28	1	115	322	1.01496e+07	1.01494e+07	8e-58	228			breambac-140h22	2	same	67167.8	-1	+		breambac-140h22.r
breambac-62g17.f	Ga_group_01	83.33	258	34	4	349	606	1.01988e+07	10198628	6e-58	228			breambac-62g17	2	same	72900.1	-1	+	Contig End	breambac-62g17.f
breambac-124e20.f	Ga_group_01	68.94	602	146	9	103	671	1.02109e+07	1.02113e+07	7e-79	297			breambac-124e20	2	same	79420.2	1	+	Contig Start	breambac-124e20.f
breambac-35d3.f	Ga_group_01	72.48	723	152	11	186	867	1.02109e+07	1.02115e+07	4e-123	445			breambac-35d3	2	same	54955.6	1	+
breambac-144l16.r	Ga_group_01	77.16	232	43	3	371	597	1.02153e+07	1.02138e+07	9e-38	161			breambac-144l16	2	same	58077.8	-1	-
breambac-92f21.r	Ga_group_01	86.3	387	41	7	193	579	1.02236e+07	1.02239e+07	8e-100	367			breambac-92f21	2	same	78490.3	1	+
breambac-35d3.r	Ga_group_01	74.48	239	60	1	99	336	1.02659e+07	1.02657e+07	1e-46	190			breambac-35d3	2	same	54955.6	-1	+
breambac-89k1.r	Ga_group_01	78.26	138	27	3	1	135	10267200	1.02673e+07	3e-18	96.7			breambac-89k1	2	same	73768.9	1	+	MAX	breambac-89k1.r
breambac-144l16.f	Ga_group_01	80	520	82	9	38	538	1.02718e+07	1.02714e+07	2e-109	399			breambac-144l16	2	same	58077.8	-1	-
breambac-90i3.r	Ga_group_01	81.36	118	21	1	406	523	10272241	10272357	4e-22	109			breambac-90i3	2	same	67864	1	+
breambac-124e20.r	Ga_group_01	76	150	34	2	565	714	1.02903e+07	1.02901e+07	1e-21	107			breambac-124e20	2	same	79420.2	-1	+		breambac-124e20.r
breambac-114k13.f	Ga_group_01	84.29	312	44	2	280	587	1.02903e+07	1.02906e+07	1e-84	316			breambac-114k13	2	same	57262.5	1	+
breambac-92f21.f	Ga_group_01	88.5	339	36	3	51	388	1.03021e+07	1.03019e+07	2e-104	381			breambac-92f21	2	same	78490.3	-1	+
breambac-37f8.f	Ga_group_01	73.37	353	66	6	1	326	1.03059e+07	1.0306e+07	1e-40	171			breambac-37f8	2	same	58255	1	+	MAX	breambac-37f8.f
breambac-90i3.f	Ga_group_01	88.1	84	10	0	306	389	10340105	10340022	4e-20	103			breambac-90i3	2	same	67864	-1	+
breambac-89k1.f	Ga_group_01	76.32	435	87	4	97	531	1.0341e+07	1.03406e+07	8e-81	304			breambac-89k1	2	same	73768.9	-1	+		breambac-89k1.f
breambac-114k13.r	Ga_group_01	89.8	745	75	1	5	749	10347577	1.03468e+07	0	933			breambac-114k13	2	same	57262.5	-1	+
breambac-128l4.r	Ga_group_01	87.2	750	93	2	3	749	1.03476e+07	1.03483e+07	0	865			breambac-128l4	2	same	68521.6	1	+	MAX	breambac-128l4.r
breambac-78m24.r	Ga_group_01	82.76	174	28	2	44	215	1.0363e+07	1.03631e+07	3e-38	163			breambac-78m24	2	same	53178.6	1	+
breambac-37f8.r	Ga_group_01	77.83	433	79	3	105	524	1.03641e+07	1.03638e+07	9e-90	334			breambac-37f8	2	same	58255	-1	+		breambac-37f8.r
breambac-57o18.r	Ga_group_01	93.45	275	16	1	162	436	1.04125e+07	1.04127e+07	2e-100	369			breambac-57o18	2	same	1.19508e+07	1	+
breambac-78m24.f	Ga_group_01	77.78	135	21	4	510	635	1.04161e+07	1.0416e+07	1e-11	74.5			breambac-78m24	2	same	53178.6	-1	+
breambac-128l4.f	Ga_group_01	83.71	221	27	4	510	721	1.04161e+07	1.0416e+07	7e-47	191			breambac-128l4	2	same	68521.6	-1	+	Contig End	breambac-128l4.f
breambac-25g17.r	Ga_group_01	85.16	182	27	0	24	205	1.05411e+07	1.05413e+07	1e-50	204			breambac-25g17	2	same	44399.8	1	+	Contig Start	breambac-25g17.r
breambac-88o17.r	Ga_group_01	81.39	446	64	7	12	442	1.05415e+07	1.05418e+07	2e-97	359			breambac-88o17	2	same	1.48632e+07	1	+
breambac-25g17.f	Ga_group_01	90.09	222	22	0	54	275	1.05855e+07	1.05853e+07	1e-74	283			breambac-25g17	2	same	44399.8	-1	+	Contig End	breambac-25g17.f
breambac-135n19.f	Ga_group_01	84.51	71	11	0	494	564	1.06139e+07	1.0614e+07	4e-13	79.2			breambac-135n19	2	same	17335.9	1	+	Contig Start	breambac-135n19.f
breambac-135n19.r	Ga_group_01	93.3	388	26	0	305	692	10631258	1.0631e+07	6e-150	534			breambac-135n19	2	same	17335.9	-1	+	Contig End	breambac-135n19.r
breambac-51k1.r	Ga_group_01	70.66	242	71	0	91	332	1.06327e+07	1.06329e+07	3e-37	160			breambac-51k1	2	same	123385	1	+	Contig Start	breambac-51k1.r
breambac-133d12.r	Ga_group_01	86.75	679	84	1	1	679	1.06337e+07	1.06329e+07	0	776			breambac-133d12	2	same	7.16433e+06	-1	-
breambac-122n10.r	Ga_group_01	84.14	706	110	1	3	706	1.06406e+07	1.06413e+07	0	754			breambac-122n10	2	same	30848.4	1	+
breambac-122n10.f	Ga_group_01	86.53	735	90	5	1	728	10671416	1.06707e+07	0	800			breambac-122n10	2	same	30848.4	-1	+
breambac-51k1.f	Ga_group_01	76.42	318	75	0	259	576	1.07561e+07	1.07559e+07	1e-69	267			breambac-51k1	2	same	123385	-1	+	Contig End	breambac-51k1.f
breambac-26h18.f	Ga_group_01	78.57	308	64	1	184	491	10756206	10756511	2e-70	269			breambac-26h18	2	same	2913	1	+	Contig Start	breambac-26h18.f
breambac-135k5.r	Ga_group_01	81.79	593	99	3	4	593	1.07569e+07	10757360	5e-158	561			breambac-135k5	2	same	30220.2	1	+	MAX	breambac-135k5.r
breambac-26h18.r	Ga_group_01	88.26	264	31	0	189	452	10759119	10758856	3e-86	321			breambac-26h18	2	same	2913	-1	+		breambac-26h18.r
breambac-118o1.r	Ga_group_01	88.24	221	26	0	160	380	1.07714e+07	1.07716e+07	2e-70	269			breambac-118o1	2	same	42247.5	1	+	MAX	breambac-118o1.r
breambac-45h19.r	Ga_group_01	91.74	109	8	1	587	694	1.07716e+07	1.07715e+07	3e-30	136			breambac-45h19	2	same	50249.4	-1	-
breambac-135k5.f	Ga_group_01	83.39	271	37	3	399	664	1.07871e+07	1.07869e+07	2e-65	253			breambac-135k5	2	same	30220.2	-1	+		breambac-135k5.f
breambac-16n18.r	Ga_group_01	71.11	135	32	3	361	488	1.08069e+07	1.0807e+07	2e-06	57.1			breambac-16n18	2	same	98111.2	1	+	MAX	breambac-16n18.r
breambac-118o1.f	Ga_group_01	76.27	295	49	4	262	537	1.08136e+07	1.08134e+07	4e-44	182			breambac-118o1	2	same	42247.5	-1	+		breambac-118o1.f
breambac-71e5.f	Ga_group_01	81.13	159	30	0	1	159	1.08182e+07	1.08183e+07	8e-37	158			breambac-71e5	2	same	68111.7	1	+
breambac-45h19.f	Ga_group_01	89.84	551	36	7	4	551	1.08217e+07	10821226	8e-173	610			breambac-45h19	2	same	50249.4	-1	-
breambac-87k10.r	Ga_group_01	83.8	358	44	6	1	358	1.08249e+07	1.08252e+07	3e-84	315			breambac-87k10	2	same	93141.8	1	+	MAX	breambac-87k10.r
breambac-71e5.r	Ga_group_01	90.34	290	27	1	335	624	10886268	1.0886e+07	2e-98	362			breambac-71e5	2	same	68111.7	-1	+
breambac-16n18.f	Ga_group_01	77.04	135	30	1	1	134	1.0905e+07	1.09049e+07	1e-21	107			breambac-16n18	2	same	98111.2	-1	+		breambac-16n18.f
breambac-80j15.r	Ga_group_01	80.91	220	35	4	353	567	1.09081e+07	10908337	1e-41	174			breambac-80j15	2	same	45487.8	1	+	MAX	breambac-80j15.r
breambac-87k10.f	Ga_group_01	73.68	399	85	5	175	555	1.09181e+07	1.09175e+07	3e-58	229			breambac-87k10	2	same	93141.8	-1	+		breambac-87k10.f
breambac-80j15.f	Ga_group_01	89.77	88	9	0	29	116	1.09536e+07	1.09535e+07	5e-23	112			breambac-80j15	2	same	45487.8	-1	+	Contig End	breambac-80j15.f
breambac-129h2.fb120_b1.SCF	Ga_group_01	73.56	382	80	6	2	366	11023090	11023467	7e-50	201			breambac-129h2	2	same	60988	1	+	Contig Start	breambac-129h2.fb120_b1.SCF
breambac-22a11.f	Ga_group_01	82.91	199	23	2	15	203	1.10231e+07	1.10233e+07	4e-42	175			breambac-22a11	2	same	65858.5	1	+
breambac-41a11.r	Ga_group_01	85.31	599	67	10	214	810	1.10686e+07	1.10691e+07	2e-157	559			breambac-41a11	2	same	54679.6	1	+
breambac-40b4.r	Ga_group_01	90.79	369	29	4	251	617	1.10686e+07	1.1069e+07	6e-119	431			breambac-40b4	2	same	55909.8	1	+
breambac-67h10.f	Ga_group_01	78.56	527	100	8	1	520	1.10711e+07	1.10715e+07	6e-108	394			breambac-67h10	2	same	60276.2	1	+	MAX	breambac-67h10.f
breambac-123c3.r	Ga_group_01	76.37	491	104	7	11	494	1.10711e+07	1.10715e+07	1e-90	337			breambac-123c3	2	same	56135.2	1	+
breambac-97f3.r	Ga_group_01	77.13	223	42	3	510	728	1.10792e+07	1.10794e+07	7e-36	155			breambac-97f3	2	same	44097.5	1	+
breambac-129h2.rb120_b1.SCF	Ga_group_01	76.67	60	14	0	470	529	11084078	11084019	4e-05	52			breambac-129h2	2	same	60988	-1	+		breambac-129h2.rb120_b1.SCF
breambac-22a11.r	Ga_group_01	80	300	48	3	235	534	1.1089e+07	1.10887e+07	9e-63	244			breambac-22a11	2	same	65858.5	-1	+
breambac-134h19.f	Ga_group_01	87.92	265	32	0	281	545	1.11008e+07	1.1101e+07	1e-85	320			breambac-134h19	2	same	84193.2	1	+	MAX	breambac-134h19.f
breambac-83n6.r	Ga_group_01	93.43	609	31	6	1	602	1.11134e+07	1.11143e+07	0	778			breambac-83n6	2	same	65554.3	1	+
breambac-97f3.f	Ga_group_01	85.31	177	23	3	1	177	1.11233e+07	1.11231e+07	7e-41	171			breambac-97f3	2	same	44097.5	-1	+
breambac-41a11.f	Ga_group_01	85.39	178	23	3	3	180	1.11233e+07	1.11231e+07	4e-41	172			breambac-41a11	2	same	54679.6	-1	+
breambac-40b4.f	Ga_group_01	91.79	329	26	1	1	328	1.11245e+07	1.11242e+07	5e-117	424			breambac-40b4	2	same	55909.8	-1	+
breambac-123c3.f	Ga_group_01	63.49	126	45	1	16	140	1.11272e+07	1.11271e+07	0.005	46			breambac-123c3	2	same	56135.2	-1	+
breambac-67h10.r	Ga_group_01	68.48	257	74	4	209	459	1.11313e+07	1.11311e+07	3e-22	109			breambac-67h10	2	same	60276.2	-1	+		breambac-67h10.r
breambac-83n6.f	Ga_group_01	88.96	308	31	1	1	305	11178960	1.11787e+07	2e-100	369			breambac-83n6	2	same	65554.3	-1	+
breambac-134h19.r	Ga_group_01	83.33	186	19	4	558	731	1.1185e+07	1.11848e+07	1e-30	137			breambac-134h19	2	same	84193.2	-1	+	Contig End	breambac-134h19.r
breambac-98c15.f	Ga_group_01	89.56	316	30	3	362	677	1.12092e+07	1.12095e+07	2e-100	369			breambac-98c15	2	same	48616.5	1	+	Contig Start	breambac-98c15.f
breambac-120e3.r	Ga_group_01	84	100	16	0	33	132	1.12157e+07	1.12157e+07	4e-22	109			breambac-120e3	2	same	48935	1	+
breambac-93l19.f	Ga_group_01	86.93	199	21	2	287	481	1.12311e+07	1.12312e+07	6e-38	161			breambac-93l19	2	same	80209.1	1	+	MAX	breambac-93l19.f
breambac-98c15.r	Ga_group_01	88.96	616	65	3	22	636	1.12578e+07	1.12573e+07	0	733			breambac-98c15	2	same	48616.5	-1	+		breambac-98c15.r
breambac-120e3.f	Ga_group_01	75.19	133	25	2	9	133	1.12646e+07	1.12645e+07	5e-13	79.2			breambac-120e3	2	same	48935	-1	+
breambac-31l23.r	Ga_group_01	71.93	171	46	2	335	505	1.13068e+07	11306894	1e-19	101			breambac-31l23	2	same	9632290	1	-
breambac-93l19.r	Ga_group_01	77.61	134	25	4	271	400	1.13113e+07	1.13112e+07	6e-13	79.2			breambac-93l19	2	same	80209.1	-1	+	Contig End	breambac-93l19.r
breambac-44p3.f	Ga_group_01	70.42	142	39	1	155	296	1.13281e+07	1.1328e+07	1e-10	71.3			breambac-44p3	2	same	4.91345e+06	-1	-
breambac-44e4.r	Ga_group_01	92.25	413	28	4	352	761	1.13649e+07	1.13652e+07	1e-144	516			breambac-44e4	2	same	81263.2	1	+	Contig Start	breambac-44e4.r
breambac-13k10.r	Ga_group_01	84.09	572	53	16	1	565	1.13782e+07	1.13787e+07	5e-109	397			breambac-13k10	2	same	1383	1	+
breambac-13k10.f	Ga_group_01	86.31	168	21	2	527	693	1.13796e+07	1.13795e+07	4e-42	175			breambac-13k10	2	same	1383	-1	+
breambac-141m10.r	Ga_group_01	80.6	299	47	6	45	340	1.13892e+07	1.13894e+07	3e-50	202			breambac-141m10	2	same	72235.8	1	+	MAX	breambac-141m10.r
breambac-114l16.f	Ga_group_01	81.25	368	51	9	1	363	1.13998e+07	1.14e+07	7e-68	261			breambac-114l16	2	same	60854.4	1	+
breambac-44e4.f	Ga_group_01	72.63	179	40	4	49	220	1.14461e+07	1.1446e+07	1e-14	84			breambac-44e4	2	same	81263.2	-1	+		breambac-44e4.f
breambac-114l16.r	Ga_group_01	75.8	343	61	4	3	345	1.14606e+07	1.14604e+07	5e-55	218			breambac-114l16	2	same	60854.4	-1	+
breambac-141m10.f	Ga_group_01	79.2	226	41	2	135	358	1.14614e+07	1.14612e+07	5e-45	185			breambac-141m10	2	same	72235.8	-1	+	Contig End	breambac-141m10.f
breambac-135e11.r	Ga_group_01	80	105	20	1	34	138	1.14616e+07	1.14617e+07	3e-17	91.9			breambac-135e11	2	same	99127.5	1	+	Contig Start	breambac-135e11.r
breambac-13p2.r	Ga_group_01	82.69	260	38	2	16	275	1.14857e+07	1.14859e+07	1e-62	244			breambac-13p2	2	same	90774.1	1	+
breambac-79d21.f	Ga_group_01	75.76	495	92	9	251	724	1.15033e+07	1.15037e+07	2e-76	290			breambac-79d21	2	same	59583.6	1	+
breambac-82j16.r	Ga_group_01	75.27	93	19	1	29	117	1.1504e+07	1.15041e+07	8e-08	61.8			breambac-82j16	2	same	80844.4	1	+	MAX	breambac-82j16.r
breambac-109l22.r	Ga_group_01	82.69	52	9	0	179	230	1.15157e+07	1.15158e+07	7e-06	55.5			breambac-109l22	2	same	69154.5	1	+
breambac-2p7.r	Ga_group_01	84.96	133	20	0	513	645	1.15227e+07	11522620	2e-34	150			breambac-2p7	2	same	4.26165e+06	-1	-
breambac-135e11.f	Ga_group_01	84.26	216	33	1	55	270	1.15607e+07	1.15605e+07	2e-57	226			breambac-135e11	2	same	99127.5	-1	+		breambac-135e11.f
breambac-79d21.r	Ga_group_01	83.55	231	36	2	1	230	1.15629e+07	1.15627e+07	2e-58	229			breambac-79d21	2	same	59583.6	-1	+
breambac-13p2.f	Ga_group_01	85.15	229	31	1	98	323	1.15765e+07	1.15763e+07	8e-63	244			breambac-13p2	2	same	90774.1	-1	+
breambac-82j16.f	Ga_group_01	91.3	632	33	6	8	624	1.15849e+07	1.15843e+07	0	740			breambac-82j16	2	same	80844.4	-1	+	Contig End	breambac-82j16.f
breambac-109l22.f	Ga_group_01	91.26	778	43	7	1	763	11584889	1.1584e+07	0	917			breambac-109l22	2	same	69154.5	-1	+
breambac-106n11.r	Ga_group_01	86.63	621	66	9	2	614	1.15942e+07	1.15948e+07	1e-179	632			breambac-106n11	2	same	66547.9	1	+	Contig Start	breambac-106n11.r
breambac-53m9.r	Ga_group_01	79.69	192	32	3	3	191	1.16294e+07	1.16295e+07	2e-33	147			breambac-53m9	2	same	108007	1	+	MAX	breambac-53m9.r
breambac-106n11.f	Ga_group_01	76.53	605	123	8	44	644	1.16608e+07	1.16601e+07	4e-114	415			breambac-106n11	2	same	66547.9	-1	+		breambac-106n11.f
breambac-70b13.f	Ga_group_01	82.72	434	56	7	4	437	1.16608e+07	1.16612e+07	1e-99	366			breambac-70b13	2	same	90369.1	1	+	MAX	breambac-70b13.f
breambac-116j8.r	Ga_group_01	79.55	538	79	6	7	531	1.16608e+07	1.16613e+07	2e-106	389			breambac-116j8	2	same	76543.5	1	+
breambac-56k3.f	Ga_group_01	72.6	73	20	0	168	240	1.16756e+07	1.16756e+07	2e-05	53.9			breambac-56k3	2	same	68883.5	1	+
breambac-139c24.r	Ga_group_01	83.68	821	86	8	1	787	1.16816e+07	1.16823e+07	0	760			breambac-139c24	2	same	63224.2	1	+
breambac-116j8.f	Ga_group_01	82.87	216	27	1	509	714	1.17374e+07	1.17372e+07	3e-50	202			breambac-116j8	2	same	76543.5	-1	+
breambac-53m9.f	Ga_group_01	74.29	105	17	1	493	587	1.17374e+07	1.17373e+07	2e-07	60.2			breambac-53m9	2	same	108007	-1	+		breambac-53m9.f
breambac-56k3.r	Ga_group_01	73.79	683	136	7	17	671	11744463	1.17426e+07	2e-107	393			breambac-56k3	2	same	68883.5	-1	+
breambac-86j9.f	Ga_group_01	76.26	417	80	6	8	410	1.17445e+07	1.17448e+07	4e-73	278			breambac-86j9	2	same	71395.7	1	+	MAX	breambac-86j9.f
breambac-139c24.f	Ga_group_01	81.88	160	28	1	149	308	1.17448e+07	1.17447e+07	8e-36	153			breambac-139c24	2	same	63224.2	-1	+
breambac-70b13.r	Ga_group_01	84.03	714	104	6	1	708	1.17512e+07	1.17507e+07	0	708			breambac-70b13	2	same	90369.1	-1	+		breambac-70b13.r
breambac-85c15.r	Ga_group_01	89.44	540	53	3	157	692	1.17608e+07	1.17612e+07	0	646			breambac-85c15	2	same	59107.1	1	+
breambac-99a5.f	Ga_group_01	88.32	625	68	4	3	623	1.17891e+07	1.17896e+07	0	689			breambac-99a5	2	same	56109.5	1	+	MAX	breambac-99a5.f
breambac-86j9.r	Ga_group_01	79.36	344	66	3	337	678	1.18159e+07	1.18156e+07	5e-75	285			breambac-86j9	2	same	71395.7	-1	+		breambac-86j9.r
breambac-131e1.r	Ga_group_01	76.96	217	34	4	473	689	1.18165e+07	1.18167e+07	8e-27	125			breambac-131e1	2	same	74443.4	1	+
breambac-85c15.f	Ga_group_01	83.44	489	63	5	1	489	1.18199e+07	1.18195e+07	9e-125	450			breambac-85c15	2	same	59107.1	-1	+
breambac-79h6.r	Ga_group_01	84.58	895	97	10	1	858	1.18309e+07	1.18317e+07	0	825			breambac-79h6	2	same	65873.7	1	+
breambac-139k24.f	Ga_group_01	81.36	59	11	0	3	61	11838759	11838817	2e-07	60.2			breambac-139k24	2	same	78232	1	+	MAX	breambac-139k24.f
breambac-99a5.r	Ga_group_01	84.97	326	34	5	4	317	1.18452e+07	1.1845e+07	3e-79	299			breambac-99a5	2	same	56109.5	-1	+		breambac-99a5.r
breambac-8g3.f	Ga_group_01	77.96	422	65	6	1	401	1.18635e+07	1.18639e+07	2e-73	278			breambac-8g3	2	same	66953.4	1	+
breambac-131e1.f	Ga_group_01	75	176	42	1	232	407	1.1891e+07	1.18908e+07	2e-28	129			breambac-131e1	2	same	74443.4	-1	+
breambac-138h24.f	Ga_group_01	71.79	234	54	2	28	261	1.18922e+07	1.18923e+07	7e-39	164			breambac-138h24	2	same	59259.6	1	+	MAX	breambac-138h24.f
breambac-79h6.f	Ga_group_01	88.89	252	28	0	3	254	1.18968e+07	1.18966e+07	3e-83	312			breambac-79h6	2	same	65873.7	-1	+
breambac-139k24.r	Ga_group_01	68.52	108	30	1	14	121	11916991	11916888	0.0002	50.7			breambac-139k24	2	same	78232	-1	+		breambac-139k24.r
breambac-8g3.r	Ga_group_01	84.36	422	61	4	376	795	1.19305e+07	1.19301e+07	5e-116	421			breambac-8g3	2	same	66953.4	-1	+
breambac-138h24.r	Ga_group_01	89.48	580	49	5	1	576	1.19514e+07	1.19509e+07	0	659			breambac-138h24	2	same	59259.6	-1	+	Contig End	breambac-138h24.r
breambac-38f7.f	Ga_group_01	90.82	403	36	1	1	403	1.19515e+07	1.19519e+07	1e-143	513			breambac-38f7	2	same	32770.4	1	+	Contig Start	breambac-38f7.f
breambac-4e10.f	Ga_group_01	76.74	258	54	3	191	442	1.19585e+07	1.19587e+07	1e-45	187			breambac-4e10	2	same	55131	1	+
breambac-71a7.r	Ga_group_01	83.55	152	25	0	341	492	1.19607e+07	1.19609e+07	2e-38	163			breambac-71a7	2	same	36933.5	1	+
breambac-62d23.f	Ga_group_01	75.65	115	28	0	502	616	11960961	11961075	7e-18	95.1			breambac-62d23	2	same	27804	1	+
breambac-84f17.r	Ga_group_01	80.04	506	80	6	256	744	1.19703e+07	1.19708e+07	3e-110	402			breambac-84f17	2	same	51198.4	1	+
breambac-1g6.f	Ga_group_01	79.47	487	88	7	6	486	11976974	1.19773e+07	3e-104	381			breambac-1g6	2	same	61495.2	1	+	MAX	breambac-1g6.f
breambac-38f7.r	Ga_group_01	79.35	92	19	0	503	594	1.19843e+07	1.19842e+07	2e-15	87.2			breambac-38f7	2	same	32770.4	-1	+		breambac-38f7.r
breambac-62d23.r	Ga_group_01	66.36	110	37	0	87	196	11988765	11988656	7e-07	58.6			breambac-62d23	2	same	27804	-1	+
breambac-71a7.f	Ga_group_01	76.9	407	77	7	221	624	1.19977e+07	1.19973e+07	2e-68	263			breambac-71a7	2	same	36933.5	-1	+
breambac-111c20.r	Ga_group_01	79.38	417	77	2	39	449	1.20071e+07	1.20075e+07	3e-101	372			breambac-111c20	2	same	50237.6	1	+
breambac-4e10.r	Ga_group_01	82.38	193	30	3	427	615	1.20136e+07	1.20135e+07	3e-40	169			breambac-4e10	2	same	55131	-1	+
breambac-84f17.f	Ga_group_01	80	520	98	4	143	662	12021548	1.20212e+07	1e-126	456			breambac-84f17	2	same	51198.4	-1	+
breambac-70c4.r	Ga_group_01	80.41	148	27	2	60	207	1.20338e+07	12033920	8e-27	125			breambac-70c4	2	same	77788.3	1	+
breambac-59e14.r	Ga_group_01	82	50	9	0	541	590	12034587	12034636	5e-05	52.3			breambac-59e14	2	same	62432	1	+
breambac-122h24.f	Ga_group_01	70.87	127	37	0	329	455	1.20357e+07	1.20358e+07	6e-15	85.6			breambac-122h24	2	same	92738.4	1	+	MAX	breambac-122h24.f
breambac-1g6.r	Ga_group_01	75.62	566	120	9	3	563	1.20385e+07	1.2038e+07	5e-98	361			breambac-1g6	2	same	61495.2	-1	+		breambac-1g6.r
breambac-8m6.r	Ga_group_01	72.89	166	37	2	4	161	1.20573e+07	1.20572e+07	9e-18	95.1			breambac-8m6	2	same	3.96258e+06	-1	-
breambac-111c20.f	Ga_group_01	74.76	206	42	3	9	204	1.20574e+07	1.20572e+07	2e-26	123			breambac-111c20	2	same	50237.6	-1	+
breambac-100e23.f	Ga_group_01	87.24	196	25	0	322	517	1.20577e+07	1.20578e+07	3e-59	232			breambac-100e23	2	same	74638.2	1	+
breambac-78g4.f	Ga_group_01	86.22	196	27	0	410	605	1.20577e+07	1.20578e+07	7e-58	228			breambac-78g4	2	same	76627	1	+
breambac-63m12.f	Ga_group_01	83	594	70	11	94	670	1.20665e+07	1.2067e+07	1e-133	480			breambac-63m12	2	same	105293	1	+	MAX	breambac-63m12.f
breambac-24b8.r	Ga_group_01	77.72	404	81	4	98	495	1.20959e+07	1.20963e+07	1e-82	310			breambac-24b8	2	same	61950.1	1	+
breambac-59e14.f	Ga_group_01	96.3	81	3	0	560	640	12097019	12096939	2e-25	120			breambac-59e14	2	same	62432	-1	+
breambac-70c4.f	Ga_group_01	70.7	215	63	0	196	410	1.21116e+07	1.21114e+07	4e-32	142			breambac-70c4	2	same	77788.3	-1	+
breambac-122h24.r	Ga_group_01	82.42	165	27	1	574	738	1.21285e+07	1.21283e+07	3e-37	160			breambac-122h24	2	same	92738.4	-1	+		breambac-122h24.r
breambac-100e23.r	Ga_group_01	77.63	76	12	1	785	855	1.21323e+07	1.21322e+07	8e-05	52.3			breambac-100e23	2	same	74638.2	-1	+
breambac-78g4.r	Ga_group_01	85.61	278	38	2	413	688	1.21343e+07	1.21341e+07	2e-78	296			breambac-78g4	2	same	76627	-1	+
breambac-97k3.f	Ga_group_01	84.15	82	12	1	170	250	1.21347e+07	1.21348e+07	1e-13	80.8			breambac-97k3	2	same	72385.5	1	+	MAX	breambac-97k3.f
breambac-24b8.f	Ga_group_01	84.27	89	13	1	102	190	1.21579e+07	1.21578e+07	7e-16	88.8			breambac-24b8	2	same	61950.1	-1	+
breambac-63m12.r	Ga_group_01	86.54	156	11	3	395	541	1.21718e+07	1.21716e+07	3e-32	142			breambac-63m12	2	same	105293	-1	+		breambac-63m12.r
breambac-97k3.r	Ga_group_01	85.95	299	39	2	163	461	1.22071e+07	1.2207e+07	1e-83	313			breambac-97k3	2	same	72385.5	-1	+	Contig End	breambac-97k3.r
breambac-120p13.f	Ga_group_01	75	136	29	2	61	195	12211182	12211313	5e-15	85.6			breambac-120p13	2	same	48275	1	+	Contig Start	breambac-120p13.f
breambac-43j3.f	Ga_group_01	85.59	451	48	3	1	440	1.22252e+07	1.22256e+07	2e-127	459			breambac-43j3	2	same	51211.2	1	+	MAX	breambac-43j3.f
breambac-115f7.f	Ga_group_01	85.2	446	49	3	3	437	1.22252e+07	1.22256e+07	3e-124	448			breambac-115f7	2	same	48691.2	1	+
breambac-120p13.r	Ga_group_01	81.85	259	39	3	265	517	12259457	12259201	2e-57	226			breambac-120p13	2	same	48275	-1	+		breambac-120p13.r
breambac-115f7.r	Ga_group_01	77.45	501	76	9	218	702	1.22739e+07	1.22733e+07	1e-81	307			breambac-115f7	2	same	48691.2	-1	+
breambac-43j3.r	Ga_group_01	79.12	249	42	3	455	693	1.22764e+07	1.22762e+07	7e-47	191			breambac-43j3	2	same	51211.2	-1	+	Contig End	breambac-43j3.r
breambac-92e24.f	Ga_group_01	79.13	230	46	2	340	568	1.22803e+07	1.22805e+07	2e-48	196			breambac-92e24	2	same	74768.5	1	+	Contig Start	breambac-92e24.f
breambac-105a20.f	Ga_group_01	89.82	570	40	3	1	552	1.22972e+07	1.22977e+07	0	668			breambac-105a20	2	same	1.58454e+07	1	+
breambac-92e24.r	Ga_group_01	92.99	214	12	2	1	214	1.23551e+07	1.23548e+07	3e-71	272			breambac-92e24	2	same	74768.5	-1	+	Contig End	breambac-92e24.r
breambac-44d22.f	Ga_group_01	92.17	230	15	2	16	245	1.23551e+07	1.23548e+07	5e-76	288			breambac-44d22	2	same	3.2771e+06	-1	-
breambac-53i23.f	Ga_group_01	85.95	484	67	1	39	521	1.23838e+07	1.23843e+07	8e-153	543			breambac-53i23	2	same	93107.2	1	+	Contig Start	breambac-53i23.f
breambac-66h8.f	Ga_group_01	78.08	73	16	0	2	74	1.24034e+07	1.24035e+07	2e-09	66.6			breambac-66h8	2	same	9.68722e+06	1	-
breambac-61c22.r	Ga_group_01	86.1	187	22	2	32	216	1.24656e+07	1.24654e+07	2e-47	193			breambac-61c22	2	same	5.87775e+06	-1	-
breambac-53i23.r	Ga_group_01	78.32	286	50	4	264	537	1.24769e+07	12476683	1e-51	207			breambac-53i23	2	same	93107.2	-1	+	Contig End	breambac-53i23.r
breambac-142e1.r	Ga_group_01	84.28	547	77	4	3	546	1.24844e+07	1.24849e+07	1e-154	549			breambac-142e1	2	same	76799.9	1	+	Contig Start	breambac-142e1.r
breambac-115e20.f	Ga_group_01	86.22	341	37	3	274	605	1.2507e+07	1.25072e+07	1e-95	353			breambac-115e20	2	same	88700.6	1	+
breambac-7l8.f	Ga_group_01	82.08	173	27	4	542	713	1.2512e+07	1.25122e+07	4e-31	139			breambac-7l8	2	same	125913	1	+	MAX	breambac-7l8.f
breambac-111e9.f	Ga_group_01	77.8	617	125	3	101	705	1.25253e+07	1.25247e+07	7e-141	504			breambac-111e9	2	same	1.17252e+07	-1	-
breambac-91f17.f	Ga_group_01	74.78	345	62	8	305	635	1.25276e+07	1.25278e+07	1e-40	171			breambac-91f17	2	same	68529.3	1	+
breambac-111g8.f	Ga_group_01	79.15	235	43	2	2	236	1.25299e+07	1.25301e+07	2e-47	193			breambac-111g8	2	same	65758.5	1	+
breambac-142e1.f	Ga_group_01	70.82	257	62	6	28	274	1.25612e+07	1.2561e+07	4e-20	103			breambac-142e1	2	same	76799.9	-1	+		breambac-142e1.f
breambac-111g8.r	Ga_group_01	73.83	493	77	11	74	534	1.25957e+07	1.25953e+07	2e-48	196			breambac-111g8	2	same	65758.5	-1	+
breambac-115e20.r	Ga_group_01	73.3	558	88	12	71	596	1.25957e+07	1.25953e+07	2e-55	220			breambac-115e20	2	same	88700.6	-1	+
breambac-91f17.r	Ga_group_01	78.02	232	42	4	460	686	1.25962e+07	1.2596e+07	8e-38	161			breambac-91f17	2	same	68529.3	-1	+
breambac-61m24.f	Ga_group_01	89.88	326	28	3	195	520	1.26111e+07	1.26114e+07	2e-101	372			breambac-61m24	2	same	62703.6	1	+
breambac-144h23.f	Ga_group_01	94.55	165	7	1	297	461	1.26111e+07	1.26113e+07	9e-54	213			breambac-144h23	2	same	77589.5	1	+
breambac-67l18.r	Ga_group_01	86.85	517	55	7	191	696	1.26202e+07	1.26207e+07	2e-148	529			breambac-67l18	2	same	84492.5	1	+
breambac-142e21.r	Ga_group_01	77.22	158	32	2	431	587	1.26227e+07	1.26228e+07	5e-24	115			breambac-142e21	2	same	66300.2	1	+
breambac-75i13.r	Ga_group_01	76.43	157	33	2	434	589	1.26227e+07	1.26228e+07	1e-22	110			breambac-75i13	2	same	111006	1	+
breambac-110i4.r	Ga_group_01	82.82	390	62	5	1	389	1.26335e+07	1.26337e+07	1e-97	359			breambac-110i4	2	same	108325	1	+	MAX	breambac-110i4.r
breambac-7l8.r	Ga_group_01	80.56	252	45	3	72	323	1.26379e+07	1.26378e+07	5e-54	215			breambac-7l8	2	same	125913	-1	+		breambac-7l8.r
breambac-61m24.r	Ga_group_01	87.04	486	56	6	1	483	1.26738e+07	1.26734e+07	2e-142	508			breambac-61m24	2	same	62703.6	-1	+
breambac-144h23.r	Ga_group_01	83.23	334	36	4	330	663	1.26887e+07	1.26884e+07	1e-73	280			breambac-144h23	2	same	77589.5	-1	+
breambac-142e21.f	Ga_group_01	80	360	64	4	15	367	1.2689e+07	1.26887e+07	9e-82	307			breambac-142e21	2	same	66300.2	-1	+
breambac-67l18.f	Ga_group_01	85.71	98	12	1	593	690	1.27047e+07	1.27046e+07	1e-19	101			breambac-67l18	2	same	84492.5	-1	+
breambac-68k12.f	Ga_group_01	89.19	37	4	0	589	625	12705006	12705042	0.001	47.5			breambac-68k12	2	same	107006	1	+
breambac-6f13.r	Ga_group_01	76.03	267	58	5	87	352	1.27191e+07	1.27193e+07	2e-45	187			breambac-6f13	2	same	78630.7	1	+
breambac-143j24.f	Ga_group_01	79.71	207	36	5	2	207	1.27191e+07	1.27193e+07	3e-36	155			breambac-143j24	2	same	83967	1	+
breambac-97d14.r	Ga_group_01	82.55	235	31	4	359	593	1.27194e+07	1.27196e+07	2e-48	196			breambac-97d14	2	same	78363	1	+
breambac-40b10.f	Ga_group_01	87.12	163	20	1	1	163	1.2724e+07	1.27241e+07	1e-44	183			breambac-40b10	2	same	143340	1	+	MAX	breambac-40b10.f
breambac-32h19.r	Ga_group_01	86.12	461	48	4	43	494	1.27255e+07	1.27259e+07	8e-131	470			breambac-32h19	2	same	107894	1	+
breambac-138i20.f	Ga_group_01	85.49	696	78	5	1	678	1.27276e+07	12728273	0	708			breambac-138i20	2	same	105804	1	+
breambac-40n7.f	Ga_group_01	77.78	144	30	2	554	696	1.2732e+07	1.27321e+07	5e-22	109	4		breambac-40n7	2	same	6.22161e+06	1	-
breambac-75i13.f	Ga_group_01	84.93	438	46	8	47	483	1.27337e+07	1.27333e+07	4e-107	391			breambac-75i13	2	same	111006	-1	+
breambac-110i4.f	Ga_group_01	88.6	307	35	0	395	701	1.27418e+07	1.27415e+07	1e-102	377			breambac-110i4	2	same	108325	-1	+		breambac-110i4.f
breambac-68h7.f	Ga_group_01	70.33	583	136	12	27	584	1.2742e+07	1.27424e+07	7e-59	231			breambac-68h7	2	same	90701.2	1	+
breambac-52g11.f	Ga_group_01	90.79	228	21	0	3	230	1.27468e+07	12747018	2e-78	296	4		breambac-52g11	2	same	6.23649e+06	1	-
breambac-10c22.r	Ga_group_01	78.72	564	98	10	1	551	1.27664e+07	1.27668e+07	8e-103	377	4		breambac-10c22	2	same	6.25631e+06	1	-
breambac-86b15.f	Ga_group_01	68.29	123	36	1	235	354	12766520	12766642	8e-09	65			breambac-86b15	2	same	87821	1	+
breambac-97d14.f	Ga_group_01	85.4	363	43	5	145	503	1.27977e+07	1.27974e+07	8e-93	343			breambac-97d14	2	same	78363	-1	+
breambac-6f13.f	Ga_group_01	82.7	526	76	8	145	665	1.27977e+07	1.27973e+07	1e-124	450			breambac-6f13	2	same	78630.7	-1	+
breambac-143j24.r	Ga_group_01	84.32	440	61	2	30	461	1.28031e+07	1.28026e+07	1e-126	456			breambac-143j24	2	same	83967	-1	+
breambac-62p10.f	Ga_group_01	83.12	468	60	4	1	468	1.28032e+07	1.28036e+07	2e-117	426			breambac-62p10	2	same	64127.5	1	+
breambac-66f7.f	Ga_group_01	83.12	468	60	4	1	468	1.28032e+07	1.28036e+07	1e-117	426			breambac-66f7	2	same	64127.5	1	+
breambac-77o9.r	Ga_group_01	81.31	412	58	4	1	412	1.28032e+07	1.28036e+07	1e-92	343			breambac-77o9	2	same	89690.8	1	+
breambac-68k12.r	Ga_group_01	78.81	387	72	3	135	512	12812012	12811627	3e-84	315			breambac-68k12	2	same	107006	-1	+
breambac-87h7.f	Ga_group_01	87.37	380	31	6	1	370	1.28183e+07	1.28186e+07	2e-103	378			breambac-87h7	2	same	74622.3	1	+
breambac-119g4.f	Ga_group_01	83.61	415	57	6	294	704	1.28229e+07	1.28232e+07	4e-103	378			breambac-119g4	2	same	77661.4	1	+	MAX	breambac-119g4.f
breambac-68h7.r	Ga_group_01	93.48	322	21	0	25	346	1.28327e+07	1.28324e+07	1e-123	445			breambac-68h7	2	same	90701.2	-1	+
breambac-138i20.r	Ga_group_01	81.68	333	59	2	218	549	1.28334e+07	1.28332e+07	2e-84	316			breambac-138i20	2	same	105804	-1	+
breambac-32h19.f	Ga_group_01	82.12	358	62	2	212	568	12833444	1.28332e+07	1e-93	347			breambac-32h19	2	same	107894	-1	+
breambac-133h5.f	Ga_group_01	79.84	511	83	4	165	666	12833781	1.28343e+07	4e-116	421			breambac-133h5	2	same	56602.9	1	+
breambac-5h21.r	Ga_group_01	68.22	129	41	0	230	358	1.28459e+07	12846005	3e-12	76.1			breambac-5h21	2	same	1.21941e+07	1	+
breambac-86b15.r	Ga_group_01	91.92	99	7	1	6	103	12854341	12854243	5e-25	118			breambac-86b15	2	same	87821	-1	+
breambac-62p10.r	Ga_group_01	93.15	292	18	1	301	592	1.28673e+07	1.2867e+07	1e-106	389			breambac-62p10	2	same	64127.5	-1	+
breambac-66f7.r	Ga_group_01	93.25	252	15	1	337	588	1.28673e+07	1.2867e+07	2e-90	336			breambac-66f7	2	same	64127.5	-1	+
breambac-40b10.r	Ga_group_01	93.03	330	21	1	345	674	1.28673e+07	1.2867e+07	9e-122	440			breambac-40b10	2	same	143340	-1	+		breambac-40b10.r
breambac-88m7.f	Ga_group_01	93.4	591	37	2	1	590	1.28675e+07	1.28681e+07	0	779			breambac-88m7	2	same	79317.4	1	+
breambac-97e22.f	Ga_group_01	93.08	578	38	2	1	577	1.28675e+07	1.2868e+07	0	756			breambac-97e22	2	same	109177	1	+
breambac-11c21.r	Ga_group_01	92.98	570	38	2	1	569	1.28675e+07	1.28681e+07	0	743			breambac-11c21	2	same	138844	1	+
breambac-66h6.f	Ga_group_01	91.2	432	32	2	4	435	1.28849e+07	1.28853e+07	1e-148	529			breambac-66h6	2	same	120701	1	+
breambac-69p1.r	Ga_group_01	93.98	399	17	3	19	417	1.28851e+07	1.28854e+07	2e-143	511			breambac-69p1	2	same	128281	1	+	MAX	breambac-69p1.r
breambac-133h5.r	Ga_group_01	88.82	662	54	5	15	666	1.28904e+07	1.28897e+07	0	724			breambac-133h5	2	same	56602.9	-1	+
breambac-93l6.f	Ga_group_01	78.99	457	77	4	19	458	1.28925e+07	1.28929e+07	1e-95	353			breambac-93l6	2	same	113146	1	+
breambac-87h7.r	Ga_group_01	80.69	642	104	5	50	673	1.28929e+07	1.28923e+07	3e-154	548			breambac-87h7	2	same	74622.3	-1	+
breambac-77o9.f	Ga_group_01	78.69	352	68	3	78	424	1.28929e+07	1.28926e+07	8e-74	280			breambac-77o9	2	same	89690.8	-1	+
breambac-5k1.f	Ga_group_01	88.39	448	47	3	5	450	1.2893e+07	1.28933e+07	4e-144	515			breambac-5k1	2	same	83661	1	+
breambac-97m16.r	Ga_group_01	89.09	385	37	3	1	383	1.2893e+07	1.28933e+07	1e-123	446			breambac-97m16	2	same	77399.8	1	+
breambac-119g4.r	Ga_group_01	84.06	414	52	6	125	524	1.29006e+07	1.29002e+07	2e-99	366			breambac-119g4	2	same	77661.4	-1	+		breambac-119g4.r
breambac-24c21.r	Ga_group_01	86.36	396	43	4	363	753	1.29036e+07	1.29039e+07	3e-112	408			breambac-24c21	2	same	88551.6	1	+
breambac-95f15.f	Ga_group_01	87.3	307	33	3	392	698	1.29036e+07	1.29039e+07	2e-89	332			breambac-95f15	2	same	102684	1	+
breambac-79j21.f	Ga_group_01	83.89	658	83	4	8	642	1.29103e+07	1.29109e+07	0	638			breambac-79j21	2	same	96055.5	1	+
breambac-72n4.f	Ga_group_01	93.6	703	40	4	17	716	1.29162e+07	1.2917e+07	0	914			breambac-72n4	2	same	90096.8	1	+
breambac-27k3.r	Ga_group_01	94.03	854	46	4	3	853	1.29162e+07	1.29171e+07	0	1134			breambac-27k3	2	same	97134.5	1	+
breambac-73c22.r	Ga_group_01	93.43	670	39	4	5	671	1.29162e+07	1.29169e+07	0	865			breambac-73c22	2	same	90117.6	1	+
breambac-68f16.r	Ga_group_01	84.42	642	82	6	55	689	1.29267e+07	1.29272e+07	1e-177	626			breambac-68f16	2	same	49951.4	1	+
breambac-88m7.r	Ga_group_01	86.16	542	53	7	1	530	1.29468e+07	1.29463e+07	2e-144	515			breambac-88m7	2	same	79317.4	-1	+
breambac-97m16.f	Ga_group_01	83.52	91	14	1	421	511	1.29704e+07	1.29703e+07	5e-16	88.8			breambac-97m16	2	same	77399.8	-1	+
breambac-5k1.r	Ga_group_01	91.64	670	50	2	1	670	1.29766e+07	1.29761e+07	0	860			breambac-5k1	2	same	83661	-1	+
breambac-97e22.r	Ga_group_01	91.83	747	54	3	9	754	1.29766e+07	12975930	0	957			breambac-97e22	2	same	109177	-1	+
breambac-68f16.f	Ga_group_01	90	670	64	2	20	688	1.29766e+07	1.29761e+07	0	830			breambac-68f16	2	same	49951.4	-1	+
breambac-24c21.f	Ga_group_01	72.41	145	36	1	463	607	1.29922e+07	1.29921e+07	2e-16	90.3			breambac-24c21	2	same	88551.6	-1	+
breambac-93l6.r	Ga_group_01	88.5	113	11	1	379	489	1.30056e+07	1.30056e+07	9e-28	128			breambac-93l6	2	same	113146	-1	+
breambac-66h6.r	Ga_group_01	87.61	113	12	1	391	501	1.30056e+07	1.30056e+07	2e-27	126			breambac-66h6	2	same	120701	-1	+
breambac-79j21.r	Ga_group_01	79.94	309	44	8	25	326	1.30063e+07	1.30061e+07	9e-48	194			breambac-79j21	2	same	96055.5	-1	+
breambac-95f15.r	Ga_group_01	81.88	309	39	7	26	328	1.30063e+07	1.30061e+07	2e-56	223			breambac-95f15	2	same	102684	-1	+
breambac-72n4.r	Ga_group_01	81.85	314	41	7	2	309	1.30063e+07	1.30061e+07	3e-58	229			breambac-72n4	2	same	90096.8	-1	+
breambac-73c22.f	Ga_group_01	81.02	353	49	8	4	349	1.30064e+07	1.30061e+07	1e-60	237			breambac-73c22	2	same	90117.6	-1	+
breambac-11c21.f	Ga_group_01	81.53	379	52	8	32	403	1.30064e+07	1.30061e+07	2e-70	269			breambac-11c21	2	same	138844	-1	+
breambac-137i5.f	Ga_group_01	87.88	652	70	4	31	674	1.30064e+07	1.3007e+07	0	706			breambac-137i5	2	same	91285.6	1	+	MAX	breambac-137i5.f
breambac-42f4.f	Ga_group_01	87.21	735	84	5	3	729	1.30064e+07	1.30071e+07	0	779			breambac-42f4	2	same	75950.2	1	+
breambac-27k3.f	Ga_group_01	91.53	673	52	4	3	675	13013373	1.30127e+07	0	838			breambac-27k3	2	same	97134.5	-1	+
breambac-69p1.f	Ga_group_01	90.6	564	50	3	3	566	13013373	1.30128e+07	0	698			breambac-69p1	2	same	128281	-1	+		breambac-69p1.f
breambac-42f4.r	Ga_group_01	72.4	279	60	7	2	274	1.30824e+07	1.30822e+07	2e-24	117			breambac-42f4	2	same	75950.2	-1	+
breambac-137i5.r	Ga_group_01	87.12	699	76	7	239	927	1.30977e+07	1.30971e+07	0	746			breambac-137i5	2	same	91285.6	-1	+	Contig End	breambac-137i5.r
breambac-27m13.f	Ga_group_01	75.74	136	31	2	1	135	1.31069e+07	1.3107e+07	3e-17	93.5			breambac-27m13	2	same	64797.5	1	+	Contig Start	breambac-27m13.f
breambac-85p9.f	Ga_group_01	77.46	71	16	0	312	382	1.31628e+07	1.31629e+07	3e-08	63.4			breambac-85p9	2	same	5.7594e+06	1	-
breambac-27m13.r	Ga_group_01	82.74	481	83	0	17	497	1.31717e+07	1.31713e+07	9e-140	500			breambac-27m13	2	same	64797.5	-1	+	Contig End	breambac-27m13.r
breambac-131h2.f	Ga_group_01	80.8	427	72	2	196	612	1.32176e+07	1.3218e+07	1e-105	386			breambac-131h2	2	same	78004.2	1	+	Contig Start	breambac-131h2.f
breambac-119j9.r	Ga_group_01	83.94	411	59	5	199	609	13239492	1.32399e+07	2e-107	393			breambac-119j9	2	same	55692.2	1	+
breambac-100f19.f	Ga_group_01	84.72	373	51	4	218	590	13239492	1.32399e+07	7e-101	370			breambac-100f19	2	same	60205.3	1	+
breambac-108c20.r	Ga_group_01	83.94	411	59	5	183	593	13239492	1.32399e+07	2e-107	393			breambac-108c20	2	same	60236.8	1	+
breambac-55m20.r	Ga_group_01	77.22	395	66	8	209	586	1.32781e+07	1.32784e+07	1e-61	240			breambac-55m20	2	same	75412.1	1	+	MAX	breambac-55m20.r
breambac-99b11.f	Ga_group_01	85.99	157	20	1	551	707	1.32822e+07	1.32823e+07	3e-40	169			breambac-99b11	2	same	64768.2	1	+
breambac-63o6.f	Ga_group_01	84.8	204	27	3	550	751	1.32822e+07	1.32824e+07	3e-48	196			breambac-63o6	2	same	71288.8	1	+
breambac-117h20.f	Ga_group_01	86.61	224	26	2	2	221	1.32834e+07	1.32835e+07	3e-61	239			breambac-117h20	2	same	70101.5	1	+
breambac-119j9.f	Ga_group_01	72.84	394	79	5	53	439	1.32952e+07	1.32949e+07	7e-58	228			breambac-119j9	2	same	55692.2	-1	+
breambac-131h2.r	Ga_group_01	80.15	136	27	0	566	701	1.32956e+07	1.32955e+07	9e-29	131			breambac-131h2	2	same	78004.2	-1	+		breambac-131h2.r
breambac-100f19.r	Ga_group_01	83.33	102	11	1	1	102	1.32997e+07	1.32996e+07	4e-17	91.9			breambac-100f19	2	same	60205.3	-1	+
breambac-108c20.f	Ga_group_01	84.72	144	15	1	1	144	1.32997e+07	1.32996e+07	1e-31	141			breambac-108c20	2	same	60236.8	-1	+
breambac-28p1.r	Ga_group_01	60.18	113	43	1	269	381	1.33084e+07	1.33085e+07	1e-05	53.9			breambac-28p1	2	same	82479	1	+	MAX	breambac-28p1.r
breambac-133a18.r	Ga_group_01	81.44	97	18	0	586	682	1.3312e+07	1.33121e+07	1e-18	98.3			breambac-133a18	2	same	71361.2	1	+
breambac-99b11.r	Ga_group_01	82.97	370	58	3	1	369	1.33469e+07	1.33465e+07	2e-96	356			breambac-99b11	2	same	64768.2	-1	+
breambac-117h20.r	Ga_group_01	82.25	445	65	7	120	551	1.33535e+07	1.33531e+07	6e-90	334			breambac-117h20	2	same	70101.5	-1	+
breambac-63o6.r	Ga_group_01	85.09	389	52	6	146	529	1.33535e+07	1.33531e+07	6e-89	331			breambac-63o6	2	same	71288.8	-1	+
breambac-55m20.f	Ga_group_01	83.67	447	59	7	274	707	13353470	1.33531e+07	9e-91	337			breambac-55m20	2	same	75412.1	-1	+		breambac-55m20.f
breambac-68c9.r	Ga_group_01	88.2	322	29	4	13	328	1.33538e+07	1.33541e+07	4e-93	345			breambac-68c9	2	same	80254.8	1	+
breambac-46n17.f	Ga_group_01	75.29	170	40	1	139	308	1.33716e+07	1.33717e+07	3e-27	126			breambac-46n17	2	same	69996.2	1	+
breambac-133a18.f	Ga_group_01	80.05	401	70	2	313	703	1.33834e+07	1.3383e+07	5e-95	351			breambac-133a18	2	same	71361.2	-1	+
breambac-100m8.r	Ga_group_01	84.67	274	40	1	400	671	1.3388e+07	1.33883e+07	6e-77	291			breambac-100m8	2	same	73366.6	1	+
breambac-75n14.f	Ga_group_01	85.19	135	15	2	1	132	1.33898e+07	1.33899e+07	5e-28	128			breambac-75n14	2	same	73075.4	1	+	MAX	breambac-75n14.f
breambac-28p1.f	Ga_group_01	77.31	238	37	4	361	581	1.33909e+07	1.33907e+07	2e-34	150			breambac-28p1	2	same	82479	-1	+		breambac-28p1.f
breambac-132a24.r	Ga_group_01	83.15	89	14	1	19	107	1.33984e+07	1.33985e+07	5e-15	85.6			breambac-132a24	2	same	86893.5	1	+
breambac-27j18.f	Ga_group_01	85.2	615	72	8	16	622	1.34032e+07	1.34037e+07	4e-168	594			breambac-27j18	2	same	59609.8	1	+
breambac-105l1.f	Ga_group_01	80.48	461	69	8	1	454	1.34078e+07	1.34082e+07	3e-94	348			breambac-105l1	2	same	55030	1	+
breambac-68c9.f	Ga_group_01	85.96	641	76	4	1	631	13434080	1.34336e+07	0	660			breambac-68c9	2	same	80254.8	-1	+
breambac-144d4.f	Ga_group_01	80.31	325	57	3	336	656	1.34344e+07	1.34349e+07	4e-73	278			breambac-144d4	2	same	83476.7	1	+	MAX	breambac-144d4.f
breambac-46n17.r	Ga_group_01	71.86	199	54	1	499	697	1.34416e+07	1.34414e+07	1e-30	137			breambac-46n17	2	same	69996.2	-1	+
breambac-100m8.f	Ga_group_01	79.69	389	68	3	223	610	1.34614e+07	13461081	2e-87	326			breambac-100m8	2	same	73366.6	-1	+
breambac-105l1.r	Ga_group_01	81.46	383	47	4	1	361	1.34628e+07	1.34625e+07	8e-84	313			breambac-105l1	2	same	55030	-1	+
breambac-27j18.r	Ga_group_01	79.85	392	55	4	5	374	1.34628e+07	1.34625e+07	3e-80	302			breambac-27j18	2	same	59609.8	-1	+
breambac-75n14.r	Ga_group_01	80.36	392	53	4	1	370	1.34628e+07	1.34625e+07	3e-82	309			breambac-75n14	2	same	73075.4	-1	+		breambac-75n14.r
breambac-82l18.f	Ga_group_01	82.66	421	58	7	6	419	1.34629e+07	1.34632e+07	5e-97	358			breambac-82l18	2	same	62964.2	1	+	MAX	breambac-82l18.f
breambac-132a24.f	Ga_group_01	76.87	415	65	8	19	421	1.34853e+07	13484977	3e-62	242			breambac-132a24	2	same	86893.5	-1	+
breambac-144d4.r	Ga_group_01	75.38	329	59	4	78	388	1.35178e+07	1.35176e+07	3e-49	199			breambac-144d4	2	same	83476.7	-1	+		breambac-144d4.r
breambac-82l18.r	Ga_group_01	88.53	532	40	4	6	518	1.35258e+07	1.35254e+07	1e-165	586			breambac-82l18	2	same	62964.2	-1	+	Contig End	breambac-82l18.r
breambac-111d5.f	Ga_group_01	81.07	412	61	5	321	728	1.35379e+07	1.35382e+07	1e-91	340			breambac-111d5	2	same	68295.5	1	+	Contig Start	breambac-111d5.f
breambac-140i10.f	Ga_group_01	86.87	434	51	3	131	560	1.35401e+07	1.35405e+07	4e-126	454			breambac-140i10	2	same	70160.8	1	+
breambac-140k2.f	Ga_group_01	86.87	434	51	3	131	560	1.35401e+07	1.35405e+07	4e-126	454			breambac-140k2	2	same	70160.8	1	+
breambac-71o19.r	Ga_group_01	89.41	321	31	2	41	361	1.35529e+07	1.35531e+07	1e-108	396			breambac-71o19	2	same	95037.5	1	+
breambac-125a15.r	Ga_group_01	85.25	549	65	4	13	547	1.3559e+07	1.35594e+07	2e-151	538			breambac-125a15	2	same	101392	1	+	MAX	breambac-125a15.r
breambac-111d5.r	Ga_group_01	78.73	409	69	8	341	743	1.36062e+07	1.36059e+07	9e-69	264			breambac-111d5	2	same	68295.5	-1	+		breambac-111d5.r
breambac-140i10.r	Ga_group_01	81.02	374	65	4	357	725	1.36102e+07	1.36099e+07	8e-90	334			breambac-140i10	2	same	70160.8	-1	+
breambac-140k2.r	Ga_group_01	79.46	336	63	4	362	692	1.36102e+07	1.36099e+07	1e-73	280			breambac-140k2	2	same	70160.8	-1	+
breambac-131j2.r	Ga_group_01	84.51	368	49	4	1	366	1.36268e+07	1.36272e+07	2e-97	359			breambac-131j2	2	same	62566.5	1	+
breambac-71o19.f	Ga_group_01	82.28	158	25	2	506	660	1.36479e+07	1.36478e+07	4e-32	142			breambac-71o19	2	same	95037.5	-1	+
breambac-136k13.r	Ga_group_01	88.05	410	49	0	1	410	1.36596e+07	1.36599e+07	2e-138	496			breambac-136k13	2	same	77177.2	1	+	MAX	breambac-136k13.r
breambac-125a15.f	Ga_group_01	74.57	232	44	4	269	493	1.36604e+07	1.36602e+07	2e-27	126			breambac-125a15	2	same	101392	-1	+		breambac-125a15.f
breambac-131j2.f	Ga_group_01	78.15	691	115	12	2	677	1.36894e+07	1.36888e+07	2e-129	465			breambac-131j2	2	same	62566.5	-1	+
breambac-108l5.r	Ga_group_01	87.5	328	39	2	103	429	1.36983e+07	13698520	2e-101	372			breambac-108l5	2	same	91681.8	1	+	MAX	breambac-108l5.r
breambac-136k13.f	Ga_group_01	73.41	361	81	4	98	447	1.37367e+07	1.37365e+07	2e-53	213			breambac-136k13	2	same	77177.2	-1	+		breambac-136k13.f
breambac-88a16.r	Ga_group_01	67.43	218	61	3	145	354	1.37398e+07	1.374e+07	5e-14	82.4			breambac-88a16	2	same	66213	1	+
breambac-124d15.f	Ga_group_01	74.19	744	141	14	44	756	1.375e+07	1.37506e+07	5e-105	385			breambac-124d15	2	same	90120.9	1	+
breambac-143l13.f	Ga_group_01	89.54	411	42	1	1	410	13785711	1.37861e+07	5e-142	507			breambac-143l13	2	same	79431.2	1	+	MAX	breambac-143l13.f
breambac-108l5.f	Ga_group_01	89.79	431	38	1	1	425	13789951	1.37895e+07	1e-130	469			breambac-108l5	2	same	91681.8	-1	+		breambac-108l5.f
breambac-123e24.r	Ga_group_01	79.31	58	12	0	21	78	1.38024e+07	1.38025e+07	8e-06	55.5			breambac-123e24	2	same	79760.7	1	+
breambac-88a16.f	Ga_group_01	78.12	329	52	6	4	317	1.3806e+07	1.38058e+07	3e-54	215			breambac-88a16	2	same	66213	-1	+
breambac-52n11.f	Ga_group_01	89.67	552	47	5	1	547	1.38145e+07	1.3815e+07	9e-175	616			breambac-52n11	2	same	956760	1	-
breambac-74b13.r	Ga_group_01	78.1	694	124	9	2	676	1.38209e+07	1.38216e+07	7e-141	504			breambac-74b13	2	same	75260.9	1	+
breambac-124d15.r	Ga_group_01	86.27	386	52	1	111	495	1.38401e+07	1.38398e+07	3e-120	435			breambac-124d15	2	same	90120.9	-1	+
breambac-15b17.r	Ga_group_01	86.84	228	30	0	413	640	1.38525e+07	1.38526e+07	2e-68	263			breambac-15b17	2	same	83621.7	1	+
breambac-8k9.r	Ga_group_01	76.08	372	81	3	413	783	1.38525e+07	1.38527e+07	3e-70	269			breambac-8k9	2	same	88896.5	1	+	MAX	breambac-8k9.r
breambac-143l13.r	Ga_group_01	91.09	202	18	0	596	797	1.38651e+07	1.3865e+07	9e-69	264			breambac-143l13	2	same	79431.2	-1	+		breambac-143l13.r
breambac-109g14.r	Ga_group_01	88	50	6	0	357	406	1.38794e+07	1.38794e+07	8e-08	61.8			breambac-109g14	2	same	71932.9	1	+
breambac-123e24.f	Ga_group_01	84.75	118	18	0	280	397	1.38822e+07	1.38821e+07	9e-29	131			breambac-123e24	2	same	79760.7	-1	+
breambac-2h2.r	Ga_group_01	81.25	384	58	4	129	512	1.38954e+07	1.38957e+07	1e-85	320			breambac-2h2	2	same	84708.6	1	+
breambac-74b13.f	Ga_group_01	86.89	656	56	8	2	654	1.38962e+07	1.38956e+07	0	662			breambac-74b13	2	same	75260.9	-1	+
breambac-15b17.f	Ga_group_01	85.92	71	10	0	6	76	1.39361e+07	1.3936e+07	5e-14	82.4			breambac-15b17	2	same	83621.7	-1	+
breambac-41m13.r	Ga_group_01	90.31	423	27	4	1	421	1.39361e+07	1.39365e+07	5e-131	470			breambac-41m13	2	same	83249.8	1	+	MAX	breambac-41m13.r
breambac-8k9.f	Ga_group_01	76.58	491	78	10	1	469	1.39413e+07	1.3941e+07	4e-72	275			breambac-8k9	2	same	88896.5	-1	+		breambac-8k9.f
breambac-122k22.r	Ga_group_01	89.36	47	5	0	641	687	13946220	13946266	3e-07	60.2			breambac-122k22	2	same	72388	1	+
breambac-128p14.r	Ga_group_01	89.74	39	4	0	659	697	13946220	13946258	0.0002	50.7			breambac-128p14	2	same	91642	1	+
breambac-109g14.f	Ga_group_01	81.16	467	76	3	2	460	1.39513e+07	1.39509e+07	1e-115	420			breambac-109g14	2	same	71932.9	-1	+
breambac-2h2.f	Ga_group_01	80.34	351	57	3	1	340	1.39801e+07	1.39798e+07	1e-75	286			breambac-2h2	2	same	84708.6	-1	+
breambac-115f1.r	Ga_group_01	90.53	665	60	2	2	665	13980170	1.39808e+07	0	835			breambac-115f1	2	same	70216.6	1	+
breambac-86g21.f	Ga_group_01	84.95	558	65	7	56	599	1.39889e+07	1.39893e+07	4e-147	524			breambac-86g21	2	same	63579.2	1	+
breambac-43a10.f	Ga_group_01	84.44	707	85	9	39	729	1.40082e+07	1.40088e+07	0	648			breambac-43a10	2	same	80473.4	1	+	MAX	breambac-43a10.f
breambac-122k22.f	Ga_group_01	67.5	200	56	3	1	191	14018608	14018409	1e-11	74.5			breambac-122k22	2	same	72388	-1	+
breambac-41m13.f	Ga_group_01	82.54	315	39	2	210	508	1.40194e+07	14019121	5e-75	285			breambac-41m13	2	same	83249.8	-1	+		breambac-41m13.f
breambac-108l7.r	Ga_group_01	88.63	642	57	5	2	630	1.40339e+07	1.40344e+07	0	722			breambac-108l7	2	same	97946.9	1	+
breambac-128p14.f	Ga_group_01	82.72	573	81	3	75	643	14037862	14037304	2e-153	545			breambac-128p14	2	same	91642	-1	+
breambac-115f1.f	Ga_group_01	85.49	572	71	5	1	570	1.40504e+07	1.40498e+07	9e-166	586			breambac-115f1	2	same	70216.6	-1	+
breambac-86g21.r	Ga_group_01	86.78	295	33	3	1	295	1.40525e+07	1.40522e+07	4e-83	312			breambac-86g21	2	same	63579.2	-1	+
breambac-45c4.f	Ga_group_01	83.04	743	85	11	11	714	1.40578e+07	1.40584e+07	4e-178	627			breambac-45c4	2	same	121784	1	+	MAX	breambac-45c4.f
breambac-142p5.f	Ga_group_01	77.45	102	22	1	419	520	1.4088e+07	1.40881e+07	2e-13	80.8	3		breambac-142p5	2	same	1.05833e+07	1	-
breambac-24b21.r	Ga_group_01	77.45	102	22	1	419	520	1.4088e+07	1.40881e+07	2e-13	80.8	3		breambac-24b21	2	same	1.05847e+07	1	-
breambac-16a4.r	Ga_group_01	77.45	102	22	1	419	520	1.4088e+07	1.40881e+07	2e-13	80.8	3		breambac-16a4	2	same	1.06098e+07	1	-
breambac-43a10.r	Ga_group_01	87.78	401	48	1	11	410	1.40887e+07	1.40884e+07	3e-131	472			breambac-43a10	2	same	80473.4	-1	+		breambac-43a10.r
breambac-33h17.f	Ga_group_01	91.61	155	9	2	3	157	1.40958e+07	1.40959e+07	2e-44	183			breambac-33h17	2	same	87720.4	1	+
breambac-92h6.r	Ga_group_01	87.55	466	45	2	6	462	14102728	1.41032e+07	1e-145	519			breambac-92h6	2	same	59667.1	1	+
breambac-21p17.r	Ga_group_01	87.8	41	5	0	450	490	1.41089e+07	1.41089e+07	0.0002	50.7			breambac-21p17	2	same	8.72968e+06	-1	+
breambac-113g8.r	Ga_group_01	86.35	359	42	4	51	408	1.41106e+07	1.41109e+07	7e-99	364			breambac-113g8	2	same	69000.2	1	+
breambac-108l7.f	Ga_group_01	89.71	175	17	1	397	571	1.41318e+07	1.41316e+07	4e-53	212			breambac-108l7	2	same	97946.9	-1	+
breambac-125l11.f	Ga_group_01	72.34	94	26	0	384	477	1.41436e+07	1.41437e+07	1e-09	68.2			breambac-125l11	2	same	1.19503e+07	1	+
breambac-92h6.f	Ga_group_01	90.48	441	40	2	1	439	1.41624e+07	1.4162e+07	3e-154	548			breambac-92h6	2	same	59667.1	-1	+
breambac-43b8.f	Ga_group_01	73.06	438	93	9	338	752	1.41637e+07	1.41648e+07	5e-53	212			breambac-43b8	2	same	19280.9	1	+
breambac-126c12.f	Ga_group_01	66.47	340	92	7	334	653	1.41637e+07	1.41647e+07	3e-19	99.9			breambac-126c12	2	same	81664.1	1	+	MAX	breambac-126c12.f
breambac-45c4.r	Ga_group_01	77	200	38	3	1	199	1.41795e+07	1.41794e+07	1e-28	131			breambac-45c4	2	same	121784	-1	+		breambac-45c4.r
breambac-113g8.f	Ga_group_01	75.66	226	48	2	5	230	1.41796e+07	1.41794e+07	2e-35	153			breambac-113g8	2	same	69000.2	-1	+
breambac-43b8.r	Ga_group_01	69.07	97	29	1	658	754	1.4183e+07	1.41829e+07	4e-09	66.6			breambac-43b8	2	same	19280.9	-1	+
breambac-33h17.r	Ga_group_01	77.67	309	62	1	4	312	1.41835e+07	1.41833e+07	2e-65	253			breambac-33h17	2	same	87720.4	-1	+
breambac-108b3.f	Ga_group_01	76.07	163	35	2	1	159	1.41947e+07	14194858	2e-23	114			breambac-108b3	2	same	78678.4	1	+
breambac-40n5.f	Ga_group_01	80.58	103	12	1	195	289	1.41951e+07	1.41951e+07	2e-13	80.8			breambac-40n5	2	same	66453.8	1	+
breambac-89i14.r	Ga_group_01	80.58	103	12	1	211	305	1.41951e+07	1.41951e+07	2e-13	80.8			breambac-89i14	2	same	93325.2	1	+
breambac-78e17.r	Ga_group_01	81.16	207	26	2	83	288	1.4215e+07	1.42151e+07	3e-40	169			breambac-78e17	2	same	124091	1	+	MAX	breambac-78e17.r
breambac-77j7.r	Ga_group_01	66.67	105	35	0	73	177	1.42292e+07	1.42292e+07	2e-06	57.1			breambac-77j7	2	same	73537.7	1	+
breambac-126c12.r	Ga_group_01	89.6	500	35	3	28	527	1.42454e+07	1.42449e+07	3e-163	578			breambac-126c12	2	same	81664.1	-1	+		breambac-126c12.r
breambac-28h21.f	Ga_group_01	82.25	355	39	3	27	369	1.42523e+07	1.42527e+07	2e-80	302			breambac-28h21	2	same	75115.8	1	+
breambac-65g22.r	Ga_group_01	86.71	414	47	4	26	432	1.42538e+07	1.42542e+07	5e-121	437			breambac-65g22	2	same	63364.8	1	+
breambac-40n5.r	Ga_group_01	80.93	215	33	3	3	216	1.42615e+07	1.42613e+07	5e-42	175			breambac-40n5	2	same	66453.8	-1	+
breambac-108b3.r	Ga_group_01	77.14	245	51	3	13	252	1.42734e+07	1.42732e+07	1e-43	180			breambac-108b3	2	same	78678.4	-1	+
breambac-89i14.f	Ga_group_01	81.52	276	34	3	24	284	1.42884e+07	1.42882e+07	2e-57	226			breambac-89i14	2	same	93325.2	-1	+
breambac-56b14.f	Ga_group_01	83.02	265	41	3	91	352	1.43003e+07	14300457	4e-64	248			breambac-56b14	2	same	9328.62	1	+
breambac-102f11.f	Ga_group_01	81.94	299	44	4	330	623	1.43012e+07	14301485	2e-66	256			breambac-102f11	2	same	108553	1	+
breambac-77j7.f	Ga_group_01	82.4	267	32	2	44	295	14302703	1.43024e+07	2e-60	236			breambac-77j7	2	same	73537.7	-1	+
breambac-56b14.r	Ga_group_01	79.73	365	67	4	398	761	1.43096e+07	1.43093e+07	3e-79	299			breambac-56b14	2	same	9328.62	-1	+
breambac-65g22.f	Ga_group_01	78.7	169	27	3	409	569	1.43172e+07	1.4317e+07	2e-24	117			breambac-65g22	2	same	63364.8	-1	+
breambac-28h21.r	Ga_group_01	82.02	267	46	2	344	610	1.43275e+07	1.43273e+07	4e-63	245			breambac-28h21	2	same	75115.8	-1	+
breambac-61l9.f	Ga_group_01	78.71	202	33	2	309	510	1.43375e+07	1.43377e+07	2e-35	153			breambac-61l9	2	same	72420.7	1	+	MAX	breambac-61l9.f
breambac-78e17.f	Ga_group_01	76.62	77	17	1	237	313	1.43391e+07	1.4339e+07	2e-06	57.1			breambac-78e17	2	same	124091	-1	+		breambac-78e17.f
breambac-50b2.f	Ga_group_01	83.22	566	79	4	1	552	1.43778e+07	1.43782e+07	6e-139	497			breambac-50b2	2	same	136862	1	+	MAX	breambac-50b2.f
breambac-85b6.r	Ga_group_01	89.33	356	36	1	20	375	1.43896e+07	1.439e+07	2e-110	402			breambac-85b6	2	same	83468.3	1	+
breambac-89h21.r	Ga_group_01	77.61	527	93	8	3	509	1.44059e+07	1.44064e+07	2e-97	359			breambac-89h21	2	same	41742.9	1	+
breambac-102f11.r	Ga_group_01	78.34	337	56	4	2	322	1.44098e+07	1.44095e+07	3e-63	245			breambac-102f11	2	same	108553	-1	+
breambac-61l9.r	Ga_group_01	77.71	507	84	8	133	622	14409963	1.44096e+07	8e-91	337			breambac-61l9	2	same	72420.7	-1	+		breambac-61l9.r
breambac-89h21.f	Ga_group_01	92.2	295	20	1	214	505	1.44477e+07	1.44474e+07	2e-101	372			breambac-89h21	2	same	41742.9	-1	+
breambac-85b6.f	Ga_group_01	77	426	84	6	168	585	1.44731e+07	1.44727e+07	6e-77	291			breambac-85b6	2	same	83468.3	-1	+
breambac-65b23.f	Ga_group_01	79.67	182	28	2	490	662	1.44887e+07	1.44888e+07	4e-32	142			breambac-65b23	2	same	72325.8	1	+
breambac-96e3.f	Ga_group_01	80.37	326	61	2	145	470	1.44976e+07	1.44978e+07	6e-78	294			breambac-96e3	2	same	69105.7	1	+	MAX	breambac-96e3.f
breambac-50b2.r	Ga_group_01	80.47	297	50	4	1	295	1.45146e+07	1.45144e+07	3e-58	229			breambac-50b2	2	same	136862	-1	+		breambac-50b2.r
breambac-65b23.r	Ga_group_01	82.99	147	22	2	17	160	1.4561e+07	1.45609e+07	9e-30	134			breambac-65b23	2	same	72325.8	-1	+
breambac-38c23.f	Ga_group_01	78.86	473	76	6	16	469	1.45611e+07	1.45605e+07	4e-94	348			breambac-38c23	2	same	85747.8	-1	-
breambac-96e3.r	Ga_group_01	77.54	414	65	8	5	410	1.45667e+07	1.45664e+07	6e-66	255			breambac-96e3	2	same	69105.7	-1	+	Contig End	breambac-96e3.r
breambac-115h6.f	Ga_group_01	79.04	353	67	2	197	549	14608937	1.46092e+07	2e-79	299			breambac-115h6	2	same	68595.2	1	+	Contig Start	breambac-115h6.f
breambac-39f23.f	Ga_group_01	77.99	468	86	5	197	654	14608937	1.46093e+07	4e-95	351			breambac-39f23	2	same	68607.5	1	+
breambac-50p10.f	Ga_group_01	78.59	481	85	6	183	652	14608937	1.46093e+07	6e-98	361			breambac-50p10	2	same	78792.3	1	+
breambac-43d12.r	Ga_group_01	88.02	768	80	8	1	763	1.46424e+07	1.46432e+07	0	844			breambac-43d12	2	same	95893.2	1	+
breambac-38c23.r	Ga_group_01	91.28	642	45	4	1	635	1.46462e+07	1.46456e+07	0	792			breambac-38c23	2	same	85747.8	-1	-
breambac-60k18.r	Ga_group_01	86.94	337	42	2	1	335	1.46463e+07	1.46466e+07	8e-103	377			breambac-60k18	2	same	119734	1	+	MAX	breambac-60k18.r
breambac-131f22.f	Ga_group_01	92.38	630	48	0	75	704	1.46773e+07	1.46778e+07	0	847			breambac-131f22	2	same	74848.2	1	+
breambac-74h8.r	Ga_group_01	91.25	617	54	0	41	657	1.46773e+07	1.46778e+07	0	809			breambac-74h8	2	same	87478.2	1	+
breambac-115h6.r	Ga_group_01	87.19	242	30	1	1	241	1.46775e+07	1.46773e+07	5e-73	277			breambac-115h6	2	same	68595.2	-1	+		breambac-115h6.r
breambac-39f23.r	Ga_group_01	94.19	258	15	0	1	258	1.46775e+07	1.46773e+07	2e-98	362			breambac-39f23	2	same	68607.5	-1	+
breambac-93h20.r	Ga_group_01	91.65	683	57	0	1	683	1.46776e+07	1.46787e+07	0	903			breambac-93h20	2	same	87240.5	1	+
breambac-121d7.r	Ga_group_01	87.96	656	49	8	1	655	1.46852e+07	1.46859e+07	0	662			breambac-121d7	2	same	66463.7	1	+
breambac-50p10.r	Ga_group_01	90.33	517	48	2	5	520	1.46877e+07	1.46872e+07	0	643			breambac-50p10	2	same	78792.3	-1	+
breambac-142m12.f	Ga_group_01	76.65	471	86	8	1	464	1.46878e+07	1.46882e+07	7e-79	297			breambac-142m12	2	same	76985.7	1	+
breambac-126h13.f	Ga_group_01	79.44	535	83	8	202	721	1.46882e+07	1.46885e+07	9e-101	370			breambac-126h13	2	same	76558.8	1	+
breambac-32i10.f	Ga_group_01	82.23	349	49	3	24	360	1.46893e+07	1.46895e+07	1e-83	313			breambac-32i10	2	same	75537.9	1	+
breambac-44k18.f	Ga_group_01	75.7	214	37	3	1	203	1.46953e+07	1.46955e+07	8e-28	128			breambac-44k18	2	same	108273	1	+
breambac-121m13.r	Ga_group_01	85.54	671	66	5	1	658	1.46978e+07	14698401	0	670			breambac-121m13	2	same	79523.2	1	+
breambac-95p9.r	Ga_group_01	85.42	679	68	5	1	666	1.46978e+07	1.46984e+07	0	675			breambac-95p9	2	same	79945.9	1	+
breambac-19n9.f	Ga_group_01	82.41	108	16	1	334	438	1.47376e+07	1.47377e+07	2e-19	99.9			breambac-19n9	2	same	72027.4	1	+
breambac-43d12.f	Ga_group_01	92.15	191	15	0	1	191	1.47383e+07	1.47381e+07	2e-66	256			breambac-43d12	2	same	95893.2	-1	+
breambac-121d7.f	Ga_group_01	93.45	336	20	2	1	335	1.47517e+07	1.47514e+07	7e-120	434			breambac-121d7	2	same	66463.7	-1	+
breambac-131f22.r	Ga_group_01	93.44	518	29	3	1	517	1.47522e+07	1.47514e+07	0	672			breambac-131f22	2	same	74848.2	-1	+
breambac-32i10.r	Ga_group_01	83.6	494	62	5	1	489	1.47648e+07	1.47644e+07	5e-127	458			breambac-32i10	2	same	75537.9	-1	+
breambac-142m12.r	Ga_group_01	83.7	497	62	5	1	492	1.47648e+07	1.47644e+07	2e-128	462			breambac-142m12	2	same	76985.7	-1	+
breambac-126h13.r	Ga_group_01	83.83	507	62	6	1	501	1.47648e+07	1.47644e+07	2e-129	465			breambac-126h13	2	same	76558.8	-1	+
breambac-74h8.f	Ga_group_01	83.36	529	69	5	1	524	14764825	1.47644e+07	4e-137	491			breambac-74h8	2	same	87478.2	-1	+
breambac-93h20.f	Ga_group_01	94.51	346	18	1	1	346	1.47648e+07	1.47645e+07	6e-134	480			breambac-93h20	2	same	87240.5	-1	+
breambac-100d7.r	Ga_group_01	89.04	575	55	4	70	643	1.47655e+07	1.4766e+07	0	651			breambac-100d7	2	same	88874.8	1	+	MAX	breambac-100d7.r
breambac-60k18.f	Ga_group_01	84.81	698	83	9	10	702	1.4766e+07	1.47654e+07	0	648			breambac-60k18	2	same	119734	-1	+		breambac-60k18.f
breambac-52n11.r	Ga_group_01	80.39	51	10	0	634	684	1.47712e+07	1.47712e+07	0.0002	50.7			breambac-52n11	2	same	956760	1	-
breambac-121m13.f	Ga_group_01	92.72	206	14	1	424	628	1.47773e+07	1.47771e+07	1e-70	271			breambac-121m13	2	same	79523.2	-1	+
breambac-95p9.f	Ga_group_01	78.38	259	49	4	6	260	14777759	1.47775e+07	3e-43	179			breambac-95p9	2	same	79945.9	-1	+
breambac-135g5.r	Ga_group_01	80.95	252	29	3	120	362	1.47779e+07	1.47781e+07	7e-48	194			breambac-135g5	2	same	77704.2	1	+
breambac-12g18.r	Ga_group_01	89.54	153	15	1	337	489	1.47813e+07	14781458	1e-44	183			breambac-12g18	2	same	84686.7	1	+
breambac-137i21.f	Ga_group_01	91.5	153	12	1	362	514	1.47813e+07	14781458	2e-47	193			breambac-137i21	2	same	106621	1	+
breambac-44k18.r	Ga_group_01	85.61	702	85	3	14	702	1.48036e+07	1.48029e+07	0	744			breambac-44k18	2	same	108273	-1	+
breambac-19n9.r	Ga_group_01	78.4	449	91	6	205	650	1.48096e+07	14809285	4e-94	348			breambac-19n9	2	same	72027.4	-1	+
breambac-136c1.f	Ga_group_01	73.31	326	73	4	69	391	1.48192e+07	14819419	2e-43	180			breambac-136c1	2	same	71372	1	+
breambac-11h13.f	Ga_group_01	91.14	429	35	3	91	518	1.4834e+07	1.48344e+07	1e-147	526			breambac-11h13	2	same	74318.9	1	+	MAX	breambac-11h13.f
breambac-100d7.f	Ga_group_01	87.5	128	13	2	345	472	14854397	1.48543e+07	3e-29	133			breambac-100d7	2	same	88874.8	-1	+		breambac-100d7.f
breambac-135g5.f	Ga_group_01	88.37	645	66	3	1	639	1.48556e+07	1.48552e+07	0	748			breambac-135g5	2	same	77704.2	-1	+
breambac-63d2.f	Ga_group_01	77.9	181	29	4	35	208	1.4865e+07	1.48652e+07	4e-23	112			breambac-63d2	2	same	73706.7	1	+
breambac-12g18.f	Ga_group_01	84.71	170	22	3	330	499	14866002	1.48659e+07	5e-37	158			breambac-12g18	2	same	84686.7	-1	+
breambac-105g2.r	Ga_group_01	76.76	142	33	0	157	298	1.48686e+07	14868774	9e-27	123			breambac-105g2	2	same	84354.8	1	+
breambac-137i21.r	Ga_group_01	83.08	467	60	4	3	462	1.48879e+07	1.48875e+07	2e-118	429			breambac-137i21	2	same	106621	-1	+
breambac-112e11.f	Ga_group_01	80.5	359	51	4	270	620	1.48883e+07	1.48895e+07	2e-75	286			breambac-112e11	2	same	61514	1	+
breambac-136c1.r	Ga_group_01	94.56	607	26	5	5	610	1.48905e+07	1.489e+07	0	800			breambac-136c1	2	same	71372	-1	+
breambac-60m24.f	Ga_group_01	82.8	186	29	3	12	197	1.48906e+07	1.48907e+07	2e-39	166			breambac-60m24	2	same	73301.5	1	+	MAX	breambac-60m24.f
breambac-11h13.r	Ga_group_01	80.34	712	126	11	1	709	1.49083e+07	1.49075e+07	2e-160	569			breambac-11h13	2	same	74318.9	-1	+		breambac-11h13.r
breambac-127g7.r	Ga_group_01	79.7	527	82	9	163	685	1.49085e+07	1.4909e+07	1e-105	386			breambac-127g7	2	same	65974.1	1	+
breambac-131l12.f	Ga_group_01	73.18	645	140	12	57	680	1.49381e+07	1.49386e+07	1e-84	316			breambac-131l12	2	same	89851.3	1	+	MAX	breambac-131l12.f
breambac-63d2.r	Ga_group_01	76.9	567	113	9	46	606	1.49387e+07	1.49383e+07	9e-102	374			breambac-63d2	2	same	73706.7	-1	+
breambac-91e21.r	Ga_group_01	80	80	16	0	561	640	1.49389e+07	14938991	1e-12	77.7			breambac-91e21	2	same	70405.7	1	+
breambac-112e11.r	Ga_group_01	68.42	190	51	3	2	191	1.49498e+07	1.49496e+07	1e-11	74.5			breambac-112e11	2	same	61514	-1	+
breambac-105g2.f	Ga_group_01	74.77	218	44	4	240	452	1.4953e+07	1.49528e+07	2e-26	123			breambac-105g2	2	same	84354.8	-1	+
breambac-60m24.r	Ga_group_01	85.86	601	80	4	9	605	1.49639e+07	1.49634e+07	0	645			breambac-60m24	2	same	73301.5	-1	+		breambac-60m24.r
breambac-133p1.r	Ga_group_01	75.79	475	82	9	35	493	1.49719e+07	1.49723e+07	6e-67	258			breambac-133p1	2	same	72978.8	1	+
breambac-92m9.r	Ga_group_01	75.37	475	84	9	45	503	1.49719e+07	1.49723e+07	6e-65	252			breambac-92m9	2	same	108253	1	+	MAX	breambac-92m9.r
breambac-127g7.f	Ga_group_01	78.92	185	35	1	1	185	1.49744e+07	1.49743e+07	2e-36	156			breambac-127g7	2	same	65974.1	-1	+
breambac-91e21.f	Ga_group_01	84.95	319	39	4	3	316	1.50093e+07	1.50091e+07	3e-82	309			breambac-91e21	2	same	70405.7	-1	+
breambac-31i13.r	Ga_group_01	89.03	155	14	1	474	625	1.50131e+07	1.50132e+07	1e-43	180			breambac-31i13	2	same	67061.7	1	+
breambac-131l12.r	Ga_group_01	82.45	473	73	4	199	668	1.5028e+07	1.50275e+07	8e-122	440			breambac-131l12	2	same	89851.3	-1	+		breambac-131l12.r
breambac-133p1.f	Ga_group_01	73.22	295	63	6	8	302	1.50449e+07	1.50447e+07	5e-32	142			breambac-133p1	2	same	72978.8	-1	+
breambac-100j4.f	Ga_group_01	76.55	290	60	4	26	310	1.50453e+07	1.50455e+07	8e-50	201			breambac-100j4	2	same	90622.5	1	+
breambac-9n22.f	Ga_group_01	77.11	284	57	4	21	299	1.50453e+07	1.50455e+07	7e-50	201			breambac-9n22	2	same	94291.1	1	+
breambac-141g14.r	Ga_group_01	83.24	555	73	7	77	630	1.50505e+07	1.50509e+07	1e-135	486			breambac-141g14	2	same	89074.3	1	+
breambac-51j8.f	Ga_group_01	90.49	305	28	1	366	670	1.50518e+07	1.50521e+07	1e-104	383			breambac-51j8	2	same	87712.6	1	+
breambac-41b23.f	Ga_group_01	88.19	364	36	4	268	627	1.50676e+07	15067981	2e-109	399			breambac-41b23	2	same	104605	1	+	MAX	breambac-41b23.f
breambac-31i13.f	Ga_group_01	87.18	429	33	9	6	424	1.50802e+07	1.50797e+07	1e-107	393			breambac-31i13	2	same	67061.7	-1	+
breambac-92m9.f	Ga_group_01	88.11	429	29	9	6	424	1.50802e+07	1.50797e+07	3e-111	405			breambac-92m9	2	same	108253	-1	+		breambac-92m9.f
breambac-25l21.f	Ga_group_01	74.17	240	56	4	76	313	15095768	1.5096e+07	9e-35	150			breambac-25l21	2	same	3309671	1	-
breambac-96l21.f	Ga_group_01	79.84	248	40	3	176	423	1.51048e+07	1.5105e+07	7e-48	194			breambac-96l21	2	same	126116	1	+
breambac-134n16.f	Ga_group_01	77.08	384	73	5	84	461	1.51333e+07	1.51336e+07	9e-70	267			breambac-134n16	2	same	62793.7	1	+
breambac-105f8.f	Ga_group_01	77.08	384	73	5	84	461	1.51333e+07	1.51336e+07	7e-70	267			breambac-105f8	2	same	62824.5	1	+
breambac-100j4.r	Ga_group_01	86.98	215	27	1	475	689	1.51359e+07	1.51357e+07	1e-62	244			breambac-100j4	2	same	90622.5	-1	+
breambac-51j8.r	Ga_group_01	86.36	506	58	6	211	715	1.51395e+07	1.51391e+07	4e-146	521			breambac-51j8	2	same	87712.6	-1	+
breambac-141g14.f	Ga_group_01	89.68	407	38	3	232	638	1.51395e+07	1.51392e+07	1e-134	483			breambac-141g14	2	same	89074.3	-1	+
breambac-9n22.r	Ga_group_01	87.37	491	51	6	211	700	1.51395e+07	1.51391e+07	4e-145	518			breambac-9n22	2	same	94291.1	-1	+
breambac-54d17.r	Ga_group_01	81.28	374	59	6	124	497	1.51399e+07	1.51402e+07	7e-82	307			breambac-54d17	2	same	131375	1	+	MAX	breambac-54d17.r
breambac-20k8.f	Ga_group_01	78.51	377	68	4	1	375	15147199	15147564	5e-78	294			breambac-20k8	2	same	81322	1	+
breambac-41b23.r	Ga_group_01	88.04	669	70	5	62	724	1.51722e+07	1.51716e+07	0	752			breambac-41b23	2	same	104605	-1	+		breambac-41b23.r
breambac-85d10.r	Ga_group_01	76.27	59	14	0	654	712	15172784	1.51728e+07	0.0002	50.7			breambac-85d10	2	same	56210.8	1	-
breambac-134n16.r	Ga_group_01	80.4	352	59	4	251	594	15196113	15195797	2e-77	293			breambac-134n16	2	same	62793.7	-1	+
breambac-105f8.r	Ga_group_01	78.32	392	73	5	1	382	1.51961e+07	15195797	7e-78	294			breambac-105f8	2	same	62824.5	-1	+
breambac-85d10.f	Ga_group_01	82.82	227	36	2	113	339	1.52273e+07	1.5229e+07	1e-54	217			breambac-85d10	2	same	56210.8	1	-
breambac-98i9.f	Ga_group_01	78.19	243	45	3	206	441	1.52276e+07	1.52278e+07	4e-44	182			breambac-98i9	2	same	64300.8	1	+
breambac-20k8.r	Ga_group_01	66.29	178	58	2	193	370	15228521	15228346	1e-11	74.5			breambac-20k8	2	same	81322	-1	+
breambac-96l21.r	Ga_group_01	88.11	328	34	3	349	676	1.52309e+07	1.52306e+07	3e-101	372			breambac-96l21	2	same	126116	-1	+
breambac-114k1.r	Ga_group_01	91.43	420	32	2	110	527	1.52546e+07	15254989	5e-149	530			breambac-114k1	2	same	49767.1	1	+
breambac-71d15.r	Ga_group_01	70.2	302	76	4	81	382	1.52566e+07	1.52597e+07	1e-31	141			breambac-71d15	2	same	88701.7	1	+	MAX	breambac-71d15.r
breambac-137n16.r	Ga_group_01	81.61	310	47	2	522	830	1.52616e+07	1.52619e+07	1e-72	277			breambac-137n16	2	same	59282.2	1	+
breambac-54d17.f	Ga_group_01	83.14	427	64	3	115	539	1.52713e+07	1.52709e+07	9e-114	413			breambac-54d17	2	same	131375	-1	+		breambac-54d17.f
breambac-7e11.f	Ga_group_01	86.77	189	23	1	1	189	1.52714e+07	1.52716e+07	1e-52	210			breambac-7e11	2	same	77307	1	+	MAX	breambac-7e11.f
breambac-98i9.r	Ga_group_01	82.86	280	43	2	20	299	15291888	1.52917e+07	1e-69	266			breambac-98i9	2	same	64300.8	-1	+
breambac-114k1.f	Ga_group_01	74.28	727	150	15	1	711	1.53044e+07	1.53038e+07	1e-104	383			breambac-114k1	2	same	49767.1	-1	+
breambac-137n16.f	Ga_group_01	71.35	342	72	5	275	590	1.53209e+07	1.53207e+07	5e-35	152			breambac-137n16	2	same	59282.2	-1	+
breambac-109c5.f	Ga_group_01	76.47	102	23	1	732	832	15338965	1.53389e+07	2e-12	77.7			breambac-109c5	2	same	6.97042e+06	-1	-
breambac-71d15.f	Ga_group_01	83.4	241	37	2	15	254	1.53453e+07	1.53451e+07	3e-60	236			breambac-71d15	2	same	88701.7	-1	+		breambac-71d15.f
breambac-10n2.f	Ga_group_01	85.6	250	26	2	273	522	1.53456e+07	1.53458e+07	1e-64	250			breambac-10n2	2	same	88463.5	1	+	MAX	breambac-10n2.f
breambac-7e11.r	Ga_group_01	82.96	452	63	8	8	449	1.53487e+07	1.53483e+07	5e-106	388			breambac-7e11	2	same	77307	-1	+		breambac-7e11.r
breambac-109l15.r	Ga_group_01	75.37	268	43	7	6	257	1.53487e+07	1.53489e+07	7e-27	125			breambac-109l15	2	same	60558.6	1	+
breambac-20b15.r	Ga_group_01	90.86	186	16	1	610	794	1.53641e+07	1.53643e+07	3e-59	232			breambac-20b15	2	same	97663.1	1	+
breambac-29a3.r	Ga_group_01	86.24	567	70	2	23	589	1.53647e+07	1.53641e+07	9e-176	619			breambac-29a3	2	same	1.07397e+07	-1	-
breambac-63p2.r	Ga_group_01	84.75	341	44	4	39	376	1.53655e+07	1.53657e+07	9e-87	323			breambac-63p2	2	same	138684	1	+
breambac-37m15.f	Ga_group_01	90.66	792	58	10	1	789	15370334	1.5371e+07	0	901			breambac-37m15	2	same	108445	1	+
breambac-61l12.f	Ga_group_01	90.4	698	46	8	1	694	15370334	1.53709e+07	0	776			breambac-61l12	2	same	133803	1	+	MAX	breambac-61l12.f
breambac-30k20.f	Ga_group_01	82.79	122	20	1	262	383	15380614	15380734	6e-25	118			breambac-30k20	2	same	93257	1	+
breambac-109l15.f	Ga_group_01	82.35	136	19	2	3	133	15409274	1.54091e+07	2e-24	117			breambac-109l15	2	same	60558.6	-1	+
breambac-136g24.f	Ga_group_01	77.92	308	59	3	372	676	15411108	1.54114e+07	3e-60	236			breambac-136g24	2	same	87075	1	+
breambac-10n2.r	Ga_group_01	81.03	253	39	7	171	419	1.5434e+07	1.54338e+07	3e-40	169			breambac-10n2	2	same	88463.5	-1	+		breambac-10n2.r
breambac-64d18.r	Ga_group_01	92.17	115	9	0	253	367	15434802	1.54349e+07	3e-36	155	8		breambac-64d18	2	same	1.42382e+06	1	-
breambac-60d4.f	Ga_group_01	92.98	299	19	2	3	301	1.54584e+07	1.54588e+07	6e-107	389	8		breambac-60d4	2	same	1.40354e+06	1	-
breambac-82g9.r	Ga_group_01	86.87	518	54	5	15	532	1.54585e+07	1.5459e+07	9e-145	516	8		breambac-82g9	2	same	1.40172e+06	1	-
breambac-20b15.f	Ga_group_01	73.48	279	67	4	157	429	1.54617e+07	1.54615e+07	2e-37	160			breambac-20b15	2	same	97663.1	-1	+
breambac-30k20.r	Ga_group_01	73.77	61	16	0	624	684	15473871	15473811	0.0006	49.1			breambac-30k20	2	same	93257	-1	+
breambac-33b9.f	Ga_group_01	94.44	72	4	0	702	773	1.54787e+07	1.54787e+07	4e-20	103	8		breambac-33b9	2	same	1.36232e+06	1	-
breambac-37m15.r	Ga_group_01	90.53	169	15	1	1	169	1.54788e+07	1.54787e+07	4e-52	209			breambac-37m15	2	same	108445	-1	+
breambac-33n10.f	Ga_group_01	85.86	99	14	0	302	400	1.5491e+07	1.54911e+07	2e-23	114			breambac-33n10	2	same	7.95094e+06	1	-
breambac-136g24.r	Ga_group_01	84.62	195	30	0	1	195	15498183	1.5498e+07	3e-54	215			breambac-136g24	2	same	87075	-1	+
breambac-61l12.r	Ga_group_01	75.24	105	26	0	156	260	1.55041e+07	1.55041e+07	3e-15	85.6			breambac-61l12	2	same	133803	-1	+	Contig End	breambac-61l12.r
breambac-63p2.f	Ga_group_01	75.24	105	26	0	234	338	1.55041e+07	1.55041e+07	4e-15	85.6			breambac-63p2	2	same	138684	-1	+
breambac-60a21.f	Ga_group_01	77.58	660	137	8	1	649	1.55158e+07	1.55164e+07	5e-139	497	8		breambac-60a21	2	same	1.31333e+06	1	-
breambac-123b21.f	Ga_group_01	57.53	73	31	0	24	96	1.55635e+07	1.55635e+07	3e-06	55.5			breambac-123b21	2	same	63804.7	1	+	Contig Start	breambac-123b21.f
breambac-16o4.r	Ga_group_01	70.93	86	25	0	409	494	15574947	1.5575e+07	8e-07	58.6			breambac-16o4	2	same	96552.2	1	+	MAX	breambac-16o4.r
breambac-28a17.r	Ga_group_01	71.26	254	58	3	199	440	1.56064e+07	1.56062e+07	6e-26	122	8		breambac-28a17	2	same	1.35156e+06	-1	-
breambac-75l6.f	Ga_group_01	69.7	99	29	1	31	128	1.56073e+07	1.56074e+07	2e-05	53.9			breambac-75l6	2	same	19999.8	1	+
breambac-14b10.f	Ga_group_01	77.59	174	26	4	190	353	1.5622e+07	1.56221e+07	4.03492e-304	101	10		breambac-14b10	2	same	1.4593e+06	1	+
breambac-75l6.r	Ga_group_01	78.31	189	29	3	525	702	1.56273e+07	1.56271e+07	4.67307e+06	128			breambac-75l6	2	same	19999.8	-1	+
breambac-123b21.r	Ga_group_01	76.88	173	28	3	512	673	1.56273e+07	1.56271e+07	-6.72487e-306	107			breambac-123b21	2	same	63804.7	-1	+		breambac-123b21.r
breambac-33f4.r	Ga_group_01	86.59	82	10	1	248	328	1.56278e+07	1.56278e+07	2.05227e-304	87.2	10		breambac-33f4	2	same	1458805	1	+
breambac-16o4.f	Ga_group_01	87.45	231	27	1	429	659	1.56715e+07	15671299	3.53369e+07	253			breambac-16o4	2	same	96552.2	-1	+	Contig End	breambac-16o4.f
breambac-25h5.r	Ga_group_01	81.54	195	33	3	133	324	1.56942e+07	1.56941e+07	22300.7	168			breambac-25h5	2	same	180392	-1	-
breambac-13k1.r	Ga_group_01	84.56	136	16	3	539	669	15694706	1.56948e+07	2.64433e-304	118	9		breambac-13k1	2	same	1.2872e+06	1	-
breambac-47p1.r	Ga_group_01	86.77	189	25	0	497	685	1.56966e+07	1.56965e+07	2.46826e+07	221			breambac-47p1	2	same	85010	-1	-
breambac-121f17.r	Ga_group_01	84.62	78	7	1	123	195	1.57011e+07	1.5701e+07	1e-10	71.3			breambac-121f17	2	same	86495.5	-1	-
breambac-38a23.f	Ga_group_01	79.41	102	19	2	303	403	1.57297e+07	15729615	2e-12	77.7			breambac-38a23	2	same	17897.5	-1	-
breambac-21k10.f	Ga_group_01	73.53	102	25	1	452	551	1.57384e+07	1.57383e+07	3e-09	66.6	9		breambac-21k10	2	same	1.3137e+06	-1	-
breambac-38a23.r	Ga_group_01	81.16	138	23	2	239	375	1.57475e+07	1.57456e+07	2e-24	117			breambac-38a23	2	same	17897.5	-1	-
breambac-81p21.r	Ga_group_01	81.16	138	23	2	183	319	1.57475e+07	1.57456e+07	1e-24	117	9		breambac-81p21	2	same	1295280	-1	-
breambac-87o10.f	Ga_group_01	71.1	173	46	2	97	265	1.57535e+07	1.57536e+07	9e-18	95.1			breambac-87o10	2	same	127185	1	+	Contig Start	breambac-87o10.f
breambac-69f6.r	Ga_group_01	75.65	115	27	1	503	617	1.57538e+07	1.57539e+07	6e-15	85.6			breambac-69f6	2	same	126863	1	+
breambac-60o10.f	Ga_group_01	75.54	233	50	2	314	540	1.57609e+07	1.57611e+07	3e-38	163			breambac-60o10	2	same	119770	1	+
breambac-117n9.r	Ga_group_01	85.04	127	15	2	347	472	1.5764e+07	1.57641e+07	2e-25	120			breambac-117n9	2	same	173220	1	+	MAX	breambac-117n9.r
breambac-47p1.f	Ga_group_01	79.6	201	37	2	249	446	1.57815e+07	1.57813e+07	5e-23	112			breambac-47p1	2	same	85010	-1	-
breambac-2p7.f	Ga_group_01	74.65	71	17	1	616	686	1.57843e+07	1.57842e+07	0.002	47.5			breambac-2p7	2	same	4.26165e+06	-1	-
breambac-43n11.r	Ga_group_01	81.45	124	20	2	401	521	1.57869e+07	1.57868e+07	1e-20	104			breambac-43n11	2	same	7.80678e+06	-1	-
breambac-121f17.f	Ga_group_01	88.62	123	14	0	504	626	1.57875e+07	1.57874e+07	6e-35	152			breambac-121f17	2	same	86495.5	-1	-
breambac-23i22.r	Ga_group_01	86.05	43	6	0	40	82	1.58165e+07	15816495	0.0002	50.7			breambac-23i22	2	same	7.41604e+06	-1	+
breambac-25h5.f	Ga_group_01	85.71	224	18	4	434	651	1.58745e+07	1.58743e+07	1e-49	201			breambac-25h5	2	same	180392	-1	-
breambac-60o10.r	Ga_group_01	91.07	168	15	0	271	438	1.58807e+07	1.58805e+07	1e-55	220			breambac-60o10	2	same	119770	-1	+
breambac-69f6.f	Ga_group_01	91.07	168	15	0	271	438	1.58807e+07	1.58805e+07	1e-55	220			breambac-69f6	2	same	126863	-1	+
breambac-87o10.r	Ga_group_01	91.07	168	15	0	341	508	1.58807e+07	1.58805e+07	2e-55	220			breambac-87o10	2	same	127185	-1	+		breambac-87o10.r
breambac-143o3.r	Ga_group_01	75	88	22	0	390	477	1.59103e+07	1.59102e+07	2e-10	71.3			breambac-143o3	2	same	6.87986e+06	-1	-
breambac-117n9.f	Ga_group_01	73.73	335	67	4	67	381	1.59373e+07	1.5937e+07	3e-44	182			breambac-117n9	2	same	173220	-1	+	Contig End	breambac-117n9.f
breambac-133l11.r	Ga_group_01	80.98	610	90	8	121	723	1.6e+07	1.60005e+07	2e-138	496			breambac-133l11	2	same	76854.7	1	+	Contig Start	breambac-133l11.r
breambac-8m6.f	Ga_group_01	80.43	92	17	1	122	213	1.60197e+07	1.60198e+07	2e-13	80.8			breambac-8m6	2	same	3.96258e+06	1	-
breambac-133l11.f	Ga_group_01	77.67	103	23	0	110	212	1.60768e+07	1.60767e+07	8e-17	91.9			breambac-133l11	2	same	76854.7	-1	+	Contig End	breambac-133l11.f
breambac-18f6.f	Ga_group_01	71.94	196	51	1	510	701	1.60772e+07	1.60773e+07	2e-35	153			breambac-18f6	2	same	64196.2	1	+	Contig Start	breambac-18f6.f
breambac-140m17.f	Ga_group_01	82.33	430	55	7	137	563	1.61192e+07	1.61196e+07	1e-95	353			breambac-140m17	2	same	68349.3	1	+
breambac-53o5.r	Ga_group_01	68.15	135	38	2	397	526	1.61393e+07	16139371	7e-06	55.5			breambac-53o5	2	same	116681	1	+	MAX	breambac-53o5.r
breambac-18f6.r	Ga_group_01	81.19	101	19	0	48	148	1.61414e+07	1.61413e+07	1e-19	101			breambac-18f6	2	same	64196.2	-1	+		breambac-18f6.r
breambac-16m1.f	Ga_group_01	73.21	280	53	7	288	558	16141751	1.61417e+07	2e-24	117			breambac-16m1	2	same	103825	-1	-
breambac-129l15.f	Ga_group_01	74.44	133	29	2	233	362	1.61453e+07	1.61454e+07	1e-13	80.8			breambac-129l15	2	same	100195	1	+
breambac-140m17.r	Ga_group_01	88.97	145	13	1	273	414	16187588	1.61875e+07	6e-40	168			breambac-140m17	2	same	68349.3	-1	+
breambac-3o13.f	Ga_group_01	73.93	234	53	4	26	252	1.61879e+07	1.61883e+07	8e-30	134			breambac-3o13	2	same	77637.6	1	+
breambac-136h2.r	Ga_group_01	74.45	227	50	4	6	225	1.61879e+07	1.61883e+07	4e-29	133			breambac-136h2	2	same	77632.2	1	+
breambac-64j11.r	Ga_group_01	75.88	257	51	3	74	325	1.61919e+07	1.61921e+07	1e-38	163			breambac-64j11	2	same	90003.8	1	+
breambac-129l15.r	Ga_group_01	73.65	296	48	5	160	431	1.62455e+07	1.62453e+07	5e-26	122			breambac-129l15	2	same	100195	-1	+
breambac-16m1.r	Ga_group_01	73.65	296	48	5	134	405	1.62455e+07	1.62453e+07	6e-26	122			breambac-16m1	2	same	103825	-1	-
breambac-49k20.f	Ga_group_01	77.85	149	32	1	406	554	1.62469e+07	1.62471e+07	1e-22	110			breambac-49k20	2	same	102976	1	+	MAX	breambac-49k20.f
breambac-53o5.f	Ga_group_01	83.33	324	47	4	310	632	1.62559e+07	1.62557e+07	8e-80	301			breambac-53o5	2	same	116681	-1	+		breambac-53o5.f
breambac-27e16.r	Ga_group_01	83.1	71	6	1	280	344	1.62563e+07	1.62564e+07	5e-07	58.6			breambac-27e16	2	same	94147.2	1	+
breambac-136h2.f	Ga_group_01	64.95	214	69	2	329	539	1.62655e+07	1.62654e+07	4e-12	76.1			breambac-136h2	2	same	77632.2	-1	+
breambac-3o13.r	Ga_group_01	70.93	172	43	2	305	473	1.62655e+07	1.62654e+07	3e-11	72.9			breambac-3o13	2	same	77637.6	-1	+
breambac-47g4.f	Ga_group_01	72.43	214	55	1	435	648	1.6274e+07	16274196	1e-42	177			breambac-47g4	2	same	76422.9	1	+
breambac-97c14.r	Ga_group_01	70.44	203	54	1	412	614	1.6274e+07	16274186	2e-36	156			breambac-97c14	2	same	86556.7	1	+
breambac-110f20.r	Ga_group_01	66.4	634	194	12	19	647	1.62795e+07	1.62801e+07	3e-60	236			breambac-110f20	2	same	70992.5	1	+
breambac-64j11.f	Ga_group_01	82.58	333	51	6	26	354	1.62819e+07	1.62817e+07	1e-75	286			breambac-64j11	2	same	90003.8	-1	+
breambac-68g19.r	Ga_group_01	80.77	130	23	1	509	636	1.63495e+07	1.63496e+07	2e-24	117			breambac-68g19	2	same	53315	1	+	MAX	breambac-68g19.r
breambac-49k20.r	Ga_group_01	76.04	313	65	7	1	308	1.63499e+07	1.63497e+07	6e-46	188			breambac-49k20	2	same	102976	-1	+		breambac-49k20.r
breambac-110f20.f	Ga_group_01	82.2	191	32	2	428	618	1.63505e+07	1.63503e+07	2e-42	177			breambac-110f20	2	same	70992.5	-1	+
breambac-47g4.r	Ga_group_01	82.2	191	32	2	375	565	1.63505e+07	1.63503e+07	2e-42	177			breambac-47g4	2	same	76422.9	-1	+
breambac-27e16.f	Ga_group_01	82.2	191	32	2	427	617	1.63505e+07	1.63503e+07	1e-42	177			breambac-27e16	2	same	94147.2	-1	+
breambac-71g14.f	Ga_group_01	77.81	347	72	4	244	588	1.63524e+07	1.63527e+07	3e-70	269			breambac-71g14	2	same	50370.5	1	+
breambac-54k18.r	Ga_group_01	84.14	309	47	1	351	659	1.63603e+07	1.63606e+07	6e-87	324			breambac-54k18	2	same	74532.9	1	+
breambac-97c14.f	Ga_group_01	84.14	309	47	1	25	333	1.63606e+07	1.63603e+07	4e-87	324			breambac-97c14	2	same	86556.7	-1	+
breambac-50l11.r	Ga_group_01	92.05	151	12	0	439	589	1.63608e+07	1.63609e+07	4e-50	202			breambac-50l11	2	same	41992	1	+
breambac-73b8.r	Ga_group_01	92.05	151	12	0	435	585	1.63608e+07	1.63609e+07	3e-50	202			breambac-73b8	2	same	45751.6	1	+
breambac-35g20.r	Ga_group_01	92.05	151	12	0	442	592	1.63608e+07	1.63609e+07	4e-50	202			breambac-35g20	2	same	52554.6	1	+
breambac-60p17.r	Ga_group_01	77.22	158	24	3	6	161	1.63611e+07	1.63612e+07	6e-17	91.9			breambac-60p17	2	same	129785	1	+	MAX	breambac-60p17.r
breambac-19d16.f	Ga_group_01	85.56	90	13	0	13	102	1.63611e+07	1.63612e+07	2e-20	103			breambac-19d16	2	same	73701.6	1	+
breambac-133i14.r	Ga_group_01	88.57	140	14	2	544	681	1.63784e+07	1.63785e+07	2e-35	153			breambac-133i14	2	same	834629	1	+
breambac-50l11.f	Ga_group_01	82.27	220	38	1	417	636	1.64028e+07	1.64026e+07	2e-54	217			breambac-50l11	2	same	41992	-1	+
breambac-71g14.r	Ga_group_01	82.27	220	38	1	378	597	1.64028e+07	1.64026e+07	2e-54	217			breambac-71g14	2	same	50370.5	-1	+
breambac-68g19.f	Ga_group_01	82.27	220	38	1	421	640	1.64028e+07	1.64026e+07	2e-54	217			breambac-68g19	2	same	53315	-1	+		breambac-68g19.f
breambac-73b8.f	Ga_group_01	81.97	355	53	5	33	382	1.64065e+07	1.64063e+07	1e-80	304			breambac-73b8	2	same	45751.6	-1	+
breambac-140l6.f	Ga_group_01	78.38	333	61	5	69	400	1.64111e+07	1.64113e+07	1e-62	244			breambac-140l6	2	same	48702.8	1	+
breambac-35g20.f	Ga_group_01	85.71	77	11	0	716	792	1.64133e+07	1.64133e+07	8e-16	88.8			breambac-35g20	2	same	52554.6	-1	+
breambac-19d16.r	Ga_group_01	85.11	188	23	1	218	405	1.64349e+07	1.64347e+07	5e-48	194			breambac-19d16	2	same	73701.6	-1	+
breambac-54k18.f	Ga_group_01	75.91	328	67	4	259	585	1.64349e+07	1.64346e+07	4e-54	215			breambac-54k18	2	same	74532.9	-1	+
breambac-140l6.r	Ga_group_01	72.67	172	36	2	522	693	1.64598e+07	1.64596e+07	9e-18	95.1			breambac-140l6	2	same	48702.8	-1	+
breambac-140a16.f	Ga_group_01	77.83	212	41	4	5	214	1.64719e+07	1.64721e+07	2e-33	147			breambac-140a16	2	same	95383.5	1	+
breambac-111c3.f	Ga_group_01	85.45	165	20	1	352	516	1.64742e+07	1.64744e+07	4e-41	172			breambac-111c3	2	same	75643.1	1	+
breambac-50n6.f	Ga_group_01	85.45	165	20	1	349	513	1.64742e+07	1.64744e+07	4e-41	172			breambac-50n6	2	same	116959	1	+	MAX	breambac-50n6.f
breambac-41p11.r	Ga_group_01	77.49	271	49	3	430	695	1.6481e+07	1.64812e+07	8e-48	194			breambac-41p11	2	same	86298.9	1	+
breambac-60p17.f	Ga_group_01	75.78	223	46	3	74	295	1.64909e+07	1.64907e+07	1e-33	147			breambac-60p17	2	same	129785	-1	+		breambac-60p17.f
breambac-66n16.f	Ga_group_01	85	180	27	0	294	473	1.64941e+07	1.64942e+07	2e-50	202			breambac-66n16	2	same	97909	1	+
breambac-5n23.f	Ga_group_01	85.61	570	80	1	135	704	1.65079e+07	1.65083e+07	5e-180	633			breambac-5n23	2	same	83414.5	1	+
breambac-101h17.r	Ga_group_01	84.35	556	85	1	109	664	1.65079e+07	1.65083e+07	1e-168	595			breambac-101h17	2	same	84163.9	1	+
breambac-41k4.f	Ga_group_01	73.24	299	55	7	322	603	1.65152e+07	1.65154e+07	2e-27	126			breambac-41k4	2	same	76106.1	1	+
breambac-43d3.f	Ga_group_01	79.62	157	32	0	584	740	1.65192e+07	1.65193e+07	2e-34	150			breambac-43d3	2	same	72112.7	1	+
breambac-54g15.f	Ga_group_01	77.71	157	35	0	599	755	1.65192e+07	1.65193e+07	1e-31	141			breambac-54g15	2	same	66612.6	1	-
breambac-33l15.r	Ga_group_01	90.59	457	43	0	1	457	1.65283e+07	1.65286e+07	8e-167	589			breambac-33l15	2	same	62908.5	1	+
breambac-80b18.r	Ga_group_01	82.41	108	18	1	1	107	1.65416e+07	1.65417e+07	3e-20	103			breambac-80b18	2	same	80393.8	1	+	MAX	breambac-80b18.r
breambac-111c3.r	Ga_group_01	75.16	467	97	7	1	459	1.65499e+07	1.65495e+07	6e-76	288			breambac-111c3	2	same	75643.1	-1	+
breambac-127m2.f	Ga_group_01	80.4	597	86	13	37	627	1.65499e+07	16550371	5e-118	427			breambac-127m2	2	same	55238.3	1	+
breambac-25g5.r	Ga_group_01	85.05	321	41	4	1	321	1.65499e+07	1.65502e+07	3e-84	315			breambac-25g5	2	same	55222.2	1	+
breambac-41p11.f	Ga_group_01	72.68	366	97	1	74	436	1.65673e+07	1.65669e+07	6e-65	252			breambac-41p11	2	same	86298.9	-1	+
breambac-140a16.r	Ga_group_01	72.68	366	97	1	44	406	1.65673e+07	1.65669e+07	5e-65	252			breambac-140a16	2	same	95383.5	-1	+
breambac-54g15.r	Ga_group_01	79.52	249	49	1	202	450	1.65856e+07	1.65858e+07	2e-56	223			breambac-54g15	2	same	66612.6	1	-
breambac-33l15.f	Ga_group_01	78.99	276	55	2	62	337	1.65912e+07	1.6591e+07	2e-58	229			breambac-33l15	2	same	62908.5	-1	+
breambac-50n6.r	Ga_group_01	79.35	276	54	2	241	516	1.65912e+07	1.6591e+07	8e-59	231			breambac-50n6	2	same	116959	-1	+		breambac-50n6.r
breambac-43d3.r	Ga_group_01	78.02	232	51	0	308	539	1.65913e+07	1.65911e+07	1e-51	207			breambac-43d3	2	same	72112.7	-1	+
breambac-41k4.r	Ga_group_01	78.02	232	51	0	290	521	1.65913e+07	1.65911e+07	1e-51	207			breambac-41k4	2	same	76106.1	-1	+
breambac-5n23.r	Ga_group_01	78.02	232	51	0	298	529	1.65913e+07	1.65911e+07	1e-51	207			breambac-5n23	2	same	83414.5	-1	+
breambac-66n16.r	Ga_group_01	90.66	182	16	1	1	181	1.6592e+07	16591877	2e-57	226			breambac-66n16	2	same	97909	-1	+
breambac-101h17.f	Ga_group_01	88.78	196	22	0	12	207	16592027	16591877	3e-62	242			breambac-101h17	2	same	84163.9	-1	+
breambac-91k14.f	Ga_group_01	86.88	221	29	0	227	447	1.65965e+07	1.65967e+07	2e-67	259			breambac-91k14	2	same	91881.8	1	+	MAX	breambac-91k14.f
breambac-138g21.r	Ga_group_01	89.72	107	11	0	337	443	1.66004e+07	1.66005e+07	4e-30	136			breambac-138g21	2	same	67465.2	1	+
breambac-25g5.f	Ga_group_01	84.73	334	39	5	216	547	1.66052e+07	16604876	2e-78	296			breambac-25g5	2	same	55222.2	-1	+
breambac-127m2.r	Ga_group_01	84.13	334	41	5	183	514	1.66052e+07	16604876	1e-76	290			breambac-127m2	2	same	55238.3	-1	+
breambac-80b18.f	Ga_group_01	83.42	199	33	0	1	199	16622027	1.66218e+07	3e-53	212			breambac-80b18	2	same	80393.8	-1	+		breambac-80b18.f
breambac-1i2.r	Ga_group_01	84.82	224	34	0	23	246	1.66475e+07	16647739	2e-58	229			breambac-1i2	2	same	121315	1	+
breambac-138g21.f	Ga_group_01	84.5	458	59	4	211	657	1.66679e+07	1.66675e+07	4e-125	451			breambac-138g21	2	same	67465.2	-1	+
breambac-70o6.f	Ga_group_01	82.56	367	64	0	269	635	1.66688e+07	1.66691e+07	1e-103	380			breambac-70o6	2	same	107485	1	+	MAX	breambac-70o6.f
breambac-91k14.r	Ga_group_01	75.42	118	21	3	482	591	1.66884e+07	1.66883e+07	3e-07	60.2			breambac-91k14	2	same	91881.8	-1	+		breambac-91k14.r
breambac-77e17.r	Ga_group_01	80.69	404	49	6	57	446	16697357	1.66977e+07	6e-81	304			breambac-77e17	2	same	74868.3	1	+
breambac-9d9.f	Ga_group_01	80.69	404	49	6	137	526	16697357	1.66977e+07	6e-80	301			breambac-9d9	2	same	90932.2	1	+
breambac-35l8.f	Ga_group_01	86.99	146	19	0	20	165	1.67403e+07	1.67405e+07	4e-41	172			breambac-35l8	2	same	108258	1	+	MAX	breambac-35l8.f
breambac-30o4.f	Ga_group_01	83.96	106	16	1	618	723	1.67454e+07	1.67455e+07	4e-21	106			breambac-30o4	2	same	74909.2	1	+
breambac-101o22.f	Ga_group_01	67.15	277	74	3	160	419	16759156	1.67589e+07	9e-20	101			breambac-101o22	2	same	7.19739e+06	-1	-
breambac-1i2.f	Ga_group_01	76.27	413	81	8	109	513	1.67688e+07	1.67683e+07	4e-66	255			breambac-1i2	2	same	121315	-1	+
breambac-77e17.f	Ga_group_01	73.89	314	74	3	96	404	1.67722e+07	1.6772e+07	2e-50	202			breambac-77e17	2	same	74868.3	-1	+
breambac-70o6.r	Ga_group_01	86.25	502	62	3	242	736	1.67763e+07	1.67758e+07	9e-153	543			breambac-70o6	2	same	107485	-1	+		breambac-70o6.r
breambac-9d9.r	Ga_group_01	92.56	121	9	0	438	558	1.67883e+07	1.67882e+07	9e-39	164			breambac-9d9	2	same	90932.2	-1	+
breambac-139f22.r	Ga_group_01	88.93	244	26	1	447	689	16791429	16791672	2e-77	293			breambac-139f22	2	same	70208	1	+	MAX	breambac-139f22.r
breambac-30o4.r	Ga_group_01	79.87	149	27	1	518	666	1.68204e+07	1.68202e+07	4e-28	129			breambac-30o4	2	same	74909.2	-1	+
breambac-60a21.r	Ga_group_01	91.2	375	11	8	266	619	1.68288e+07	1.68291e+07	6e-99	364	8		breambac-60a21	2	same	1.31333e+06	1	-
breambac-33b9.r	Ga_group_01	78.56	653	119	5	112	744	1.68404e+07	1.6841e+07	1e-145	519	8		breambac-33b9	2	same	1.36232e+06	1	-
breambac-35l8.r	Ga_group_01	67.5	160	48	2	151	307	1.68486e+07	1.68485e+07	8e-10	68.2			breambac-35l8	2	same	108258	-1	+		breambac-35l8.r
breambac-64d18.f	Ga_group_01	84.93	491	67	5	1	489	1.68581e+07	1.68586e+07	5e-138	494	8		breambac-64d18	2	same	1.42382e+06	1	-
breambac-82g9.f	Ga_group_01	71.99	482	96	9	11	467	1.68596e+07	1.68602e+07	3e-50	202	8		breambac-82g9	2	same	1.40172e+06	1	-
breambac-139f22.f	Ga_group_01	76.88	199	38	3	440	638	16861637	16861447	3e-30	136			breambac-139f22	2	same	70208	-1	+	Contig End	breambac-139f22.f
breambac-60d4.r	Ga_group_01	87.63	97	11	1	545	640	1.68619e+07	1.6862e+07	1e-21	107	8		breambac-60d4	2	same	1.40354e+06	1	-
breambac-36a8.r	Ga_group_01	87	200	20	4	479	675	1.69475e+07	1.69477e+07	2e-45	187			breambac-36a8	2	same	92561.2	1	+	Contig Start	breambac-36a8.r
breambac-28a17.f	Ga_group_01	92.35	170	13	0	347	516	1.69578e+07	1.69576e+07	3e-58	229	8		breambac-28a17	2	same	1.35156e+06	-1	-
breambac-13k1.f	Ga_group_01	84.9	192	22	4	19	207	1.69818e+07	1.69819e+07	1e-40	171	9		breambac-13k1	2	same	1.2872e+06	1	-
breambac-37e12.f	Ga_group_01	91.95	87	7	0	312	398	1.69922e+07	1.69922e+07	2e-24	117			breambac-37e12	2	same	76023.2	-1	-
breambac-36a8.f	Ga_group_01	86.21	116	16	0	568	683	17040092	1.704e+07	1e-29	134			breambac-36a8	2	same	92561.2	-1	+	Contig End	breambac-36a8.f
breambac-81p21.f	Ga_group_01	86.96	230	30	0	190	419	1.70407e+07	1.70409e+07	9e-71	271	9		breambac-81p21	2	same	1295280	1	-
breambac-21k10.r	Ga_group_01	84.29	191	24	1	2	192	1.70519e+07	1.7052e+07	7e-47	191	9		breambac-21k10	2	same	1.3137e+06	1	-
breambac-37e12.r	Ga_group_01	82.32	164	29	0	556	719	1.70682e+07	1.70645e+07	1e-40	171			breambac-37e12	2	same	76023.2	-1	-
breambac-14b10.r	Ga_group_01	80.68	176	20	5	80	254	1.70813e+07	17081126	1e-22	110	10		breambac-14b10	2	same	1.4593e+06	-1	+
breambac-33f4.f	Ga_group_01	82.56	172	27	1	523	691	1.70866e+07	1.70864e+07	3e-39	166	10		breambac-33f4	2	same	1458805	-1	+
breambac-131j14.r	Ga_group_01	63.64	176	64	0	61	236	1.7117e+07	1.71171e+07	2e-12	77.7			breambac-131j14	2	same	233914	1	-
breambac-16i5.r	Ga_group_01	63.64	176	64	0	52	227	1.7117e+07	1.71171e+07	1e-12	77.7			breambac-16i5	2	same	233914	1	-
breambac-32a3.f	Ga_group_01	80.37	107	18	1	507	610	1.71409e+07	1.7141e+07	7e-17	91.9			breambac-32a3	2	same	16513.5	1	+	Contig Start	breambac-32a3.f
breambac-32a3.r	Ga_group_01	83.9	118	11	2	193	310	1.71575e+07	1.71574e+07	4e-19	99.9			breambac-32a3	2	same	16513.5	-1	+	Contig End	breambac-32a3.r
breambac-133i14.f	Ga_group_01	78.41	88	16	2	365	452	1.7213e+07	1.7213e+07	3e-07	60.2			breambac-133i14	2	same	834629	-1	+
breambac-60k6.r	Ga_group_01	72.15	79	22	0	297	375	1.72175e+07	1.72176e+07	1e-06	57.1			breambac-60k6	2	same	242459	1	+	Contig Start	breambac-60k6.r
breambac-29k19.r	Ga_group_01	93.6	172	11	0	75	246	1.72488e+07	1.7249e+07	4e-61	239			breambac-29k19	2	same	32781.2	1	+
breambac-66g9.r	Ga_group_01	93.6	172	11	0	72	243	1.72488e+07	1.7249e+07	3e-61	239			breambac-66g9	2	same	239440	1	+	MAX	breambac-66g9.r
breambac-29k19.f	Ga_group_01	75.68	185	45	0	222	406	1.72816e+07	1.72814e+07	1e-43	180			breambac-29k19	2	same	32781.2	-1	+
breambac-117a21.r	Ga_group_01	94.58	203	11	0	330	532	1.73501e+07	1.73499e+07	6e-76	288			breambac-117a21	2	same	74823.8	-1	-
breambac-131j14.f	Ga_group_01	73.66	224	59	0	63	286	1.73507e+07	1.73509e+07	6e-46	188			breambac-131j14	2	same	233914	1	-
breambac-16i5.f	Ga_group_01	73.66	224	59	0	53	276	1.73507e+07	1.73509e+07	6e-46	188			breambac-16i5	2	same	233914	1	-
breambac-117a21.f	Ga_group_01	80.97	352	52	5	326	665	1.74241e+07	1.74248e+07	4e-73	278			breambac-117a21	2	same	74823.8	1	-
breambac-16m14.r	Ga_group_01	69.4	183	51	3	390	570	1.74328e+07	1.74329e+07	5e-14	82.4			breambac-16m14	2	same	1.04103e+07	1	+
breambac-60k6.f	Ga_group_01	89.51	267	22	3	236	501	1.746e+07	1.74597e+07	2e-80	302			breambac-60k6	2	same	242459	-1	+		breambac-60k6.f
breambac-58i12.r	Ga_group_01	77.38	84	14	2	1	80	1.74633e+07	1.74632e+07	0.0002	50.7			breambac-58i12	2	same	1.3069e+07	-1	+
breambac-66g9.f	Ga_group_01	84.81	349	38	4	67	415	1.74883e+07	1.7488e+07	4e-89	331			breambac-66g9	2	same	239440	-1	+	Contig End	breambac-66g9.f
breambac-41o4.r	Ga_group_01	94.48	290	16	0	264	553	1.75803e+07	1.75806e+07	3e-113	412			breambac-41o4	2	same	50275.8	1	+	Contig Start	breambac-41o4.r
breambac-41o4.f	Ga_group_01	83.41	452	63	5	1	450	1.76306e+07	1.76303e+07	2e-108	396			breambac-41o4	2	same	50275.8	-1	+	Contig End	breambac-41o4.f
breambac-74n7.r	Ga_group_01	75.52	339	67	4	361	697	1.76444e+07	1.76447e+07	7e-58	228			breambac-74n7	2	same	106769	1	+	Contig Start	breambac-74n7.r
breambac-32a22.r	Ga_group_01	81.67	480	64	6	196	666	1.77004e+07	1.7705e+07	7e-109	397			breambac-32a22	2	same	98765.2	1	+
breambac-42o1.f	Ga_group_01	81.67	480	64	6	227	697	1.77004e+07	1.7705e+07	7e-109	397			breambac-42o1	2	same	98765.2	1	+
breambac-17n11.f	Ga_group_01	81.46	480	65	6	227	697	1.77004e+07	1.7705e+07	6e-108	394			breambac-17n11	2	same	110292	1	+	MAX	breambac-17n11.f
breambac-30l3.r	Ga_group_01	76.4	178	36	3	212	389	17700930	17701101	2e-24	117			breambac-30l3	2	same	57609	1	+
breambac-74n7.f	Ga_group_01	100	28	0	0	567	594	1.77512e+07	1.77512e+07	0.005	46			breambac-74n7	2	same	106769	-1	+		breambac-74n7.f
breambac-125l14.r	Ga_group_01	79	100	15	2	37	136	17756055	17756148	8e-10	68.2			breambac-125l14	2	same	110220	1	+	MAX	breambac-125l14.r
breambac-30l3.f	Ga_group_01	82.93	123	18	3	17	137	17758539	17758418	9e-20	101			breambac-30l3	2	same	57609	-1	+
breambac-133d12.f	Ga_group_01	68.45	355	110	1	63	415	1.77972e+07	1.77956e+07	7e-49	198			breambac-133d12	2	same	7.16433e+06	-1	-
breambac-32a22.f	Ga_group_01	79.78	267	40	5	51	314	1.77992e+07	1.7799e+07	5e-44	182			breambac-32a22	2	same	98765.2	-1	+
breambac-42o1.r	Ga_group_01	79.78	267	40	5	18	281	1.77992e+07	1.7799e+07	4e-44	182			breambac-42o1	2	same	98765.2	-1	+
breambac-17n11.r	Ga_group_01	87.34	79	10	0	350	428	1.78107e+07	1.78106e+07	5e-18	95.1			breambac-17n11	2	same	110292	-1	+		breambac-17n11.r
breambac-125l14.f	Ga_group_01	74.14	58	15	0	240	297	17866275	17866218	0.004	46			breambac-125l14	2	same	110220	-1	+	Contig End	breambac-125l14.f
breambac-81b16.r	Ga_group_01	69.85	136	33	2	152	280	1.79357e+07	1.7936e+07	4e-07	58.6	1		breambac-81b16	2	same	1.73718e+07	1	-
breambac-136m14.f	Ga_group_01	80.62	160	31	0	525	684	1.79641e+07	1.79642e+07	7e-37	158			breambac-136m14	2	same	50883.2	1	+	Contig Start	breambac-136m14.f
breambac-136m14.r	Ga_group_01	72.74	664	173	3	106	761	1.8015e+07	1.80145e+07	1e-122	443			breambac-136m14	2	same	50883.2	-1	+	Contig End	breambac-136m14.r
breambac-101o11.r	Ga_group_01	71.15	357	97	2	260	610	1.80168e+07	1.80166e+07	5e-54	215	1		breambac-101o11	2	same	17452901	-1	+
breambac-30g22.f	Ga_group_01	76.6	235	49	3	291	524	1.8091e+07	1.80912e+07	5e-33	145	1		breambac-30g22	2	same	1.74158e+07	1	-
breambac-50n16.f	Ga_group_01	83.18	107	15	1	494	597	1.80943e+07	1.80943e+07	1e-19	101			breambac-50n16	2	same	143004	1	+	Contig Start	breambac-50n16.f
breambac-50n16.r	Ga_group_01	81.77	203	25	4	10	212	1.82373e+07	1.82371e+07	6e-36	155			breambac-50n16	2	same	143004	-1	+	Contig End	breambac-50n16.r
breambac-40h6.r	Ga_group_01	85.12	121	14	3	262	382	1.83392e+07	1.83393e+07	4e-21	106			breambac-40h6	2	same	81438.1	1	+	Contig Start	breambac-40h6.r
breambac-61c22.f	Ga_group_01	71.67	120	33	1	379	498	1.83432e+07	1.83431e+07	1e-11	74.5			breambac-61c22	2	same	5.87775e+06	-1	-
breambac-25l21.r	Ga_group_01	76.47	85	20	0	190	274	1.84054e+07	18405439	4e-11	72.9			breambac-25l21	2	same	3309671	1	-
breambac-40h6.f	Ga_group_01	87	446	49	4	238	680	18420638	1.84203e+07	3e-132	475			breambac-40h6	2	same	81438.1	-1	+	Contig End	breambac-40h6.f
breambac-126p5.f	Ga_group_01	75.36	69	17	0	2	70	1.85242e+07	18524164	1e-06	57.1			breambac-126p5	2	same	42379.9	-1	-
breambac-126p5.r	Ga_group_01	86	150	19	2	443	591	1.85664e+07	1.85665e+07	2e-35	153			breambac-126p5	2	same	42379.9	1	-
breambac-97j19.f	Ga_group_01	86.19	543	60	4	1	538	1.85698e+07	1.85703e+07	2e-161	572			breambac-97j19	2	same	59583.1	1	+	Contig Start	breambac-97j19.f
breambac-97j19.r	Ga_group_01	91.23	114	9	1	550	662	1.86294e+07	1.86293e+07	1e-31	141			breambac-97j19	2	same	59583.1	-1	+	Contig End	breambac-97j19.r
breambac-33d19.r	Ga_group_01	83.09	473	60	4	20	473	1.86365e+07	1.86369e+07	7e-120	434			breambac-33d19	2	same	77823.5	1	+	Contig Start	breambac-33d19.r
breambac-23m9.r	Ga_group_01	74.76	206	49	2	510	712	1.8699e+07	1.86992e+07	5e-32	142	5		breambac-23m9	2	same	1.19805e+07	1	-
breambac-33d19.f	Ga_group_01	89.72	749	46	8	2	735	1.87143e+07	1.87136e+07	0	811			breambac-33d19	2	same	77823.5	-1	+	Contig End	breambac-33d19.f
breambac-135k17.f	Ga_group_01	91.13	417	28	3	1	410	1.8727e+07	1.87274e+07	2e-137	492			breambac-135k17	2	same	60741.4	1	+	Contig Start	breambac-135k17.f
breambac-18h5.r	Ga_group_01	78.95	114	24	0	465	578	1.87285e+07	1.87286e+07	3e-21	106			breambac-18h5	2	same	59226.2	1	+
breambac-99i1.f	Ga_group_01	84.95	93	13	1	465	556	1.87293e+07	18729240	1e-17	95.1	5		breambac-99i1	2	same	1.19187e+07	-1	-
breambac-71h19.r	Ga_group_01	84.71	569	61	7	22	585	1.8786e+07	1.87865e+07	5e-149	530			breambac-71h19	2	same	85278.2	1	+	MAX	breambac-71h19.r
breambac-18h5.f	Ga_group_01	80.47	169	30	1	167	332	1.87878e+07	1.87876e+07	4e-35	152			breambac-18h5	2	same	59226.2	-1	+
breambac-135k17.r	Ga_group_01	80.47	169	30	1	131	296	1.87878e+07	1.87876e+07	6e-35	152			breambac-135k17	2	same	60741.4	-1	+		breambac-135k17.r
breambac-71h19.f	Ga_group_01	79.03	453	67	9	15	444	1.88712e+07	1.88709e+07	3e-80	302			breambac-71h19	2	same	85278.2	-1	+	Contig End	breambac-71h19.f
breambac-65i17.r	Ga_group_01	92.95	156	10	1	295	450	19102573	1.91027e+07	7e-51	204			breambac-65i17	2	same	130313	1	+	Contig Start	breambac-65i17.r
breambac-24b24.r	Ga_group_01	74.29	280	65	4	79	358	1.91512e+07	1.91514e+07	6e-42	174			breambac-24b24	2	same	2.806e+06	1	+
breambac-65i17.f	Ga_group_01	85.48	372	45	2	138	500	1.92329e+07	1.92326e+07	4e-98	361			breambac-65i17	2	same	130313	-1	+	Contig End	breambac-65i17.f
breambac-20i14.f	Ga_group_01	92.52	107	8	0	561	667	1.92554e+07	1.92555e+07	5e-33	145			breambac-20i14	2	same	52292.6	1	+	Contig Start	breambac-20i14.f
breambac-20i14.r	Ga_group_01	87.34	316	30	3	1	306	1.93077e+07	1.93074e+07	2e-90	336			breambac-20i14	2	same	52292.6	-1	+	Contig End	breambac-20i14.r
breambac-112m12.r	Ga_group_01	68	125	33	2	418	539	1.94563e+07	1.94562e+07	0.005	46			breambac-112m12	2	same	1.42116e+07	-1	-
breambac-42f19.f	Ga_group_01	76.83	82	19	0	113	194	1.94807e+07	1.94808e+07	1e-10	71.3			breambac-42f19	2	same	1.86663e+07	1	-
breambac-91n10.r	Ga_group_01	83.33	72	12	0	228	299	1.94957e+07	1.94956e+07	1e-12	77.7			breambac-91n10	2	same	1.75193e+07	-1	-
breambac-112i12.f	Ga_group_01	93.42	152	10	0	296	447	1.95492e+07	1.95494e+07	2e-52	210			breambac-112i12	2	same	51991.8	1	+	Contig Start	breambac-112i12.f
breambac-38m20.f	Ga_group_01	71.79	78	22	0	81	158	1.95572e+07	1.95573e+07	8e-06	55.5			breambac-38m20	2	same	1.15773e+07	1	-
breambac-112i12.r	Ga_group_01	80.77	78	15	0	607	684	1.96012e+07	1.96012e+07	2e-12	77.7			breambac-112i12	2	same	51991.8	-1	+	Contig End	breambac-112i12.r
breambac-106j23.f	Ga_group_01	82.04	167	17	2	200	366	1.96016e+07	1.96017e+07	9e-30	134			breambac-106j23	2	same	35949.7	1	+	Contig Start	breambac-106j23.f
breambac-137k17.f	Ga_group_01	82.04	167	17	2	199	365	1.96016e+07	1.96017e+07	1e-29	134			breambac-137k17	2	same	35949.7	1	+
breambac-134g13.r	Ga_group_01	83.94	193	31	0	493	685	1.96098e+07	19610033	4e-52	209			breambac-134g13	2	same	27662.1	1	+	MAX	breambac-134g13.r
breambac-29k24.r	Ga_group_01	87.5	144	18	0	575	718	1.96314e+07	1.96315e+07	4e-41	172			breambac-29k24	2	same	1.63314e+07	1	-
breambac-134g13.f	Ga_group_01	78.69	183	35	2	228	408	1.96375e+07	1.96374e+07	6e-33	145			breambac-134g13	2	same	27662.1	-1	+	Contig End	breambac-134g13.f
breambac-106j23.r	Ga_group_01	78.69	183	35	2	187	367	1.96375e+07	1.96374e+07	5e-33	145			breambac-106j23	2	same	35949.7	-1	+		breambac-106j23.r
breambac-137k17.r	Ga_group_01	82.26	186	23	3	195	375	1.96375e+07	1.96374e+07	8e-35	152			breambac-137k17	2	same	35949.7	-1	+
breambac-77o22.r	Ga_group_01	78.9	109	23	0	3	111	2.0032e+07	2.00321e+07	1e-19	101			breambac-77o22	2	same	143866	1	+	Contig Start	breambac-77o22.r
breambac-20a12.r	Ga_group_01	91.43	105	7	1	120	222	2.00561e+07	2.00562e+07	1e-27	128			breambac-20a12	2	same	114093	1	+
breambac-144b12.r	Ga_group_01	82.04	373	56	3	282	649	2.00774e+07	2.0077e+07	3e-91	339	11		breambac-144b12	2	same	5.56013e+06	-1	-
breambac-99d21.f	Ga_group_01	89.59	221	23	0	372	592	2.00774e+07	2.00771e+07	4e-73	278	11		breambac-99d21	2	same	5.57248e+06	-1	-
breambac-127l13.f	Ga_group_01	80.21	283	43	5	1	279	2.00886e+07	2.00888e+07	3e-49	199			breambac-127l13	2	same	102588	1	+
breambac-56a9.r	Ga_group_01	81.34	134	25	0	438	571	2.00893e+07	2.00894e+07	1e-29	134			breambac-56a9	2	same	80910.6	1	+
breambac-49d4.f	Ga_group_01	82.47	194	32	1	92	283	2.00977e+07	2.00975e+07	3e-41	172	11		breambac-49d4	2	same	5.53938e+06	-1	-
breambac-97c10.r	Ga_group_01	72.21	349	72	6	16	355	2.00982e+07	2.00984e+07	2e-37	160			breambac-97c10	2	same	70322.2	1	+
breambac-35e24.f	Ga_group_01	75.32	385	81	6	267	651	20101856	2.01016e+07	1e-61	240	11		breambac-35e24	2	same	5.50158e+06	-1	-
breambac-26n17.f	Ga_group_01	80	155	24	3	511	661	2.01066e+07	2.01065e+07	2e-23	114	11		breambac-26n17	2	same	5.49627e+06	-1	-
breambac-136l5.f	Ga_group_01	78.79	132	23	2	513	642	2.01066e+07	20106504	9e-19	98.3	11		breambac-136l5	2	same	5.49852e+06	-1	-
breambac-93o3.r	Ga_group_01	88.52	183	21	0	93	275	2.01092e+07	2.01094e+07	8e-57	225			breambac-93o3	2	same	101902	1	+	MAX	breambac-93o3.r
breambac-97c10.f	Ga_group_01	88.76	169	15	1	273	437	2.01685e+07	2.01683e+07	6e-48	194			breambac-97c10	2	same	70322.2	-1	+
breambac-56a9.f	Ga_group_01	75.12	217	42	4	374	582	2.01702e+07	2.01701e+07	2e-26	123			breambac-56a9	2	same	80910.6	-1	+
breambac-20a12.f	Ga_group_01	75.12	217	42	4	411	619	2.01702e+07	2.01701e+07	3e-26	123			breambac-20a12	2	same	114093	-1	+
breambac-77o22.f	Ga_group_01	85.77	246	34	1	24	269	2.01758e+07	2.01756e+07	4e-68	261			breambac-77o22	2	same	143866	-1	+		breambac-77o22.f
breambac-28k7.r	Ga_group_01	72.6	365	88	5	200	556	2.01843e+07	2.01846e+07	9e-51	204			breambac-28k7	2	same	92746.5	1	+	MAX	breambac-28k7.r
breambac-127l13.r	Ga_group_01	87.72	464	41	4	2	449	20191153	20190703	2e-139	499			breambac-127l13	2	same	102588	-1	+
breambac-93o3.f	Ga_group_01	72.35	264	59	3	60	320	2.02111e+07	2.02108e+07	3e-32	142			breambac-93o3	2	same	101902	-1	+		breambac-93o3.f
breambac-141n24.f	Ga_group_01	67.89	190	53	4	246	435	2.02233e+07	20223463	9e-09	65			breambac-141n24	2	same	70248.4	1	+
breambac-38k14.r	Ga_group_01	81.61	348	54	5	245	591	2.02541e+07	2.02544e+07	6e-78	294			breambac-38k14	2	same	76874.6	1	+	MAX	breambac-38k14.r
breambac-28k7.f	Ga_group_01	87.45	231	29	0	1	231	2.0277e+07	2.02768e+07	4e-72	275			breambac-28k7	2	same	92746.5	-1	+		breambac-28k7.f
breambac-141n24.r	Ga_group_01	80.9	267	50	1	293	559	2.02936e+07	2.02934e+07	2e-65	253			breambac-141n24	2	same	70248.4	-1	+
breambac-38k14.f	Ga_group_01	93.4	470	25	3	8	476	2.0331e+07	2.03306e+07	2e-169	599			breambac-38k14	2	same	76874.6	-1	+	Contig End	breambac-38k14.f
breambac-119d5.r	Ga_group_01	86.12	418	25	9	137	547	2.03394e+07	2.03398e+07	2e-96	356			breambac-119d5	2	same	69254.8	1	+	Contig Start	breambac-119d5.r
breambac-48o7.r	Ga_group_01	83.33	306	32	3	333	637	20342865	2.03431e+07	6e-68	261			breambac-48o7	2	same	124697	1	+	MAX	breambac-48o7.r
breambac-119d5.f	Ga_group_01	83.82	136	21	1	226	360	2.04087e+07	2.04086e+07	1e-30	137			breambac-119d5	2	same	69254.8	-1	+		breambac-119d5.f
breambac-106p7.f	Ga_group_01	87.54	289	33	1	1	286	2.04254e+07	2.04256e+07	1e-89	332			breambac-106p7	2	same	63814.5	1	+
breambac-109b16.f	Ga_group_01	88.24	289	31	1	1	286	2.04254e+07	2.04256e+07	2e-91	339			breambac-109b16	2	same	63814.5	1	+
breambac-15d12.f	Ga_group_01	88.24	289	31	1	1	286	2.04254e+07	2.04256e+07	2e-91	339			breambac-15d12	2	same	63814.5	1	+
breambac-12m6.f	Ga_group_01	88.24	289	31	1	1	286	2.04254e+07	2.04256e+07	2e-91	339			breambac-12m6	2	same	92200.6	1	+	MAX	breambac-12m6.f
breambac-48o7.f	Ga_group_01	84.11	214	24	2	24	237	2.04676e+07	2.04674e+07	8e-50	201			breambac-48o7	2	same	124697	-1	+		breambac-48o7.f
breambac-34f18.f	Ga_group_01	80.1	206	34	2	1	206	2.04757e+07	2.04759e+07	1e-40	171			breambac-34f18	2	same	70874.5	1	+
breambac-112k10.r	Ga_group_01	81.32	182	29	4	189	368	2.04774e+07	2.04776e+07	3e-32	142			breambac-112k10	2	same	77247.5	1	+
breambac-37d18.f	Ga_group_01	77.34	128	27	1	603	728	2.04781e+07	2.0478e+07	1e-19	101			breambac-37d18	2	same	1.63038e+07	-1	+
breambac-106p7.r	Ga_group_01	80.16	126	24	1	480	604	2.04892e+07	2.04891e+07	5e-23	112			breambac-106p7	2	same	63814.5	-1	+
breambac-109b16.r	Ga_group_01	85.86	99	14	0	481	579	2.04892e+07	2.04891e+07	1e-23	114			breambac-109b16	2	same	63814.5	-1	+
breambac-15d12.r	Ga_group_01	84.26	108	17	0	482	589	2.04892e+07	2.04891e+07	2e-25	120			breambac-15d12	2	same	63814.5	-1	+
breambac-132h24.f	Ga_group_01	77.12	153	21	2	543	681	2.04903e+07	2.04904e+07	1e-17	95.1			breambac-132h24	2	same	56312.5	1	+
breambac-100i4.f	Ga_group_01	76.97	152	21	2	544	681	2.04903e+07	2.04904e+07	3e-17	93.5			breambac-100i4	2	same	64386.3	1	+
breambac-29i5.r	Ga_group_01	77.99	677	122	8	17	673	2.05168e+07	2.05173e+07	3e-133	478			breambac-29i5	2	same	87620.1	1	+	MAX	breambac-29i5.r
breambac-12m6.r	Ga_group_01	79.38	194	39	1	494	687	2.05176e+07	20517442	1e-41	174			breambac-12m6	2	same	92200.6	-1	+		breambac-12m6.r
breambac-10m3.f	Ga_group_01	75.74	169	36	3	403	569	2.05235e+07	2.05236e+07	1e-21	107			breambac-10m3	2	same	65275.2	1	+
breambac-118f11.r	Ga_group_01	77.88	208	36	4	6	204	2.05378e+07	2.05379e+07	1e-30	137			breambac-118f11	2	same	52421.3	1	+
breambac-4j5.r	Ga_group_01	73.68	190	40	3	1	182	2.05378e+07	2.05379e+07	1e-20	104			breambac-4j5	2	same	89633	1	+
breambac-132h24.r	Ga_group_01	82.34	368	62	3	18	384	2.05466e+07	2.05463e+07	7e-95	350			breambac-132h24	2	same	56312.5	-1	+
breambac-34f18.r	Ga_group_01	82.34	368	62	3	12	378	2.05466e+07	2.05463e+07	7e-95	350			breambac-34f18	2	same	70874.5	-1	+
breambac-50n10.f	Ga_group_01	94.76	267	14	0	374	640	2.05468e+07	2.0547e+07	1e-103	380			breambac-50n10	2	same	42000.4	1	+
breambac-144k5.f	Ga_group_01	84.98	466	49	3	63	516	2.05468e+07	2.05471e+07	6e-128	461			breambac-144k5	2	same	57671.7	1	+
breambac-100i4.r	Ga_group_01	79.13	369	56	6	375	723	2.05547e+07	2.05544e+07	8e-68	261			breambac-100i4	2	same	64386.3	-1	+
breambac-112k10.f	Ga_group_01	76.2	437	79	7	390	802	2.05547e+07	2.05544e+07	1e-70	271			breambac-112k10	2	same	77247.5	-1	+
breambac-126a12.f	Ga_group_01	83.94	137	17	3	1	137	2.05551e+07	2.05552e+07	2e-24	117			breambac-126a12	2	same	74019.5	1	+	MAX	breambac-126a12.f
breambac-50n10.r	Ga_group_01	79.05	463	72	8	261	711	2.05888e+07	2.05884e+07	6e-87	324			breambac-50n10	2	same	42000.4	-1	+
breambac-10m3.r	Ga_group_01	78.49	423	72	7	272	682	2.05888e+07	2.05884e+07	7e-79	297			breambac-10m3	2	same	65275.2	-1	+
breambac-118f11.f	Ga_group_01	88.52	209	24	0	7	215	2.05902e+07	2.059e+07	2e-66	256			breambac-118f11	2	same	52421.3	-1	+
breambac-144k5.r	Ga_group_01	76.47	374	77	2	378	741	2.06044e+07	20604147	2e-74	283			breambac-144k5	2	same	57671.7	-1	+
breambac-29i5.f	Ga_group_01	81.6	125	23	0	403	527	2.06044e+07	2.06043e+07	2e-27	126			breambac-29i5	2	same	87620.1	-1	+		breambac-29i5.f
breambac-85j14.f	Ga_group_01	85.81	712	78	10	1	700	2.06055e+07	2.06061e+07	0	694			breambac-85j14	2	same	61239.8	1	+
breambac-38n4.r	Ga_group_01	85.19	655	72	7	1	639	2.0618e+07	2.06186e+07	7e-173	610			breambac-38n4	2	same	76637.2	1	+	MAX	breambac-38n4.r
breambac-4j5.f	Ga_group_01	77.38	84	19	0	216	299	2.06274e+07	20627356	8e-12	74.5			breambac-4j5	2	same	89633	-1	+
breambac-126a12.r	Ga_group_01	79.87	298	51	2	302	590	2.06291e+07	2.06289e+07	1e-65	253			breambac-126a12	2	same	74019.5	-1	+		breambac-126a12.r
breambac-85j14.r	Ga_group_01	87.29	354	37	4	271	619	2.06667e+07	2.06664e+07	3e-102	375			breambac-85j14	2	same	61239.8	-1	+
breambac-26f11.f	Ga_group_01	89.14	313	25	5	363	674	2.06668e+07	2.0667e+07	6e-88	328			breambac-26f11	2	same	56503.9	1	+	MAX	breambac-26f11.f
breambac-38n4.f	Ga_group_01	76.24	303	64	3	104	406	2.06946e+07	2.06944e+07	2e-54	217			breambac-38n4	2	same	76637.2	-1	+		breambac-38n4.f
breambac-3p13.r	Ga_group_01	88.03	117	14	0	137	253	2.07104e+07	2.07105e+07	2e-32	142			breambac-3p13	2	same	63635.2	1	+
breambac-15n19.f	Ga_group_01	76.86	229	52	1	1	228	2.07228e+07	2.0723e+07	1e-45	187			breambac-15n19	2	same	101613	1	+	MAX	breambac-15n19.f
breambac-26f11.r	Ga_group_01	72.46	207	51	1	39	239	2.07233e+07	2.07231e+07	5e-29	131			breambac-26f11	2	same	56503.9	-1	+		breambac-26f11.r
breambac-136f18.f	Ga_group_01	80.36	168	19	6	573	726	2.07635e+07	2.07637e+07	3e-17	93.5			breambac-136f18	2	same	80928.7	1	+	MAX	breambac-136f18.f
breambac-61n7.f	Ga_group_01	78.57	140	20	2	572	701	2.07635e+07	2.07636e+07	3e-18	96.7			breambac-61n7	2	same	80928.7	1	+
breambac-3p13.f	Ga_group_01	89.36	141	14	1	1	140	2.0774e+07	2.07739e+07	7e-40	168			breambac-3p13	2	same	63635.2	-1	+
breambac-15n19.r	Ga_group_01	84.47	161	25	0	315	475	2.08244e+07	2.08243e+07	1e-42	177			breambac-15n19	2	same	101613	-1	+		breambac-15n19.r
breambac-136f18.r	Ga_group_01	68.74	451	122	7	320	751	2.08445e+07	2.08441e+07	3e-47	193			breambac-136f18	2	same	80928.7	-1	+	Contig End	breambac-136f18.r
breambac-61n7.r	Ga_group_01	81.06	227	34	2	311	528	2.08445e+07	2.08443e+07	7e-28	128			breambac-61n7	2	same	80928.7	-1	+
breambac-35b15.r	Ga_group_01	89.96	239	21	3	354	590	2.08447e+07	2.08449e+07	5e-66	255			breambac-35b15	2	same	74717.5	1	+	Contig Start	breambac-35b15.r
breambac-40d5.f	Ga_group_01	89.96	239	21	3	354	590	2.08447e+07	2.08449e+07	5e-66	255			breambac-40d5	2	same	74717.5	1	+
breambac-133o7.r	Ga_group_01	74.68	79	19	1	194	271	2.08964e+07	2.08964e+07	2e-05	53.9			breambac-133o7	2	same	51243.8	1	+	MAX	breambac-133o7.r
breambac-35b15.f	Ga_group_01	80.29	208	33	1	303	510	20919401	2.09192e+07	2e-43	180			breambac-35b15	2	same	74717.5	-1	+		breambac-35b15.f
breambac-40d5.r	Ga_group_01	80.29	208	33	1	303	510	20919401	2.09192e+07	2e-43	180			breambac-40d5	2	same	74717.5	-1	+
breambac-78a11.f	Ga_group_01	78.51	121	25	1	388	507	2.09199e+07	2.092e+07	3e-20	103			breambac-78a11	2	same	126331	1	+	MAX	breambac-78a11.f
breambac-143g17.f	Ga_group_01	81.18	271	41	4	388	648	2.09199e+07	2.09201e+07	2e-56	223			breambac-143g17	2	same	1.63886e+07	1	-
breambac-144c11.f	Ga_group_01	82.88	111	19	0	84	194	2.09441e+07	2.09442e+07	2e-24	117			breambac-144c11	2	same	74779.2	1	+
breambac-133o7.f	Ga_group_01	88.62	378	38	5	34	407	2.09476e+07	2.09473e+07	2e-106	389			breambac-133o7	2	same	51243.8	-1	+		breambac-133o7.f
breambac-108n23.r	Ga_group_01	90.11	647	64	0	3	649	2.09578e+07	2.09583e+07	0	824			breambac-108n23	2	same	69087.8	1	+
breambac-65a23.f	Ga_group_01	92.31	156	12	0	2	157	2.0968e+07	2.09681e+07	1e-52	210			breambac-65a23	2	same	68419.4	1	+
breambac-37f17.f	Ga_group_01	78.82	85	15	2	504	585	20974595	20974679	7e-07	58.6			breambac-37f17	2	same	56306	1	+
breambac-114j1.r	Ga_group_01	79.77	529	80	9	190	708	2.0975e+07	2.0975e+07	4e-105	385			breambac-114j1	2	same	50737.8	1	+
breambac-144c11.r	Ga_group_01	77.42	248	47	4	412	659	2.10189e+07	2.10187e+07	1e-40	171			breambac-144c11	2	same	74779.2	-1	+
breambac-114j1.f	Ga_group_01	67.86	140	42	1	350	486	21025761	2.10257e+07	1e-09	68.2			breambac-114j1	2	same	50737.8	-1	+
breambac-108n23.f	Ga_group_01	73.9	295	70	5	192	482	2.10269e+07	2.10267e+07	1e-41	174			breambac-108n23	2	same	69087.8	-1	+
breambac-37f17.r	Ga_group_01	67.24	116	38	0	9	124	21030901	21030786	9e-09	65			breambac-37f17	2	same	56306	-1	+
breambac-59p16.r	Ga_group_01	94.31	123	7	0	358	480	2.1031e+07	2.10311e+07	1e-41	174	12		breambac-59p16	2	same	2.15907e+06	1	+
breambac-65a23.r	Ga_group_01	88.73	204	21	2	9	210	2.10364e+07	2.10362e+07	2e-59	232			breambac-65a23	2	same	68419.4	-1	+
breambac-78a11.r	Ga_group_01	86.38	213	27	1	469	681	2.10462e+07	2.1046e+07	3e-60	236			breambac-78a11	2	same	126331	-1	+	Contig End	breambac-78a11.r
breambac-126o6.r	Ga_group_01	82.81	128	22	0	307	434	2.10528e+07	2.10529e+07	1e-29	134	12		breambac-126o6	2	same	2.15267e+06	1	+
breambac-124e22.f	Ga_group_01	83.33	246	38	1	417	662	2.10646e+07	2.10648e+07	5e-64	248	12		breambac-124e22	2	same	2.15791e+06	1	+
breambac-95d17.f	Ga_group_01	82.39	176	28	1	417	592	2.10646e+07	2.10648e+07	3e-40	169	12		breambac-95d17	2	same	2.17234e+06	1	+
breambac-41j21.r	Ga_group_01	81.56	244	36	3	257	494	2.10831e+07	2.10834e+07	1e-51	207	12		breambac-41j21	2	same	2140113	1	+
breambac-110k1.f	Ga_group_01	89.04	228	25	0	236	463	2.11411e+07	2.11409e+07	2e-74	283			breambac-110k1	2	same	6.81571e+06	-1	-
breambac-141e3.f	Ga_group_01	77.26	321	63	5	247	564	2.11597e+07	2.116e+07	2e-56	223			breambac-141e3	2	same	57864.1	1	+	Contig Start	breambac-141e3.f
breambac-120j10.r	Ga_group_01	82.95	522	70	7	91	601	2.11705e+07	2.117e+07	5e-128	461			breambac-120j10	2	same	3.84586e+06	-1	-
breambac-40o15.r	Ga_group_01	80.79	151	25	3	591	740	2.12097e+07	2.12099e+07	7e-25	118			breambac-40o15	2	same	52891.2	1	+	MAX	breambac-40o15.r
breambac-141e3.r	Ga_group_01	88.52	244	24	2	64	306	2.12176e+07	21217402	1e-72	277			breambac-141e3	2	same	57864.1	-1	+		breambac-141e3.r
breambac-40o15.f	Ga_group_01	93.25	504	28	4	66	568	2.12626e+07	2.12622e+07	0	653			breambac-40o15	2	same	52891.2	-1	+	Contig End	breambac-40o15.f
breambac-108c14.f	Ga_group_01	89.52	124	12	1	526	649	2.12769e+07	2.1277e+07	1e-33	147			breambac-108c14	2	same	65125.7	1	+	Contig Start	breambac-108c14.f
breambac-106c6.r	Ga_group_01	89.19	370	28	2	342	709	2.12769e+07	2.12772e+07	2e-117	426			breambac-106c6	2	same	65124.9	1	+
breambac-112a14.f	Ga_group_01	69.49	839	205	15	1	817	2.12857e+07	21286169	2e-85	320			breambac-112a14	2	same	55133.1	1	+
breambac-136g19.r	Ga_group_01	84.06	69	11	0	678	746	2.13173e+07	2.13174e+07	6e-12	76.1			breambac-136g19	2	same	60801.9	1	+
breambac-83e22.f	Ga_group_01	74.7	253	58	4	221	472	2.13319e+07	2.1332e+07	7e-37	158			breambac-83e22	2	same	45061.6	1	+
breambac-8p3.f	Ga_group_01	78.92	702	127	9	7	699	2.13362e+07	2.13368e+07	2e-149	532			breambac-8p3	2	same	58092.8	1	+	MAX	breambac-8p3.f
breambac-112a14.r	Ga_group_01	73.78	225	49	4	42	263	2.13408e+07	2.13406e+07	2e-26	123			breambac-112a14	2	same	55133.1	-1	+
breambac-106c6.f	Ga_group_01	74.44	356	71	5	296	647	2.1342e+07	21341772	9e-50	201			breambac-106c6	2	same	65124.9	-1	+
breambac-108c14.r	Ga_group_01	77.26	409	74	5	280	684	2.1342e+07	2.13417e+07	4e-73	278			breambac-108c14	2	same	65125.7	-1	+		breambac-108c14.r
breambac-30b13.r	Ga_group_01	85.39	308	43	2	361	667	2.13427e+07	2.1343e+07	8e-88	328			breambac-30b13	2	same	56467.4	1	+	MAX	breambac-30b13.r
breambac-62d6.r	Ga_group_01	80.24	253	44	3	518	767	2.13614e+07	2.13616e+07	5e-53	212			breambac-62d6	2	same	53375.4	1	-
breambac-83e22.r	Ga_group_01	85.81	289	40	1	1	289	2.13769e+07	2.13767e+07	2e-85	320			breambac-83e22	2	same	45061.6	-1	+
breambac-136g19.f	Ga_group_01	79	200	32	3	1	200	2.13781e+07	2.1378e+07	5e-33	145			breambac-136g19	2	same	60801.9	-1	+
breambac-8p3.r	Ga_group_01	92.2	205	15	1	240	443	2.13943e+07	2.13942e+07	2e-69	266			breambac-8p3	2	same	58092.8	-1	+		breambac-8p3.r
breambac-30b13.f	Ga_group_01	71.78	411	94	7	441	831	2.13992e+07	2.13989e+07	1e-49	201			breambac-30b13	2	same	56467.4	-1	+	Contig End	breambac-30b13.f
breambac-65m13.f	Ga_group_01	83.84	396	60	4	231	625	2.14009e+07	2.14006e+07	4e-106	388			breambac-65m13	2	same	1.96636e+07	-1	+
breambac-8k2.f	Ga_group_01	81.01	574	83	11	1	557	21401133	2.14016e+07	6e-121	437			breambac-8k2	2	same	60905.2	1	+	Contig Start	breambac-8k2.f
breambac-35n21.r	Ga_group_01	74.56	114	26	2	53	166	21404471	21404581	3e-10	69.7			breambac-35n21	2	same	52079	1	+
breambac-62d6.f	Ga_group_01	78.36	171	33	3	399	566	2.14147e+07	2.14148e+07	7e-27	125			breambac-62d6	2	same	53375.4	1	-
breambac-63b18.r	Ga_group_01	70.26	454	120	8	95	537	2.14232e+07	2.14236e+07	3e-51	206			breambac-63b18	2	same	40616.3	1	+
breambac-125f2.r	Ga_group_01	78.14	215	39	2	79	285	2.14444e+07	2.14445e+07	8e-39	164			breambac-125f2	2	same	46158	1	+	MAX	breambac-125f2.r
breambac-36k5.f	Ga_group_01	77.21	215	41	2	110	316	2.14444e+07	2.14445e+07	6e-37	158	13		breambac-36k5	2	same	981911	1	-
breambac-35n21.f	Ga_group_01	66.16	198	65	2	98	294	21456550	21456354	2e-14	84			breambac-35n21	2	same	52079	-1	+
breambac-132b4.f	Ga_group_01	74.37	277	59	6	87	352	2.1457e+07	2.14572e+07	5e-34	148	13		breambac-132b4	2	same	955968	1	-
breambac-8k2.r	Ga_group_01	75.59	299	56	3	189	477	2.1462e+07	2.14618e+07	2e-49	199			breambac-8k2	2	same	60905.2	-1	+		breambac-8k2.r
breambac-63b18.f	Ga_group_01	87.77	139	15	1	473	611	2.14638e+07	2.14637e+07	2e-36	156			breambac-63b18	2	same	40616.3	-1	+
breambac-125f2.f	Ga_group_01	93.65	189	12	0	129	317	2.14905e+07	2.14904e+07	2e-68	263			breambac-125f2	2	same	46158	-1	+	Contig End	breambac-125f2.f
breambac-16d15.f	Ga_group_01	92.68	41	3	0	421	461	2.14925e+07	2.14925e+07	2e-06	57.1			breambac-16d15	2	same	6325492	-1	-
breambac-51p6.r	Ga_group_01	86.05	172	14	4	116	280	2.15132e+07	2.15133e+07	1e-34	150			breambac-51p6	2	same	73424.4	1	+	Contig Start	breambac-51p6.r
breambac-39k9.f	Ga_group_01	87.21	172	12	4	157	321	2.15132e+07	2.15133e+07	2e-36	156			breambac-39k9	2	same	57425.9	1	-
breambac-113m16.r	Ga_group_01	88.59	368	26	4	298	659	2.15236e+07	2.15233e+07	6e-108	394	13		breambac-113m16	2	same	973413	-1	-
breambac-105j3.r	Ga_group_01	80.72	389	63	4	1	389	2.15249e+07	21524493	1e-88	329	13		breambac-105j3	2	same	1.01196e+06	-1	-
breambac-111h4.f	Ga_group_01	76.4	356	66	6	246	594	2.15273e+07	2.15269e+07	2e-59	232	13		breambac-111h4	2	same	958565	-1	-
breambac-38g12.r	Ga_group_01	79.41	204	34	2	344	540	2.15281e+07	2.15283e+07	3e-38	163			breambac-38g12	2	same	58503	1	+
breambac-46a18.f	Ga_group_01	82.04	167	25	3	167	332	2.15284e+07	2.15286e+07	4e-31	139			breambac-46a18	2	same	63664.1	1	+
breambac-37c14.f	Ga_group_01	87.65	429	48	2	343	767	21535411	2.1535e+07	1e-135	486	13		breambac-37c14	2	same	973517	-1	-
breambac-2p15.f	Ga_group_01	89.66	145	14	1	574	718	21539776	2.15399e+07	1e-41	174			breambac-2p15	2	same	64235.8	1	+
breambac-3i3.r	Ga_group_01	78.05	328	57	5	156	468	2.15442e+07	2.15439e+07	1e-56	223	13		breambac-3i3	2	same	920674	-1	-
breambac-80k20.r	Ga_group_01	78.74	348	59	5	155	487	2.15442e+07	2.15439e+07	4e-64	248	13		breambac-80k20	2	same	920721	-1	-
breambac-40i10.f	Ga_group_01	72.86	269	55	5	1	256	21545459	2.15457e+07	9e-28	128			breambac-40i10	2	same	70903.7	1	+	MAX	breambac-40i10.f
breambac-29e16.f	Ga_group_01	88.46	208	24	0	350	557	2.15484e+07	2.15485e+07	5e-66	255	14		breambac-29e16	2	same	932646	1	+
breambac-123g20.f	Ga_group_01	88.46	208	24	0	365	572	2.15484e+07	2.15485e+07	5e-66	255	14		breambac-123g20	2	same	937111	1	+
breambac-115m9.r	Ga_group_01	87.02	131	17	0	338	468	2.15484e+07	2.15483e+07	4e-36	155	13		breambac-115m9	2	same	916304	-1	-
breambac-10b13.f	Ga_group_01	75.61	205	43	2	226	423	2.15609e+07	2.15608e+07	1e-31	141	13		breambac-10b13	2	same	920282	-1	-
breambac-39k9.r	Ga_group_01	80.12	498	82	5	122	603	2.15702e+07	2.15706e+07	9e-113	410			breambac-39k9	2	same	57425.9	1	-
breambac-51p6.f	Ga_group_01	90.76	357	28	3	5	360	2.15866e+07	2.15863e+07	3e-119	431			breambac-51p6	2	same	73424.4	-1	+		breambac-51p6.f
breambac-38g12.f	Ga_group_01	90.91	363	28	3	1	362	2.15866e+07	2.15863e+07	4e-122	440			breambac-38g12	2	same	58503	-1	+
breambac-46a18.r	Ga_group_01	76.19	231	46	4	191	415	2.15921e+07	2.15919e+07	2e-33	147			breambac-46a18	2	same	63664.1	-1	+
breambac-2p15.r	Ga_group_01	74.74	380	91	1	21	400	2.1604e+07	2.16037e+07	2e-74	283			breambac-2p15	2	same	64235.8	-1	+
breambac-40i10.r	Ga_group_01	75.32	158	35	2	433	590	2.16164e+07	21616245	4e-21	106			breambac-40i10	2	same	70903.7	-1	+	Contig End	breambac-40i10.r
breambac-67h13.f	Ga_group_01	82.31	130	20	1	10	136	2.16306e+07	2.16307e+07	7e-26	122			breambac-67h13	2	same	97611.7	1	+	Contig Start	breambac-67h13.f
breambac-135b6.f	Ga_group_01	73.62	326	65	6	109	424	2.16362e+07	2.16365e+07	8e-39	164			breambac-135b6	2	same	77978.8	1	+
breambac-6e2.r	Ga_group_01	83.49	218	33	1	189	403	2.16418e+07	2.16419e+07	1e-55	220			breambac-6e2	2	same	72399.3	1	+
breambac-16o21.f	Ga_group_01	87.32	142	17	1	483	623	2.16689e+07	2.16691e+07	7e-38	161			breambac-16o21	2	same	72856.3	1	+
breambac-51p20.r	Ga_group_01	92.95	156	11	0	1	156	21670301	21670456	1e-53	213			breambac-51p20	2	same	50723	1	+
breambac-137m6.f	Ga_group_01	75	212	41	4	441	644	21672286	2.16724e+07	6e-25	118			breambac-137m6	2	same	82260.3	1	+
breambac-129l14.r	Ga_group_01	81.32	273	48	1	1	270	2.16845e+07	2.16847e+07	2e-67	259			breambac-129l14	2	same	60261.9	1	+
breambac-26j24.f	Ga_group_01	78.99	338	55	5	361	690	2.16884e+07	21688605	1e-63	247			breambac-26j24	2	same	53411.2	1	+
breambac-142g5.r	Ga_group_01	78.83	326	64	5	345	668	2.16884e+07	2.16886e+07	5e-65	252			breambac-142g5	2	same	53586.1	1	+
breambac-60c5.f	Ga_group_01	81.65	109	20	0	381	489	2.16884e+07	21688435	3e-23	112			breambac-60c5	2	same	68514.5	1	+
breambac-93k5.r	Ga_group_01	81.74	115	20	1	280	393	21696343	2.16964e+07	2e-21	107			breambac-93k5	2	same	52057.7	1	+
breambac-71b7.r	Ga_group_01	81.74	115	20	1	262	375	21696343	2.16964e+07	1e-21	107			breambac-71b7	2	same	52524.5	1	+
breambac-76k5.f	Ga_group_01	81.74	115	20	1	292	405	21696343	2.16964e+07	1e-21	107			breambac-76k5	2	same	80275.3	1	+
breambac-129e11.f	Ga_group_01	77.46	142	29	3	234	373	21713737	21713877	7e-19	98.3			breambac-129e11	2	same	64603	1	+
breambac-65l21.f	Ga_group_01	78.17	142	28	3	235	374	21713737	21713877	2e-19	99.9			breambac-65l21	2	same	81415	1	+	MAX	breambac-65l21.f
breambac-6e2.f	Ga_group_01	80.82	73	11	1	604	673	2.17142e+07	2.17141e+07	3e-07	60.2			breambac-6e2	2	same	72399.3	-1	+
breambac-135b6.r	Ga_group_01	80.88	68	10	1	577	641	2.17142e+07	2.17141e+07	7e-06	55.5			breambac-135b6	2	same	77978.8	-1	+
breambac-51p20.f	Ga_group_01	88.54	157	18	0	192	348	21721024	21720868	1e-32	144			breambac-51p20	2	same	50723	-1	+
breambac-67h13.r	Ga_group_01	91	200	18	0	368	567	2.17282e+07	2.17281e+07	7e-68	261			breambac-67h13	2	same	97611.7	-1	+		breambac-67h13.r
breambac-26j24.r	Ga_group_01	68.53	232	65	2	203	434	2.17418e+07	2.17416e+07	1e-23	114			breambac-26j24	2	same	53411.2	-1	+
breambac-16o21.r	Ga_group_01	71.09	256	66	2	232	487	2.17418e+07	2.17416e+07	4e-33	145			breambac-16o21	2	same	72856.3	-1	+
breambac-142g5.f	Ga_group_01	83.49	109	9	2	52	155	21741938	21741858	2e-15	87.2			breambac-142g5	2	same	53586.1	-1	+
breambac-129l14.f	Ga_group_01	76.47	204	37	4	220	414	2.17448e+07	2.17446e+07	4e-27	125			breambac-129l14	2	same	60261.9	-1	+
breambac-93k5.f	Ga_group_01	82.1	229	30	5	52	277	2.17484e+07	2.17482e+07	1e-42	177			breambac-93k5	2	same	52057.7	-1	+
breambac-53l16.f	Ga_group_01	76.58	363	78	5	51	411	2.17485e+07	2.17488e+07	2e-66	256			breambac-53l16	2	same	4.97823e+06	1	+
breambac-71b7.f	Ga_group_01	80.88	68	13	0	367	434	2.17489e+07	21748816	1e-09	68.2			breambac-71b7	2	same	52524.5	-1	+
breambac-137m6.r	Ga_group_01	73.55	397	89	5	151	538	2.17545e+07	2.17542e+07	3e-78	296			breambac-137m6	2	same	82260.3	-1	+
breambac-60c5.r	Ga_group_01	80.47	128	25	0	435	562	2.17569e+07	2.17568e+07	6e-27	125			breambac-60c5	2	same	68514.5	-1	+
breambac-76k5.r	Ga_group_01	89.44	161	16	1	193	353	2.17766e+07	2.17766e+07	2e-47	193			breambac-76k5	2	same	80275.3	-1	+
breambac-43p11.f	Ga_group_01	78.81	118	17	2	248	358	21777156	2.17772e+07	9e-14	80.8			breambac-43p11	2	same	71025.5	1	+	MAX	breambac-43p11.f
breambac-129e11.r	Ga_group_01	74.13	143	35	1	445	585	21778340	21778198	4e-14	82.4			breambac-129e11	2	same	64603	-1	+
breambac-65l21.r	Ga_group_01	75.27	93	20	1	388	480	21795152	21795063	1e-07	60.2			breambac-65l21	2	same	81415	-1	+		breambac-65l21.r
breambac-63g15.r	Ga_group_01	84.73	524	58	8	172	687	2.17953e+07	2.17958e+07	4e-125	451			breambac-63g15	2	same	87456.8	1	+
breambac-37j15.r	Ga_group_01	93.85	65	3	1	1	64	21796965	2.1797e+07	6e-14	82.4			breambac-37j15	2	same	81784.5	1	+
breambac-32h5.r	Ga_group_01	85.87	184	24	1	561	744	2.17998e+07	2.17997e+07	7e-46	188			breambac-32h5	2	same	93051.2	-1	-
breambac-11j24.f	Ga_group_01	77.69	242	42	5	334	568	2.18183e+07	2.18185e+07	7e-36	155			breambac-11j24	2	same	74382.2	1	+
breambac-93i13.rb120_b1.SCF	Ga_group_01	85.42	48	7	0	542	589	21818430	21818477	6e-06	55			breambac-93i13	2	same	76392	1	+
breambac-20c17.r	Ga_group_01	80.57	247	23	3	494	716	2.18185e+07	2.18187e+07	4e-29	133			breambac-20c17	2	same	62078.2	1	+
breambac-22c21.r	Ga_group_01	85.49	193	25	2	367	559	2.18194e+07	2.18196e+07	1e-42	177			breambac-22c21	2	same	73286.5	1	+
breambac-42h11.r	Ga_group_01	91.13	564	42	6	6	567	2.18273e+07	2.18278e+07	0	670			breambac-42h11	2	same	73689.5	1	+	MAX	breambac-42h11.r
breambac-43p11.r	Ga_group_01	75	280	64	2	324	603	2.18482e+07	2.18474e+07	5e-34	148			breambac-43p11	2	same	71025.5	-1	+		breambac-43p11.r
breambac-37j15.f	Ga_group_01	76.79	56	13	0	486	541	2.18787e+07	2.18787e+07	0.0006	49.1			breambac-37j15	2	same	81784.5	-1	+
breambac-20c17.f	Ga_group_01	80.89	293	44	2	123	409	2.18806e+07	2.18804e+07	1e-65	253			breambac-20c17	2	same	62078.2	-1	+
breambac-63g15.f	Ga_group_01	86.15	361	38	3	365	716	2.18828e+07	2.18825e+07	3e-101	372			breambac-63g15	2	same	87456.8	-1	+
breambac-22c21.f	Ga_group_01	79.9	204	35	1	373	576	2.18927e+07	2.18926e+07	4e-42	175			breambac-22c21	2	same	73286.5	-1	+
breambac-11j24.r	Ga_group_01	72.28	368	76	5	343	710	2.18927e+07	2.18925e+07	5e-43	179			breambac-11j24	2	same	74382.2	-1	+
breambac-32h5.f	Ga_group_01	79.9	204	35	1	373	576	2.18927e+07	2.18926e+07	4e-42	175			breambac-32h5	2	same	93051.2	-1	-
breambac-92i3.f	Ga_group_01	84.88	86	10	1	177	262	2.18933e+07	2.18934e+07	2e-14	84			breambac-92i3	2	same	5.46525e+06	1	+
breambac-93i13.fb120_b1.SCF	Ga_group_01	60.85	258	91	5	273	521	21894822	21894566	1e-12	77			breambac-93i13	2	same	76392	-1	+
breambac-42h11.f	Ga_group_01	85.45	55	6	1	654	706	2.1901e+07	2.1901e+07	7e-05	52.3			breambac-42h11	2	same	73689.5	-1	+	Contig End	breambac-42h11.f
breambac-24b24.f	Ga_group_01	78.95	133	26	2	300	432	2.19572e+07	2.19571e+07	3e-18	96.7			breambac-24b24	2	same	2.806e+06	-1	+
breambac-17h22.f	Ga_group_01	77.6	250	55	1	1	250	2.19588e+07	2.19586e+07	1e-52	210			breambac-17h22	2	same	482821	-1	-
breambac-53j7.f	Ga_group_01	90.77	195	14	1	397	587	2.19619e+07	2.19617e+07	3e-58	229			breambac-53j7	2	same	4.75164e+06	-1	-
breambac-46o21.r	Ga_group_01	88.89	162	18	0	28	189	2.19633e+07	2.19632e+07	1e-49	201			breambac-46o21	2	same	487840	-1	-
breambac-112j17.r	Ga_group_01	80.71	700	91	12	20	687	2.19674e+07	2.19668e+07	2e-140	502			breambac-112j17	2	same	474631	-1	-
breambac-68o9.f	Ga_group_01	81	542	76	8	12	537	2.19674e+07	2.19669e+07	1e-115	420			breambac-68o9	2	same	474498	-1	-
breambac-87o18.r	Ga_group_01	79.77	346	63	3	139	478	2.19677e+07	2.1968e+07	2e-77	293			breambac-87o18	2	same	42022.1	1	+	Contig Start	breambac-87o18.r
breambac-10a23.r	Ga_group_01	80.25	324	62	2	138	460	2.19677e+07	2.1968e+07	1e-77	293			breambac-10a23	2	same	61639.5	1	+	MAX	breambac-10a23.r
breambac-87o18.f	Ga_group_01	88.41	276	27	4	439	712	2.20097e+07	2.20095e+07	8e-79	297			breambac-87o18	2	same	42022.1	-1	+		breambac-87o18.f
breambac-10a23.f	Ga_group_01	76.47	153	31	1	411	558	2.20294e+07	2.20292e+07	2e-23	114			breambac-10a23	2	same	61639.5	-1	+	Contig End	breambac-10a23.f
breambac-43b23.r	Ga_group_01	89.61	337	30	4	469	801	2.21193e+07	2.2119e+07	5e-105	385			breambac-43b23	2	same	833954	-1	-
breambac-29l8.r	Ga_group_01	79.25	53	11	0	664	716	22156639	22156691	0.0002	50.7			breambac-29l8	2	same	44912	1	+	Contig Start	breambac-29l8.r
breambac-13a17.f	Ga_group_01	87.76	49	6	0	212	260	2.21641e+07	2.21641e+07	3e-07	60.2			breambac-13a17	2	same	282259	-1	-
breambac-62d8.f	Ga_group_01	88.12	202	17	3	454	655	2.21828e+07	2.21829e+07	8e-48	194			breambac-62d8	2	same	61800.6	1	+
breambac-136j20.r	Ga_group_01	88.12	202	17	3	430	631	2.21828e+07	2.21829e+07	9e-48	194			breambac-136j20	2	same	63922.5	1	+
breambac-130i20.f	Ga_group_01	88.83	188	15	2	453	640	2.21828e+07	2.21829e+07	6e-47	191			breambac-130i20	2	same	77210.5	1	+
breambac-48h8.f	Ga_group_01	81.63	98	18	0	519	616	2.21847e+07	2.21848e+07	3e-19	99.9			breambac-48h8	2	same	56932.3	1	+
breambac-56g8.r	Ga_group_01	83.26	239	38	1	297	535	2.2189e+07	2.21892e+07	4e-62	242			breambac-56g8	2	same	42679.7	1	+
breambac-66e20.r	Ga_group_01	91.49	47	4	0	415	461	22194729	22194775	2e-08	63.4			breambac-66e20	2	same	77307	1	+	MAX	breambac-66e20.r
breambac-29l8.f	Ga_group_01	74.62	398	92	4	253	645	22201551	22201158	2e-69	266			breambac-29l8	2	same	44912	-1	+		breambac-29l8.f
breambac-129e14.f	Ga_group_01	76.84	393	70	6	115	503	22206204	22206579	5e-60	234			breambac-129e14	2	same	51599	1	+
breambac-15l23.f	Ga_group_01	82.19	668	96	4	78	735	2.22133e+07	2.221e+07	3e-174	614			breambac-15l23	2	same	47842.4	-1	-
breambac-56g8.f	Ga_group_01	89.69	194	19	1	150	343	2.22317e+07	2.22315e+07	3e-60	236			breambac-56g8	2	same	42679.7	-1	+
breambac-48h8.r	Ga_group_01	74.27	171	38	3	401	565	2.22417e+07	2.22415e+07	8e-19	98.3			breambac-48h8	2	same	56932.3	-1	+
breambac-62d8.r	Ga_group_01	85.67	307	24	7	373	670	2.22446e+07	2.22444e+07	2e-68	263			breambac-62d8	2	same	61800.6	-1	+
breambac-136j20.f	Ga_group_01	86.67	120	14	2	6	123	2.22467e+07	2.22466e+07	6e-26	122			breambac-136j20	2	same	63922.5	-1	+
breambac-129e14.r	Ga_group_01	75.41	122	25	1	494	610	22257803	22257682	2e-14	84			breambac-129e14	2	same	51599	-1	+
breambac-15l23.r	Ga_group_01	86.5	237	31	1	376	611	2.22578e+07	22257646	3e-69	266			breambac-15l23	2	same	47842.4	-1	-
breambac-130i20.r	Ga_group_01	77.24	290	46	6	111	396	2.226e+07	2.22598e+07	2e-33	147			breambac-130i20	2	same	77210.5	-1	+
breambac-66e20.f	Ga_group_01	73.37	368	89	4	19	385	22272036	22271677	4e-58	228			breambac-66e20	2	same	77307	-1	+	Contig End	breambac-66e20.f
breambac-57o18.f	Ga_group_01	86.36	88	12	0	187	274	2.23633e+07	2.23633e+07	3e-20	103			breambac-57o18	2	same	1.19508e+07	-1	+
breambac-132b4.r	Ga_group_01	84.58	201	31	0	278	478	2.24128e+07	2.2413e+07	6e-56	221	13		breambac-132b4	2	same	955968	1	-
breambac-36k5.r	Ga_group_01	75.44	57	14	0	200	256	2.24262e+07	22426275	0.0009	47.5	13		breambac-36k5	2	same	981911	1	-
breambac-68o9.r	Ga_group_01	75	324	76	3	185	507	2.24412e+07	2.24414e+07	2e-57	226			breambac-68o9	2	same	474498	1	-
breambac-112j17.f	Ga_group_01	75.39	317	73	3	209	524	2.24412e+07	2.24414e+07	8e-57	225			breambac-112j17	2	same	474631	1	-
breambac-139k22.r	Ga_group_01	77.65	264	57	2	3	265	2.24412e+07	2.24414e+07	1e-53	213			breambac-139k22	2	same	13743.7	1	+	Contig Start	breambac-139k22.r
breambac-17h22.r	Ga_group_01	76.89	264	59	2	3	265	2.24412e+07	2.24414e+07	9e-52	207			breambac-17h22	2	same	482821	1	-
breambac-37h21.r	Ga_group_01	77.99	209	45	1	1	209	2.24413e+07	2.24414e+07	1e-42	177			breambac-37h21	2	same	13701.4	1	+
breambac-108h6.f	Ga_group_01	85.33	225	32	1	442	666	2.24433e+07	2.24432e+07	1e-62	244			breambac-108h6	2	same	3175	-1	-
breambac-16d19.r	Ga_group_01	91.93	161	13	0	178	338	2.24462e+07	2.24463e+07	4e-54	215			breambac-16d19	2	same	123.077	1	+
breambac-93n13.f	Ga_group_01	91.3	161	14	0	211	371	2.24462e+07	2.24463e+07	3e-53	212			breambac-93n13	2	same	123.077	1	+
breambac-126l11.r	Ga_group_01	91.3	161	14	0	236	396	2.24462e+07	2.24463e+07	4e-53	212			breambac-126l11	2	same	4.39881e+06	1	-
breambac-98a12.f	Ga_group_01	91.93	161	13	0	243	403	2.24462e+07	2.24463e+07	3e-54	215			breambac-98a12	2	same	4.39881e+06	1	-
breambac-16d19.f	Ga_group_01	93.46	153	10	0	369	521	2.24463e+07	2.24462e+07	1e-53	213			breambac-16d19	2	same	123.077	-1	+
breambac-93n13.r	Ga_group_01	92.81	153	11	0	160	312	2.24463e+07	2.24462e+07	4e-52	209			breambac-93n13	2	same	123.077	-1	+
breambac-108h6.r	Ga_group_01	90.68	161	15	0	154	314	2.24463e+07	2.24462e+07	3e-52	209			breambac-108h6	2	same	3175	-1	-
breambac-13a17.r	Ga_group_01	91.3	161	14	0	353	513	2.24463e+07	2.24462e+07	5e-53	212			breambac-13a17	2	same	282259	-1	-
breambac-46o21.f	Ga_group_01	84	75	10	2	241	314	2.2451e+07	2.2451e+07	3e-08	63.4			breambac-46o21	2	same	487840	1	-
breambac-37h21.f	Ga_group_01	67.02	191	58	2	610	799	2.2455e+07	2.24548e+07	7e-14	82.4			breambac-37h21	2	same	13701.4	-1	+
breambac-139k22.f	Ga_group_01	66.11	180	56	2	639	817	2.2455e+07	2.24548e+07	5e-10	69.7			breambac-139k22	2	same	13743.7	-1	+	Contig End	breambac-139k22.f
breambac-127g2.r	Ga_group_01	84.42	77	12	0	46	122	2.24569e+07	2.24569e+07	6e-15	85.6			breambac-127g2	2	same	1.65752e+07	1	-
breambac-39d16.r	Ga_group_01	77	213	45	4	146	358	2.24625e+07	2.24625e+07	2e-33	145			breambac-39d16	2	same	76298.7	1	+	Contig Start	breambac-39d16.r
breambac-115m9.f	Ga_group_01	95.71	140	4	1	225	364	2.24646e+07	2.24645e+07	2e-47	193	13		breambac-115m9	2	same	916304	-1	-
breambac-3i3.f	Ga_group_01	95	140	5	1	225	364	2.24646e+07	2.24645e+07	1e-46	190	13		breambac-3i3	2	same	920674	-1	-
breambac-80k20.f	Ga_group_01	92.31	182	11	2	183	364	22464649	2.24645e+07	1e-56	223	13		breambac-80k20	2	same	920721	-1	-
breambac-29e16.r	Ga_group_01	89.26	121	12	1	603	723	2.24811e+07	2.2481e+07	4e-32	142	14		breambac-29e16	2	same	932646	-1	+
breambac-10b13.r	Ga_group_01	88.14	118	13	1	598	715	2.24811e+07	2.2481e+07	1e-29	134	13		breambac-10b13	2	same	920282	-1	-
breambac-111h4.r	Ga_group_01	84.3	414	57	3	20	432	2.24855e+07	2.24852e+07	2e-118	429	13		breambac-111h4	2	same	958565	-1	-
breambac-123g20.r	Ga_group_01	87.84	444	37	5	1	435	2.24855e+07	2.24852e+07	2e-128	462	14		breambac-123g20	2	same	937111	-1	+
breambac-142p7.f	Ga_group_01	78.36	134	25	2	525	658	2.24865e+07	2.24866e+07	3e-19	99.9			breambac-142p7	2	same	51754.4	1	+
breambac-113m16.f	Ga_group_01	79.79	94	16	1	24	114	22496663	2.24966e+07	1e-12	77.7	13		breambac-113m16	2	same	973413	-1	-
breambac-66j20.r	Ga_group_01	92.21	488	35	2	51	538	2.24967e+07	2.24972e+07	4e-180	633			breambac-66j20	2	same	77789.1	1	+
breambac-37c14.r	Ga_group_01	82.05	117	18	2	369	485	2.25085e+07	2.25084e+07	4e-19	99.9	13		breambac-37c14	2	same	973517	-1	-
breambac-17e19.r	Ga_group_01	90.98	499	42	1	154	652	2.25144e+07	2.25148e+07	4e-177	624			breambac-17e19	2	same	62362.8	1	+
breambac-40d7.r	Ga_group_01	82.49	177	30	1	347	523	2.25249e+07	22525034	1e-41	174			breambac-40d7	2	same	6016.54	1	+
breambac-40d7.f	Ga_group_01	91.83	404	24	2	1	403	2.25309e+07	2.25304e+07	1e-136	489			breambac-40d7	2	same	6016.54	-1	+
breambac-105j3.f	Ga_group_01	86.74	279	25	1	89	367	2.25365e+07	2.25362e+07	4e-78	294	13		breambac-105j3	2	same	1.01196e+06	-1	-
breambac-135m6.f	Ga_group_01	75.1	257	57	4	31	281	2.25366e+07	2.25368e+07	3e-38	163			breambac-135m6	2	same	40111.9	1	+
breambac-6h23.r	Ga_group_01	83.44	151	23	1	103	251	2.2537e+07	2.25371e+07	2e-34	150			breambac-6h23	2	same	58978.2	1	+	MAX	breambac-6h23.r
breambac-142p7.r	Ga_group_01	87.86	173	21	0	561	733	2.25382e+07	2.25381e+07	1e-52	210			breambac-142p7	2	same	51754.4	-1	+
breambac-39d16.f	Ga_group_01	81.46	151	28	0	16	166	2.25388e+07	2.25386e+07	6e-35	152			breambac-39d16	2	same	76298.7	-1	+		breambac-39d16.f
breambac-24l1.r	Ga_group_01	86.21	232	22	2	126	357	2.2569e+07	2.25692e+07	7e-58	228			breambac-24l1	2	same	53233.2	1	+
breambac-66j20.f	Ga_group_01	82.42	330	49	3	112	432	2.25745e+07	2.25742e+07	2e-80	302			breambac-66j20	2	same	77789.1	-1	+
breambac-135m6.r	Ga_group_01	82.48	702	96	9	9	688	2.25767e+07	2.25762e+07	2e-169	599			breambac-135m6	2	same	40111.9	-1	+
breambac-17e19.f	Ga_group_01	80.62	583	93	7	43	610	2.25767e+07	2.25763e+07	2e-130	469			breambac-17e19	2	same	62362.8	-1	+
breambac-70j1.f	Ga_group_01	88.14	312	34	2	152	460	2.25794e+07	2.25796e+07	4e-97	358			breambac-70j1	2	same	55038.8	1	+
breambac-68l22.r	Ga_group_01	88.14	312	34	2	180	488	2.25794e+07	2.25796e+07	4e-97	358			breambac-68l22	2	same	55120.3	1	+
breambac-76k24.f	Ga_group_01	87.82	312	35	2	199	507	2.25794e+07	2.25796e+07	4e-96	355			breambac-76k24	2	same	61972.4	1	+
breambac-85p8.f	Ga_group_01	79.34	213	37	3	221	432	2.2593e+07	2.25931e+07	5e-37	158			breambac-85p8	2	same	48268	1	+
breambac-100i5.r	Ga_group_01	79.81	213	36	3	201	412	2.2593e+07	2.25931e+07	9e-38	161			breambac-100i5	2	same	48418.3	1	+
breambac-131o5.r	Ga_group_01	79.34	213	37	3	184	395	2.2593e+07	2.25931e+07	8e-37	158			breambac-131o5	2	same	52005	1	+
breambac-38a10.r	Ga_group_01	79.3	227	40	3	161	386	2.2593e+07	2.25931e+07	6e-41	171			breambac-38a10	2	same	52049.6	1	+	MAX	breambac-38a10.r
breambac-6h23.f	Ga_group_01	81.49	281	40	1	165	433	2.2596e+07	2.25958e+07	4e-66	255			breambac-6h23	2	same	58978.2	-1	+		breambac-6h23.f
breambac-120h3.r	Ga_group_01	79.19	173	28	5	88	257	2.25993e+07	2.25995e+07	5e-22	109			breambac-120h3	2	same	35068.1	1	+
breambac-17e24.f	Ga_group_01	79.19	173	28	5	127	296	2.25993e+07	2.25995e+07	3e-22	109			breambac-17e24	2	same	41883.7	1	+
breambac-7n16.r	Ga_group_01	78.61	173	29	5	64	233	2.25993e+07	2.25995e+07	4e-21	106			breambac-7n16	2	same	42038.6	1	+
breambac-123f8.f	Ga_group_01	67.82	202	49	3	11	197	2.26016e+07	2.26017e+07	3e-09	66.6			breambac-123f8	2	same	43436.1	1	+
breambac-24l1.f	Ga_group_01	93.75	368	16	1	1	368	2.26222e+07	2.26219e+07	4e-137	491			breambac-24l1	2	same	53233.2	-1	+
breambac-120h3.f	Ga_group_01	68.22	129	37	2	93	220	2.26344e+07	2.26343e+07	2e-05	53.9			breambac-120h3	2	same	35068.1	-1	+
breambac-70j1.r	Ga_group_01	68.22	129	37	2	37	164	2.26344e+07	2.26343e+07	2e-05	53.9			breambac-70j1	2	same	55038.8	-1	+
breambac-68l22.f	Ga_group_01	85.94	64	8	1	1	64	2.26345e+07	2.26344e+07	1e-08	65			breambac-68l22	2	same	55120.3	-1	+
breambac-17e24.r	Ga_group_01	83.99	537	65	3	241	756	2.26412e+07	2.26408e+07	5e-147	524			breambac-17e24	2	same	41883.7	-1	+
breambac-85p8.r	Ga_group_01	85.32	477	59	2	239	704	2.26412e+07	2.26409e+07	2e-141	505			breambac-85p8	2	same	48268	-1	+
breambac-76k24.r	Ga_group_01	77.21	215	45	2	11	224	2.26413e+07	2.26412e+07	5e-39	164			breambac-76k24	2	same	61972.4	-1	+
breambac-100i5.f	Ga_group_01	82.17	258	42	2	1	258	2.26414e+07	2.26412e+07	2e-62	242			breambac-100i5	2	same	48418.3	-1	+
breambac-7n16.f	Ga_group_01	81.82	264	44	2	1	264	2.26414e+07	2.26412e+07	3e-63	245			breambac-7n16	2	same	42038.6	-1	+
breambac-131o5.f	Ga_group_01	87.82	665	59	8	3	657	2.2645e+07	2.26445e+07	0	694			breambac-131o5	2	same	52005	-1	+
breambac-123f8.r	Ga_group_01	91.39	476	38	2	209	683	2.2645e+07	2.26447e+07	2e-171	605			breambac-123f8	2	same	43436.1	-1	+
breambac-38a10.f	Ga_group_01	91.81	476	36	2	243	717	2.2645e+07	2.26447e+07	3e-173	611			breambac-38a10	2	same	52049.6	-1	+	Contig End	breambac-38a10.f
breambac-114d9.f	Ga_group_01	76.15	218	42	3	466	682	2.26456e+07	2.26458e+07	4e-32	142			breambac-114d9	2	same	56910.8	1	+	Contig Start	breambac-114d9.f
breambac-78c4.r	Ga_group_01	79.69	256	35	2	297	535	2.26484e+07	2.26486e+07	3e-49	199			breambac-78c4	2	same	39181	1	+
breambac-107g7.r	Ga_group_01	79.69	256	35	2	317	555	2.26484e+07	2.26486e+07	3e-49	199			breambac-107g7	2	same	45117.5	1	+
breambac-68k8.r	Ga_group_01	79.69	256	35	2	298	536	2.26484e+07	2.26486e+07	3e-49	199			breambac-68k8	2	same	56428.2	1	+
breambac-44a12.r	Ga_group_01	74.5	451	98	4	278	719	22652282	2.26527e+07	2e-74	283			breambac-44a12	2	same	74622.4	1	+
breambac-78c4.f	Ga_group_01	80.2	202	33	4	5	206	2.26876e+07	2.26875e+07	3e-35	152			breambac-78c4	2	same	39181	-1	+
breambac-82h9.f	Ga_group_01	78.68	516	81	13	44	558	2.26877e+07	22688034	1e-84	316			breambac-82h9	2	same	69760.2	1	+
breambac-107g7.f	Ga_group_01	77.85	492	88	8	126	614	2.26936e+07	2.26932e+07	7e-100	367			breambac-107g7	2	same	45117.5	-1	+
breambac-115l3.r	Ga_group_01	88.43	121	13	1	1	120	2.26937e+07	2.26938e+07	2e-31	139			breambac-115l3	2	same	69053	1	+	MAX	breambac-115l3.r
breambac-2f12.r	Ga_group_01	74.92	642	130	8	132	764	2.26981e+07	22698577	6e-107	391			breambac-2f12	2	same	46274.4	1	+
breambac-114d9.r	Ga_group_01	84.51	213	24	2	391	603	2.27025e+07	2.27024e+07	1e-50	204			breambac-114d9	2	same	56910.8	-1	+		breambac-114d9.r
breambac-68k8.f	Ga_group_01	79.77	519	93	2	104	622	2.27049e+07	2.27044e+07	2e-127	459			breambac-68k8	2	same	56428.2	-1	+
breambac-131k15.r	Ga_group_01	80.39	51	10	0	647	697	2.27134e+07	2.27134e+07	7e-05	52.3			breambac-131k15	2	same	65778.7	1	+
breambac-44a12.f	Ga_group_01	88.83	179	20	0	489	667	2.27269e+07	2.27268e+07	6e-56	221			breambac-44a12	2	same	74622.4	-1	+
breambac-98g15.f	Ga_group_01	77.95	381	78	4	11	387	2.2728e+07	2.27284e+07	7e-79	297			breambac-98g15	2	same	61009.5	1	+	MAX	breambac-98g15.f
breambac-2f12.f	Ga_group_01	80	95	19	0	191	285	2.27444e+07	22744281	8e-17	91.9			breambac-2f12	2	same	46274.4	-1	+
breambac-45m6.r	Ga_group_01	80.77	78	14	1	3	80	2.27479e+07	2.27479e+07	1e-09	68.2			breambac-45m6	2	same	2.21353e+07	1	-
breambac-82h9.r	Ga_group_01	81.74	438	71	2	269	697	2.27574e+07	2.2757e+07	3e-113	412			breambac-82h9	2	same	69760.2	-1	+
breambac-115l3.f	Ga_group_01	68.02	197	58	3	85	276	2.27628e+07	22762602	6e-15	85.6			breambac-115l3	2	same	69053	-1	+		breambac-115l3.f
breambac-131k15.f	Ga_group_01	71.97	157	38	2	3	157	2.27791e+07	2.2779e+07	6e-15	85.6			breambac-131k15	2	same	65778.7	-1	+
breambac-98g15.r	Ga_group_01	89.86	217	22	0	491	707	2.2789e+07	2.27888e+07	4e-72	275			breambac-98g15	2	same	61009.5	-1	+	Contig End	breambac-98g15.r
breambac-143o3.f	Ga_group_01	80.3	406	51	4	6	382	2.27896e+07	2.279e+07	7e-84	313			breambac-143o3	2	same	6.87986e+06	1	-
breambac-140i14.r	Ga_group_01	90.24	297	24	3	153	445	2.2822e+07	22821689	6e-92	340			breambac-140i14	2	same	3.82726e+06	-1	-
breambac-35g2.r	Ga_group_01	64.55	268	88	4	156	419	2.28521e+07	2.28523e+07	9e-19	98.3			breambac-35g2	2	same	55074.8	1	+	Contig Start	breambac-35g2.r
breambac-142n23.r	Ga_group_01	84.43	411	50	4	100	497	2.2872e+07	2.28716e+07	8e-100	367			breambac-142n23	2	same	788310	-1	-
breambac-35g2.f	Ga_group_01	82.81	413	63	4	423	828	2.29072e+07	2.29069e+07	2e-105	386			breambac-35g2	2	same	55074.8	-1	+	Contig End	breambac-35g2.f
breambac-116b7.r	Ga_group_01	76.32	397	58	5	145	539	2.29431e+07	2.29434e+07	3e-38	163			breambac-116b7	2	same	39820.2	1	+	Contig Start	breambac-116b7.r
breambac-14g6.f	Ga_group_01	83.02	53	9	0	319	371	22944954	22944914	1e-06	57.1			breambac-14g6	2	same	1.57998e+07	-1	-
breambac-75f3.f	Ga_group_01	84.52	168	24	1	370	535	22946214	2.29463e+07	1e-41	174			breambac-75f3	2	same	6756.08	1	+
breambac-75f3.r	Ga_group_01	77.73	642	113	5	57	696	2.2953e+07	2.29524e+07	9e-122	440			breambac-75f3	2	same	6756.08	-1	+
breambac-43b23.f	Ga_group_01	78.85	681	113	6	104	781	2.2953e+07	2.29524e+07	2e-136	489			breambac-43b23	2	same	833954	-1	-
breambac-127m24.r	Ga_group_01	80.19	106	19	2	205	310	2.29641e+07	2.2964e+07	1e-14	84			breambac-127m24	2	same	2.3682e+06	-1	-
breambac-71p19.f	Ga_group_01	90.62	64	4	1	491	554	2.29742e+07	2.29743e+07	4e-11	72.9			breambac-71p19	2	same	82500	1	+	MAX	breambac-71p19.f
breambac-116b7.f	Ga_group_01	70.34	435	87	10	322	724	2.29829e+07	2.29826e+07	2e-34	150			breambac-116b7	2	same	39820.2	-1	+		breambac-116b7.f
breambac-28m2.f	Ga_group_01	82.71	133	23	0	34	166	2.30146e+07	2.30147e+07	4e-31	139			breambac-28m2	2	same	101.538	1	+
breambac-28m2.r	Ga_group_01	82.71	133	23	0	547	679	2.30147e+07	2.30146e+07	4e-31	139			breambac-28m2	2	same	101.538	-1	+
breambac-40d13.r	Ga_group_01	88.08	193	17	1	523	715	2.30356e+07	2.30357e+07	2e-54	217			breambac-40d13	2	same	47734.2	1	+
breambac-96e6.f	Ga_group_01	86.01	143	19	1	536	678	2.30374e+07	2.30376e+07	7e-36	155			breambac-96e6	2	same	52693.9	1	+	MAX	breambac-96e6.f
breambac-71p19.r	Ga_group_01	90.62	96	9	0	169	264	2.30567e+07	2.30567e+07	6e-27	125			breambac-71p19	2	same	82500	-1	+		breambac-71p19.r
breambac-122a14.r	Ga_group_01	79.2	250	46	2	595	844	2.30586e+07	2.30588e+07	1e-50	204			breambac-122a14	2	same	57074.2	1	+
breambac-106i8.f	Ga_group_01	71.3	115	28	2	92	201	23073439	23073553	5e-09	65			breambac-106i8	2	same	44669	1	+
breambac-97n24.f	Ga_group_01	83.13	243	37	2	270	512	2.30764e+07	2.30766e+07	7e-60	234			breambac-97n24	2	same	42501.7	1	+	MAX	breambac-97n24.f
breambac-40d13.f	Ga_group_01	76.4	250	45	4	344	588	2.30833e+07	2.30831e+07	7e-37	158			breambac-40d13	2	same	47734.2	-1	+
breambac-96e6.r	Ga_group_01	78.95	57	12	0	463	519	2.30901e+07	2.30901e+07	2e-05	53.9			breambac-96e6	2	same	52693.9	-1	+		breambac-96e6.r
breambac-31a5.r	Ga_group_01	83.76	234	35	3	261	493	2.30924e+07	2.30925e+07	5e-57	225			breambac-31a5	2	same	48581.8	1	+
breambac-27h5.f	Ga_group_01	67.86	140	42	2	200	339	2.30934e+07	2.30935e+07	5e-05	52.3			breambac-27h5	2	same	47442.7	1	+
breambac-134e14.f	Ga_group_01	82.05	234	30	3	466	695	2.30936e+07	2.30938e+07	3e-37	160			breambac-134e14	2	same	42074.7	1	+
breambac-120n16.r	Ga_group_01	81.2	234	32	3	476	705	2.30936e+07	2.30938e+07	2e-35	153			breambac-120n16	2	same	47172.7	1	+
breambac-95k17.f	Ga_group_01	79.17	312	54	2	51	359	2.30961e+07	2.30964e+07	3e-70	269			breambac-95k17	2	same	44696.1	1	+
breambac-100a15.f	Ga_group_01	79.17	312	54	2	50	358	2.30961e+07	2.30964e+07	3e-70	269			breambac-100a15	2	same	58047.8	1	+
breambac-122a14.f	Ga_group_01	86.9	145	19	0	383	527	2.31157e+07	2.31155e+07	1e-40	171			breambac-122a14	2	same	57074.2	-1	+
breambac-79n21.f	Ga_group_01	89.55	67	6	1	605	671	2.31174e+07	2.31175e+07	5e-12	76.1			breambac-79n21	2	same	38918.9	1	+
breambac-106i8.r	Ga_group_01	82.98	47	8	0	123	169	23118108	23118062	0.0001	50.7			breambac-106i8	2	same	44669	-1	+
breambac-120n13.r	Ga_group_01	75.45	444	84	6	120	542	2.31188e+07	2.31191e+07	2e-66	256			breambac-120n13	2	same	37559	1	+
breambac-20j12.r	Ga_group_01	75.45	444	84	6	110	532	2.31188e+07	2.31191e+07	2e-66	256			breambac-20j12	2	same	37559	1	+
breambac-69o5.f	Ga_group_01	85.05	214	31	1	315	527	2.31188e+07	2.31189e+07	4e-51	206			breambac-69o5	2	same	37559	1	+
breambac-20h14.f	Ga_group_01	73.66	391	82	5	315	684	2.31188e+07	2.31191e+07	4e-51	206			breambac-20h14	2	same	45188.9	1	+	MAX	breambac-20h14.f
breambac-97n24.r	Ga_group_01	79.27	193	39	1	498	689	2.31189e+07	2.31188e+07	3e-38	163			breambac-97n24	2	same	42501.7	-1	+		breambac-97n24.r
breambac-23l6.r	Ga_group_01	88.2	161	19	0	1	161	2.31199e+07	2.312e+07	1e-48	196			breambac-23l6	2	same	36288.6	1	+
breambac-134e14.r	Ga_group_01	74.05	131	29	2	573	698	2.31357e+07	2.31356e+07	5e-13	79.2			breambac-134e14	2	same	42074.7	-1	+
breambac-95k17.r	Ga_group_01	79.9	194	35	2	368	559	2.31408e+07	2.31407e+07	2e-38	163			breambac-95k17	2	same	44696.1	-1	+
breambac-120n16.f	Ga_group_01	73.05	282	69	4	378	655	2.31408e+07	2.31406e+07	9e-39	164			breambac-120n16	2	same	47172.7	-1	+
breambac-27h5.r	Ga_group_01	73.67	281	67	3	363	638	2.31408e+07	2.31406e+07	2e-42	177			breambac-27h5	2	same	47442.7	-1	+
breambac-31a5.f	Ga_group_01	86.09	115	14	1	125	239	2.3141e+07	2.31409e+07	4e-26	122			breambac-31a5	2	same	48581.8	-1	+
breambac-44c21.f	Ga_group_01	84.05	232	28	4	405	632	2.31441e+07	2.31444e+07	4e-51	206	15		breambac-44c21	2	same	2.40607e+06	1	-
breambac-100a15.r	Ga_group_01	89	100	11	0	142	241	2.31542e+07	2.31541e+07	8e-27	125			breambac-100a15	2	same	58047.8	-1	+
breambac-23l6.f	Ga_group_01	78.63	262	46	5	301	557	2.31562e+07	2.3156e+07	1e-44	183			breambac-23l6	2	same	36288.6	-1	+
breambac-120n13.f	Ga_group_01	73.78	595	127	9	96	683	2.31563e+07	2.31559e+07	2e-86	323			breambac-120n13	2	same	37559	-1	+
breambac-20j12.f	Ga_group_01	73.27	565	119	12	96	650	2.31563e+07	2.31559e+07	7e-68	261			breambac-20j12	2	same	37559	-1	+
breambac-69o5.r	Ga_group_01	72.83	552	120	9	52	596	2.31563e+07	2.31559e+07	8e-71	271			breambac-69o5	2	same	37559	-1	+
[truncated: 30,944 more rows]
