# Supplementary figures and images for: A Comparative BAC Map for the Gilthead Sea Bream (Sparus aurata L.)
Source: Hindawi journal article supplement (doi:10.1155/2011/329025), 2010-10-13

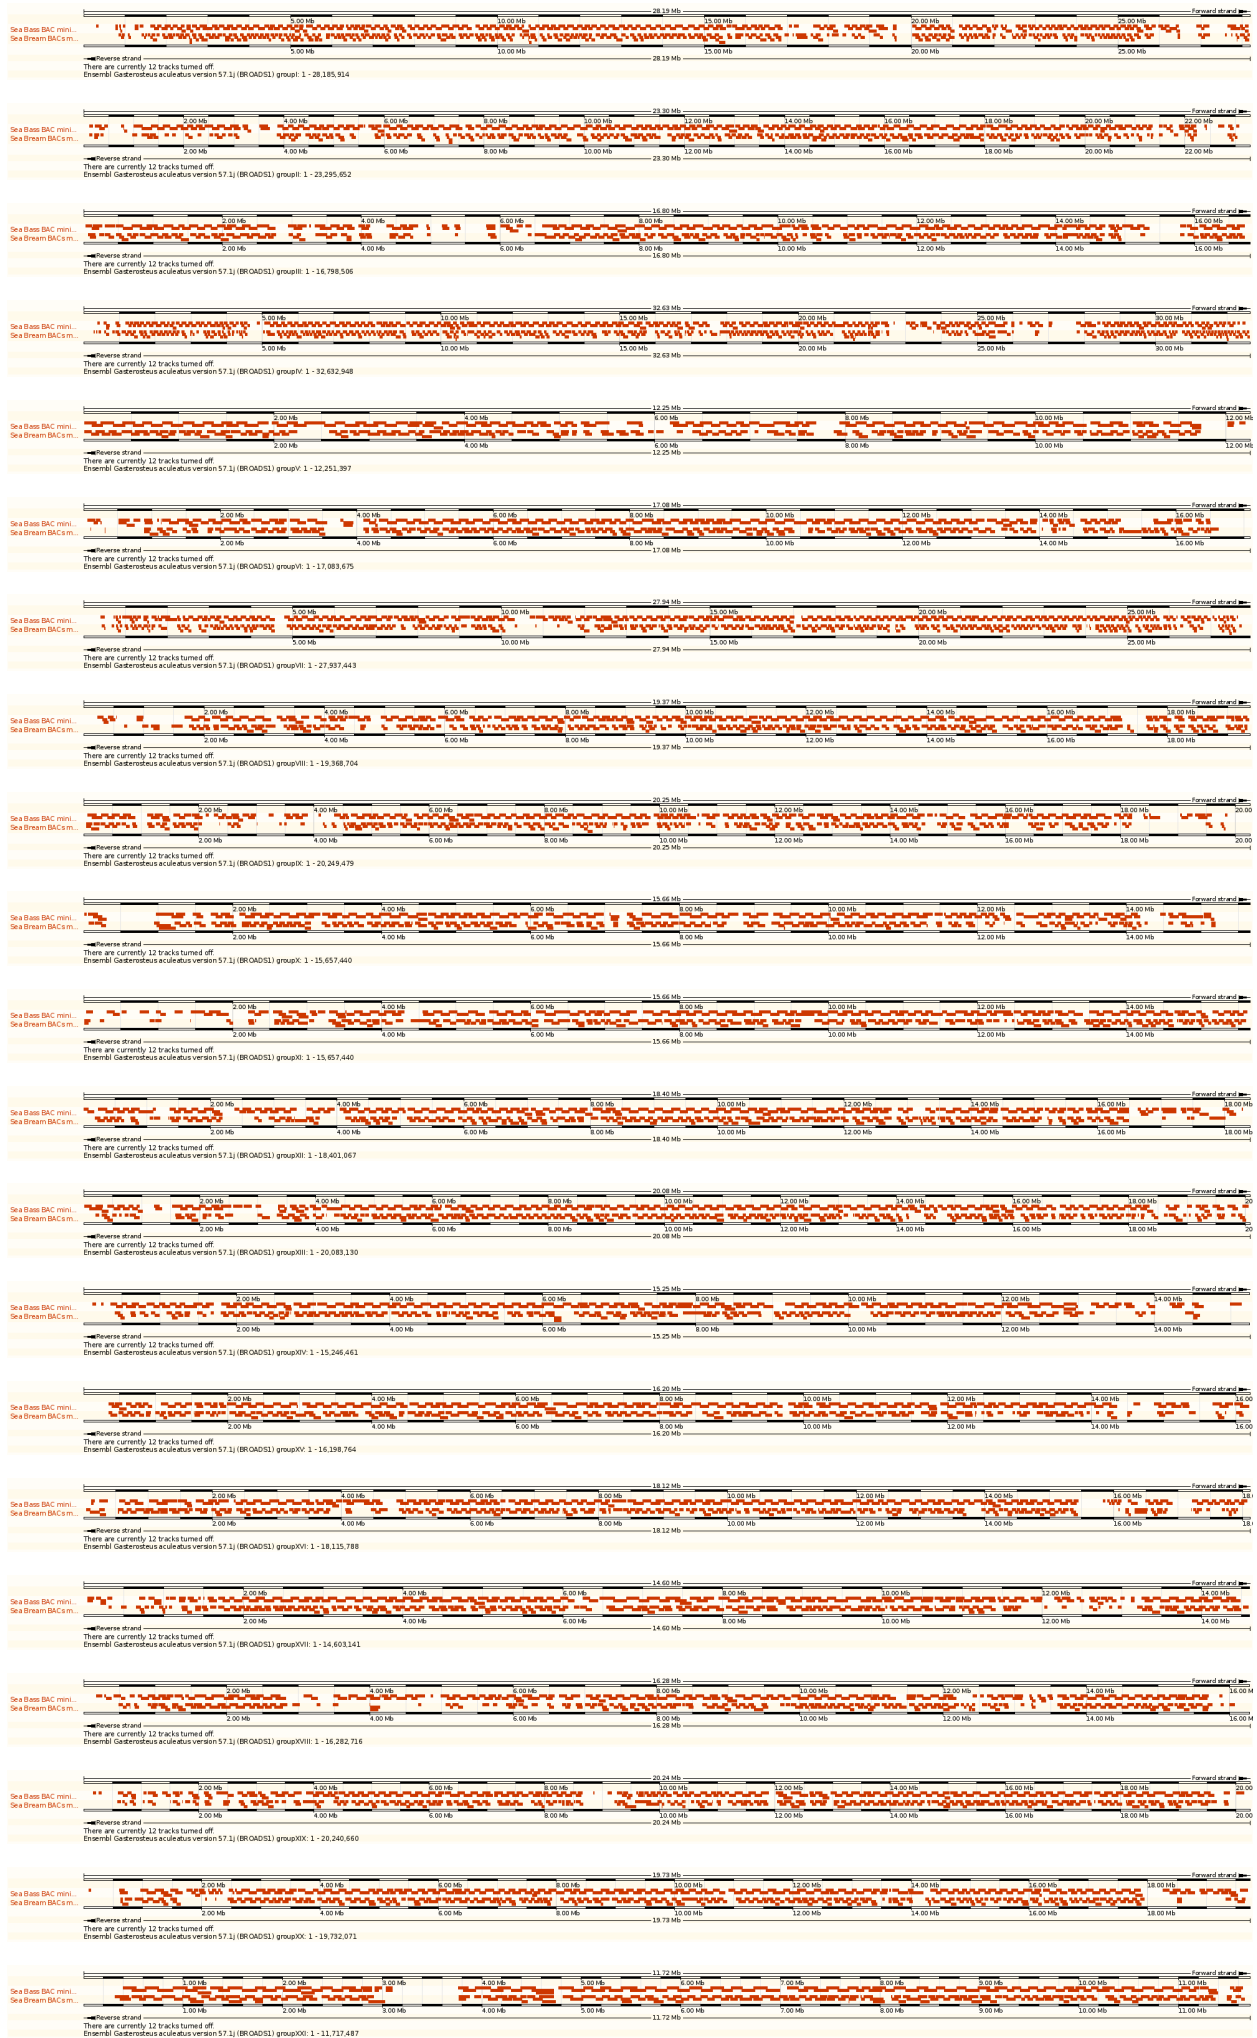

Supplement: f2 [file 329025.f2.pdf]
